# Supplementary material
Source: publisher figshare collection journal article supplement (https://gsajournals.figshare.com/articles/dataset/_/15130656)
Supplement: Supplementary file 1 [file 1]

1B\_Partial\_36-3F\_213.txt-- Matches:352; Mismatches:3; Gaps:249; Unattempted:0  
1B\_Partial\_36-3R\_161.txt-- Matches:359; Mismatches:3; Gaps:240; Unattempted:0

\*

599>CAG~~>601  
354>CAGAA>358  
1<~~~~~<1
