# Supplementary material
Source: publisher figshare collection journal article supplement (https://gsajournals.figshare.com/articles/dataset/_/15130656)
Supplement: Supplementary file 1 [file 1]

## Sheet: CRISPR Oligos
GENE	Oligo/Guide #	Oligo Name	Description	Genomic Target (sequence) ; X=mismatch	Ordered sgRNA/CRISPR Oligo	Guide Synthesis Method Used
nrxn1A	c1	41_g1a-1	Promoter region	GGTGGTGCAGCATTCAAACA	TAATACGACTCACTATAGGTGGTGCAGCATTCAAACAGTTTTAGAGCTAGAAATAGCAAG	Extension - Gagnon et al., 2014
	c2	42_g1a-2	Promoter region	GGAAACAGAGAAGACCATAC	TAATACGACTCACTATAGGAAACAGAGAAGACCATACGTTTTAGAGCTAGAAATAGCAAG	Extension - Gagnon et al., 2014
	c3	45_g1a-5	3'UTR region	GGGCCATTCGGAATAGATTG	TAATACGACTCACTATAGGGCCATTCGGAATAGATTGGTTTTAGAGCTAGAAATAGCAAG	Extension - Gagnon et al., 2014
	c4	46_g1a-6	3'UTR region	GGCAGTATTGCGCGGATGTT	TAATACGACTCACTATAGGCAGTATTGCGCGGATGTTGTTTTAGAGCTAGAAATAGCAAG	Extension - Gagnon et al., 2014
	c5	43_g1a-3	Exon 7	GGCCTCTTGCGTATATCCAG	TAATACGACTCACTATAGGCCTCTTGCGTATATCCAGGTTTTAGAGCTAGAAATAGCAAG	Extension - Gagnon et al., 2014
	c6	44_g1a-4	Exon 7	GGCAGGTGATCCAGGAAGAT	TAATACGACTCACTATAGGCAGGTGATCCAGGAAGATGTTTTAGAGCTAGAAATAGCAAG	Extension - Gagnon et al., 2014
	c7	85_nrxn1a-TransMB_CRISPR_01	5' of TransMembrane domain sequence	GCTCGGGTAACCCTTGGCCT	TAATACGACTCACTATAGGTCGGGTAACCCTTGGCCTGTTTTAGAGCTAGAAATAGCAAG	Extension - Gagnon et al., 2014
	c8	86_nrxn1a-TransMB_CRISPR_02	5' of TransMembrane domain sequence	GGACTCCCGAATCACCTCT	TAATACGACTCACTATAGGACTCCCGAATCACCTCTGTTTTAGAGCTAGAAATAGCAAG	Extension - Gagnon et al., 2014
	c9	87_nrxn1a-TransMB_CRISPR_03	3' of TransMembrane domain sequence	CGACGAAGGGTCTTACCACG	TAATACGACTCACTATAGGACGAAGGGTCTTACCACGGTTTTAGAGCTAGAAATAGCAAG	Extension - Gagnon et al., 2014
	c10	88_nrxn1a-TransMB_CRISPR_04	3' of TransMembrane domain sequence	GGCAGCTCCATTGGGCTGCG	TAATACGACTCACTATAGGCAGCTCCATTGGGCTGCGGTTTTAGAGCTAGAAATAGCAAG	Extension - Gagnon et al., 2014
nrxn1B	c11	47_g1b-1	Promoter region	GTCCAAGGTGCTGCAAAGCG	TAATACGACTCACTATAGGCCAAGGTGCTGCAAAGCGGTTTTAGAGCTAGAAATAGCAAG	Extension - Gagnon et al., 2014
	c12	48_g1b-2	Promoter region	CGTGATGTGAATCTGGCGGG	TAATACGACTCACTATAGGTGATGTGAATCTGGCGGGGTTTTAGAGCTAGAAATAGCAAG	Extension - Gagnon et al., 2014
	c13	50_g1b-5	3'UTR region	GGCATAGTAATGGGGGGAAA	TAATACGACTCACTATAGGCATAGTAATGGGGGGAAAGTTTTAGAGCTAGAAATAGCAAG	Extension - Gagnon et al., 2014
	c14	51_g1b-6	3'UTR region	AGTCAAGAGCGTGGGTGAGG	TAATACGACTCACTATAGGTCAAGAGCGTGGGTGAGGGTTTTAGAGCTAGAAATAGCAAG	Extension - Gagnon et al., 2014
	c15	n1bgRNA1exon7	Exon 7	GGCGGCTCTTTACCGCAGGA	TAATACGACTCACTATAGGCGGCTCTTTACCGCAGGAGTTTTAGAGCTAGAAATAGCAAG	Extension - Gagnon et al., 2014
	c16	n1bgRNA2exon7	Exon 7	GGAGCGCCCTGCTGAACTAC	TAATACGACTCACTATAGGAGCGCCCTGCTGAACTACGTTTTAGAGCTAGAAATAGCAAG	Extension - Gagnon et al., 2014
	c17	89_nrxn1b-TransMB_CRISPR_01	5' of TransMembrane domain sequence	TGCTGATCGCGGGGCCTGTG	TAATACGACTCACTATAGGCTGATCGCGGGGCCTGTGGTTTTAGAGCTAGAAATAGCAAG	Extension - Gagnon et al., 2014
	c18	90_nrxn1b-TransMB_CRISPR_02	5' of TransMembrane domain sequence	GGGAGTCCAACGGCACCACA	TAATACGACTCACTATAGGGAGTCCAACGGCACCACAGTTTTAGAGCTAGAAATAGCAAG	Extension - Gagnon et al., 2014
	c19	91_nrxn1b-TransMB_CRISPR_03	3' of TransMembrane domain sequence	AGACGAGGGGTCGTACCATG	TAATACGACTCACTATAGGACGAGGGGTCGTACCATGGTTTTAGAGCTAGAAATAGCAAG	Extension - Gagnon et al., 2014
	c20	92_nrxn1b-TransMB_CRISPR_04	3' of TransMembrane domain sequence	AGTTTCTGCTCTCGTCCACA	TAATACGACTCACTATAGGTTTCTGCTCTCGTCCACAGTTTTAGAGCTAGAAATAGCAAG	Extension - Gagnon et al., 2014
nrxn2A	c21	c70_nrxn2A_CRISPR-01_TOP	Promoter region	GAAGTGCACCTGCATTCCAC	TAATACGACTCACTATAGGAGTGCACCTGCATTCCACGTTTTAGAGCTAGAAATAGCAAGTTAAAATAAGGCTAGTCCGTTATCAACTTGAAAAAGTGGCACCGAGTCGGTGCTTTT	Full length method
		c71_nrxn2A_CRISPR-01_BOTTOM	Promoter region		AAAAGCACCGACTCGGTGCCACTTTTTCAAGTTGATAACGGACTAGCCTTATTTTAACTTGCTATTTCTAGCTCTAAAACGTGGAATGCAGGTGCACTCCTATAGTGAGTCGTATTA	Full length method
	c22	c72_nrxn2A_CRISPR-02_TOP	Promoter region	AGTAATCCTACTTTCACCAG	TAATACGACTCACTATAGGTAATCCTACTTTCACCAGGTTTTAGAGCTAGAAATAGCAAGTTAAAATAAGGCTAGTCCGTTATCAACTTGAAAAAGTGGCACCGAGTCGGTGCTTTT	Full length method
		c73_nrxn2A_CRISPR-02_BOTTOM	Promoter region		AAAAGCACCGACTCGGTGCCACTTTTTCAAGTTGATAACGGACTAGCCTTATTTTAACTTGCTATTTCTAGCTCTAAAACCTGGTGAAAGTAGGATTACCTATAGTGAGTCGTATTA	Full length method
	c23	c27_nrxn2a CRISPR-01	5' of TransMembrane domain sequence	GGTAGGTTAGACCTGGAGTG	TAATACGACTCACTATAGGTAGGTTAGACCTGGAGTGGTTTTAGAGCTAGAAATAGCAAG	Extension - Gagnon et al., 2014
	c24	c28_nrxn2a CRISPR-02	5' of TransMembrane domain sequence	GGGCCGTCCAGGTGCCGTGG	TAATACGACTCACTATAGGGCCGTCCAGGTGCCGTGGGTTTTAGAGCTAGAAATAGCAAG	Extension - Gagnon et al., 2014
	c25	c29_nrxn2a CRISPR-03	3' of TransMembrane domain sequence	GGTGGTGGTTTTAGCCACGG	TAATACGACTCACTATAGGTGGTGGTTTTAGCCACGGGTTTTAGAGCTAGAAATAGCAAG	Extension - Gagnon et al., 2014
	c26	c30_nrxn2a CRISPR-04	3' of TransMembrane domain sequence	GGCACCGTTGCTTTCAGAGC	TAATACGACTCACTATAGGCACCGTTGCTTTCAGAGCGTTTTAGAGCTAGAAATAGCAAG	Extension - Gagnon et al., 2014
nrxn2B	c27	c74_nrxn2b_CRISPR-01_TOP	Promoter region	CGGTGTTCGCTGCTAGTCTC	TAATACGACTCACTATAGGGTGTTCGCTGCTAGTCTCGTTTTAGAGCTAGAAATAGCAAGTTAAAATAAGGCTAGTCCGTTATCAACTTGAAAAAGTGGCACCGAGTCGGTGCTTTT	Full length method
		c75_nrxn2b_CRISPR-01_BOTTOM	Promoter region		AAAAGCACCGACTCGGTGCCACTTTTTCAAGTTGATAACGGACTAGCCTTATTTTAACTTGCTATTTCTAGCTCTAAAACGAGACTAGCAGCGAACACCCTATAGTGAGTCGTATTA	Full length method
	c28	c76_nrxn2b_CRISPR-02_TOP	Promoter region	GGGGCAGGCAGTGTTGACGG	TAATACGACTCACTATAGGGGCAGGCAGTGTTGACGGGTTTTAGAGCTAGAAATAGCAAGTTAAAATAAGGCTAGTCCGTTATCAACTTGAAAAAGTGGCACCGAGTCGGTGCTTTT	Full length method
		c77_nrxn2b_CRISPR-02_BOTTOM	Promoter region		AAAAGCACCGACTCGGTGCCACTTTTTCAAGTTGATAACGGACTAGCCTTATTTTAACTTGCTATTTCTAGCTCTAAAACCCGTCAACACTGCCTGCCCCTATAGTGAGTCGTATTA	Full length method
	c29	c31_nrxn2b CRISPR-01	5' of TransMembrane domain sequence	GGGCGGCATCGACACATCCC	TAATACGACTCACTATAGGGCGGCATCGACACATCCCGTTTTAGAGCTAGAAATAGCAAG	Extension - Gagnon et al., 2014
	c30	c32_nrxn2b CRISPR-02	5' of TransMembrane domain sequence	GGTCTGTAGTGGGCACATGG	TAATACGACTCACTATAGGTCTGTAGTGGGCACATGGGTTTTAGAGCTAGAAATAGCAAG	Extension - Gagnon et al., 2014
	c31	c33_nrxn2b CRISPR-03	3' of TransMembrane domain sequence	GGTGCCCGTCTTGGCAGCGC	TAATACGACTCACTATAGGTGCCCGTCTTGGCAGCGCGTTTTAGAGCTAGAAATAGCAAG	Extension - Gagnon et al., 2014
	c32	c34_nrxn2b CRISPR-04	3' of TransMembrane domain sequence	GGGCTGTTTCTCCTTCACTA	TAATACGACTCACTATAGGGCTGTTTCTCCTTCACTAGTTTTAGAGCTAGAAATAGCAAG	Extension - Gagnon et al., 2014
nrxn3A	c33	C78-Nrxn3a-Crispr01-Top	Promoter region	GCGGTCGCATACCCCATATG	TAATACGACTCACTATAGGGGTCGCATACCCCATATGGTTTTAGAGCTAGAAATAGCAAGTTAAAATAAGGCTAGTCCGTTATCAACTTGAAAAAGTGGCACCGAGTCGGTGCTTTT	Full length method
		C79-Nrxn3a-Crispr01-Bottom	Promoter region		AAAAGCACCGACTCGGTGCCACTTTTTCAAGTTGATAACGGACTAGCCTTATTTTAACTTGCTATTTCTAGCTCTAAAACCATATGGGGTATGCGACCCCTATAGTGAGTCGTATTA	Full length method
	c34	C80-Nrxn3a-Crispr02-Top	Promoter region	GGGTTCACTGATCCAATCAG	TAATACGACTCACTATAGGGTTCACTGATCCAATCAGGTTTTAGAGCTAGAAATAGCAAGTTAAAATAAGGCTAGTCCGTTATCAACTTGAAAAAGTGGCACCGAGTCGGTGCTTTT	Full length method
		C81-Nrxn3a-Crispr02-BOTTOM	Promoter region		AAAAGCACCGACTCGGTGCCACTTTTTCAAGTTGATAACGGACTAGCCTTATTTTAACTTGCTATTTCTAGCTCTAAAACCTGATTGGATCAGTGAACCCTATAGTGAGTCGTATTA	Full length method
	c35	C46-nrxn3a-CRISPR-01-TOP	5' of TransMembrane domain sequence	GGGTACATTACGGAACATGG	TAATACGACTCACTATAGGGTACATTACGGAACATGGGTTTTAGAGCTAGAAATAGCAAGTTAAAATAAGGCTAGTCCGTTATCAACTTGAAAAAGTGGCACCGAGTCGGTGCTTTT	Full length method
		C47-nrxn3a-CRISPR-01-Bottom	5' of TransMembrane domain sequence		AAAAGCACCGACTCGGTGCCACTTTTTCAAGTTGATAACGGACTAGCCTTATTTTAACTTGCTATTTCTAGCTCTAAAACCCATGTTCCGTAATGTACCCTATAGTGAGTCGTATTA	Full length method
	c36	c64_nrxn3a CRISPR-05_TOP	5' of TransMembrane domain sequence	GGGCATCAGGCGGGTTCCGG	TAATACGACTCACTATAGGGCATCAGGCGGGTTCCGGGTTTTAGAGCTAGAAATAGCAAGTTAAAATAAGGCTAGTCCGTTATCAACTTGAAAAAGTGGCACCGAGTCGGTGCTTTT	Full length method
		c65_nrxn3a CRISPR-05_BOTTOM	5' of TransMembrane domain sequence		AAAAGCACCGACTCGGTGCCACTTTTTCAAGTTGATAACGGACTAGCCTTATTTTAACTTGCTATTTCTAGCTCTAAAACCCGGAACCCGCCTGATGCCCTATAGTGAGTCGTATTA	Full length method
	c37	c66_nrxn3a CRISPR-06_TOP	3' of TransMembrane domain sequence	GGACGAGGGGTCCTACCAAG	TAATACGACTCACTATAGGACGAGGGGTCCTACCAAGGTTTTAGAGCTAGAAATAGCAAGTTAAAATAAGGCTAGTCCGTTATCAACTTGAAAAAGTGGCACCGAGTCGGTGCTTTT	Full length method
		c67_nrxn3a CRISPR-06_BOTTOM	3' of TransMembrane domain sequence		AAAAGCACCGACTCGGTGCCACTTTTTCAAGTTGATAACGGACTAGCCTTATTTTAACTTGCTATTTCTAGCTCTAAAACCTTGGTAGGACCCCTCGTCCTATAGTGAGTCGTATTA	Full length method
	c38	c68_nrxn3a CRISPR-07_TOP	3' of TransMembrane domain sequence	GCCATTGCTCTGCGCCGAGT	TAATACGACTCACTATAGGCATTGCTCTGCGCCGAGTGTTTTAGAGCTAGAAATAGCAAGTTAAAATAAGGCTAGTCCGTTATCAACTTGAAAAAGTGGCACCGAGTCGGTGCTTTT	Full length method
		c69_nrxn3a CRISPR-07_BOTTOM	3' of TransMembrane domain sequence		AAAAGCACCGACTCGGTGCCACTTTTTCAAGTTGATAACGGACTAGCCTTATTTTAACTTGCTATTTCTAGCTCTAAAACACTCGGCGCAGAGCAATGCCTATAGTGAGTCGTATTA	Full length method
nrxn3B	c39	C82-Nrxn3b-Crispr01-Top	Promoter region	AGGCAAGGCATTATGGAGAA	TAATACGACTCACTATAGGGCAAGGCATTATGGAGAAGTTTTAGAGCTAGAAATAGCAAGTTAAAATAAGGCTAGTCCGTTATCAACTTGAAAAAGTGGCACCGAGTCGGTGCTTTT	Full length method
		C83-Nrxn3b-Crispr01-Bottom	Promoter region		AAAAGCACCGACTCGGTGCCACTTTTTCAAGTTGATAACGGACTAGCCTTATTTTAACTTGCTATTTCTAGCTCTAAAACTTCTCCATAATGCCTTGCCCTATAGTGAGTCGTATTA	Full length method
	c40	C84-Nrxn3b-Crispr02-Top	Promoter region	GGGGAGGCTTTTGTCTCTGG	TAATACGACTCACTATAGGGGAGGCTTTTGTCTCTGGGTTTTAGAGCTAGAAATAGCAAGTTAAAATAAGGCTAGTCCGTTATCAACTTGAAAAAGTGGCACCGAGTCGGTGCTTTT	Full length method
		C85-Nrxn3b-Crispr02-Bottom	Promoter region		AAAAGCACCGACTCGGTGCCACTTTTTCAAGTTGATAACGGACTAGCCTTATTTTAACTTGCTATTTCTAGCTCTAAAACCCAGAGACAAAAGCCTCCCCTATAGTGAGTCGTATTA	Full length method
	c41	c42_nrxn3b CRISPR-01	5' of TransMembrane domain sequence	GGGGGCACTCTCCTGATACC	TAATACGACTCACTATAGGGGGCACTCTCCTGATACCGTTTTAGAGCTAGAAATAGCAAG	Extension - Gagnon et al., 2014
	c42	c43_nrxn3b CRISPR-02	5' of TransMembrane domain sequence	TGTGTGATGTACGGCCCCTT	TAATACGACTCACTATAGGTGTGATGTACGGCCCCTTGTTTTAGAGCTAGAAATAGCAAG	Extension - Gagnon et al., 2014
	c43	c44_nrxn3b CRISPR-03	3' of TransMembrane domain sequence	CGAATTACTGATGTAGTTCC	TAATACGACTCACTATAGGAATTACTGATGTAGTTCCGTTTTAGAGCTAGAAATAGCAAG	Extension - Gagnon et al., 2014
	c44	c45_nrxn3b CRISPR-04	3' of TransMembrane domain sequence	GTCTTTGGGTCTCTTGTTAC	TAATACGACTCACTATAGGCTTTGGGTCTCTTGTTACGTTTTAGAGCTAGAAATAGCAAG	Extension - Gagnon et al., 2014
tyr	tyr-marker TOP	C86-TYRO-Top	First exon	GGACTGGAGGACTTCTGGGG	TAATACGACTCACTATAGGACTGGAGGACTTCTGGGGGTTTTAGAGCTAGAAATAGCAAGTTAAAATAAGGCTAGTCCGTTATCAACTTGAAAAAGTGGCACCGAGTCGGTGCTTTT	Full length method
	tyr-marker BOT	C87-TYRO-Bottom	First exon		AAAAGCACCGACTCGGTGCCACTTTTTCAAGTTGATAACGGACTAGCCTTATTTTAACTTGCTATTTCTAGCTCTAAAACCCCCAGAAGTCCTCCAGTCCTATAGTGAGTCGTATTA	Full length method
