# Supplementary material
Source: publisher figshare collection journal article supplement (https://gsajournals.figshare.com/articles/dataset/_/15130656)
Supplement: Supplementary file 10 [file 1]

```
1A Part_F60_5R_228.txt-- Matches:368; Mismatches:4; Gaps:185; Unattempted:0
```

446>ctcggaaaaaatcaaatgtttccatccagaattatgctgttaattaatcgctgtttgtgttacgctg>512  
407>TTCGGA AAA ----- GGCC ----- TTGTG ----- TCGCAGT ----->433  
11<----- ACTGTTCC-----CC-----><1
