# Supplementary material
Source: publisher figshare collection journal article supplement (https://gsajournals.figshare.com/articles/dataset/_/15130656)
Supplement: Supplementary file 14 [file 1]

nrxn2a.ape  
Alignment to  
2A\_TMR\_F3\_8R\_210.txt-- Matches:188; Mismatches:14; Gaps:342; Unattempted:0

```

      *      *      *      *      *      *      *      *      *      *
1>~~~~~CCTGGTGTAGGCAAAAGTGGCCACGGTGACCACCGTCCTCCAGTCCCTGCCCCGACCACCCATCCTAACCAGTCCACATC>81
222<TCCTGGTTAGCAAAAGGCTCCTGGTGTAGGCAAAAGTGGCCACGGTGACCACCGTCCTCCAGTCCCTGCCCCGACCACCCATCCTAACCAGTCCACATC<123

      *      *      *      *      *      *      *      *      *      *
82>CCAGCGGGCAAAATGAACACCCGCGACCAGGTGCTCCTGCCACCCGTCCCGTCCTCGCGCCACACTCCAGGTCTAACCTACCCGCCTGATTTCCTCCCATG>181
122<CCAGCGGGCAAAATGAACACCCGCGACCAGGTGCTCCTGCCACCCGTCCCGTCCTCGCGCC-----<62

      *      *      *      *      *      *      *      *      *      *
182>TGCCCAAGCTCATCCACCGACCTGATGGAGAAGGGCCGTCCAGGTGCCGTGGAGGTGATTCGAGAGTCCAGCAGCACCACAGGCATGGTGGTTGGCAT>281
62<-----<62

      *      *      *      *      *      *      *      *      *      *
282>CGTGCGGGTGCCGCCCTCTGCATCCTCATCTCTATACGCCATGTATAAATACCGCAATCGAGACGAAGGCTCTTATCAGGTGGATCAAAGCCGCAAC>381
62<-----<62

      *      *      *      *      *      *      *      *      *      *
382>TCCGGCTCTGAAAGCAACGGTGCCGTAGTGAAGGAGAAAACGCCGAGTACGACTGCCCGCGTGGCTAAAACCACCACCAAGGGCAAGAAGAACAAAGACA>481
61<-----ACCACCACCAAGGGCAAGAAACACACACAC<31

      *      *      *      *
482>AGGAGTATTACGTCTGAG-AAAGACAGAGGAGAAGGTACTGATG>524
30<AGCAACTA-----GAGCAATGACACACAGAGA-----GATG<1
```
