# Supplementary material
Source: publisher figshare collection journal article supplement (https://gsajournals.figshare.com/articles/dataset/_/15130656)
Supplement: Supplementary file 18 [file 1]

Chromatogram

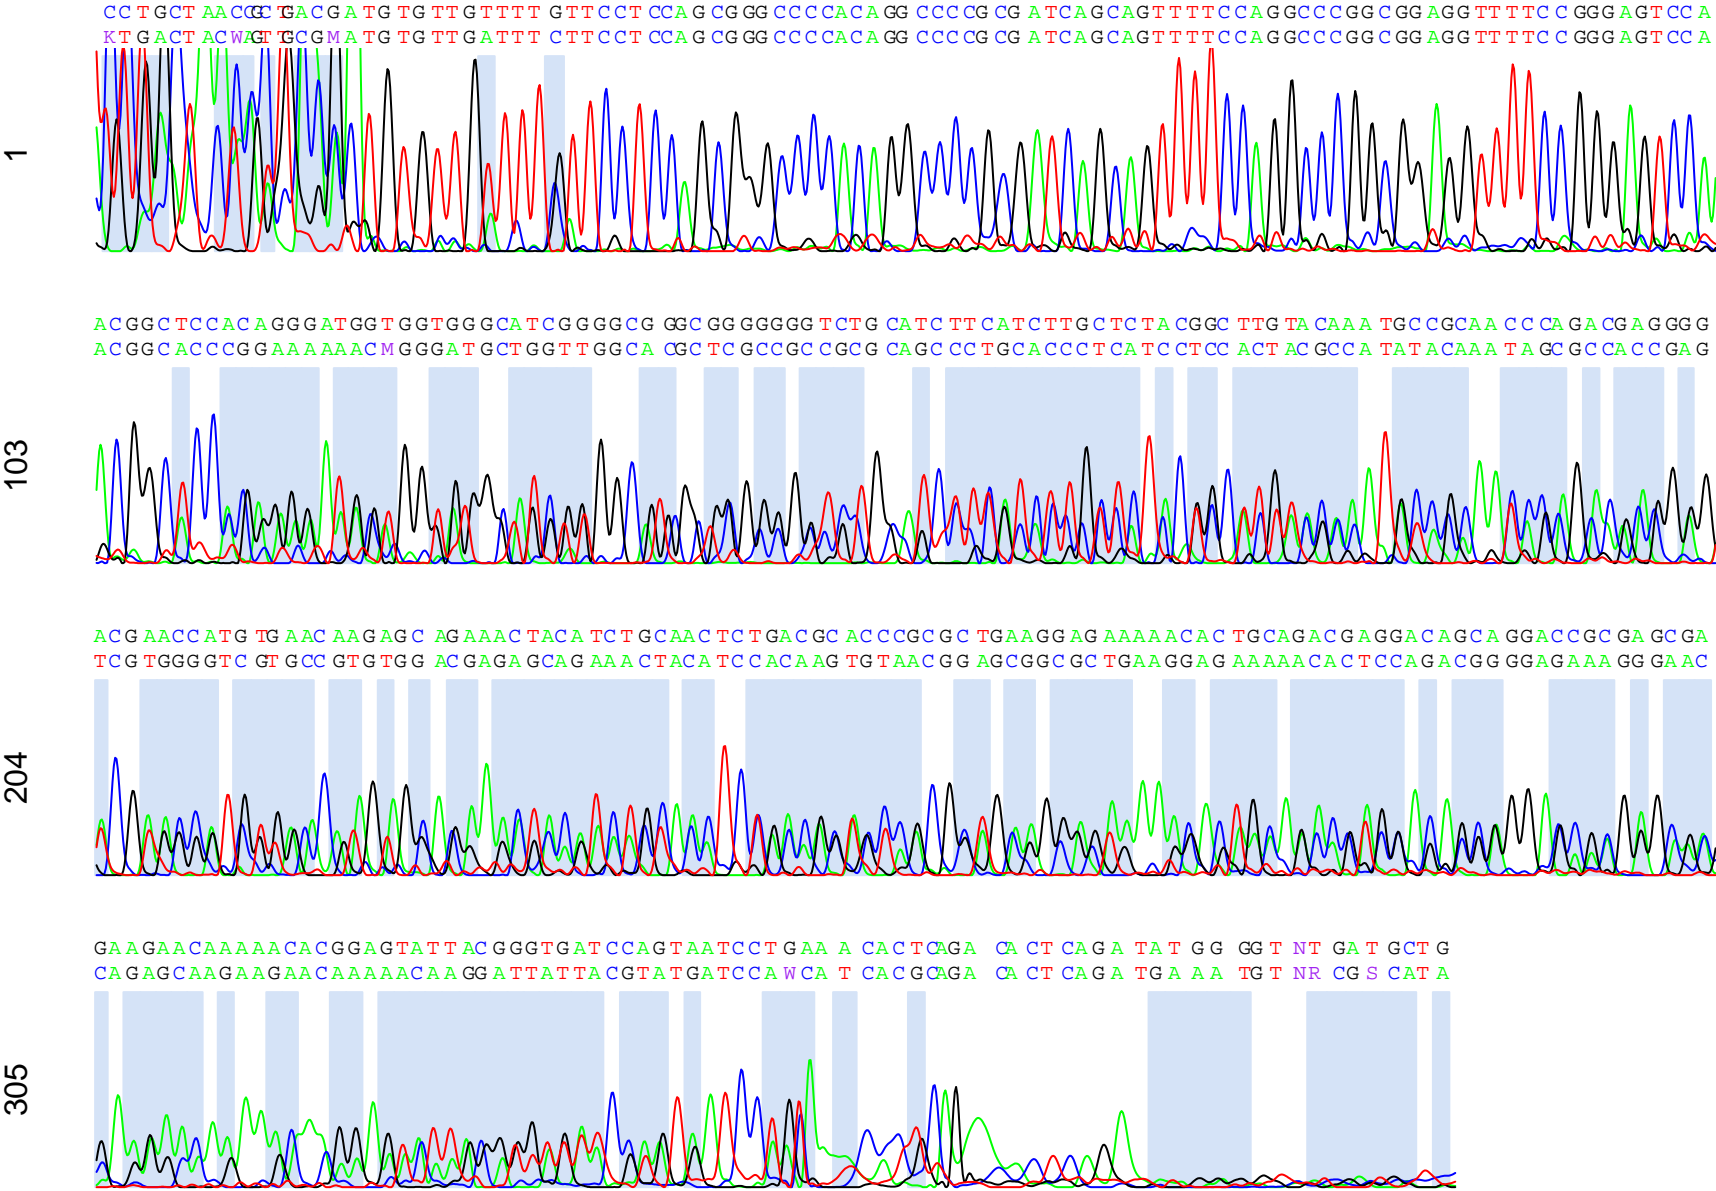

## Alignment

Warning in setAllelePhase(data, refseq, trim5, trim3): Reference sequence does not encompass sequencing results.  
Ambiguous bases will be attributed to both alleles outside the region covered by the reference sequence.

|            |     |                                                                                  |     |
|------------|-----|----------------------------------------------------------------------------------|-----|
| Alt Allele | 1   | BYKRCTAMHMGYTGCGRATGTGTTGATTTCTTCCTCCAGCGGGCCCCACAGGCCCCGCGATCAGCAGTTTTCCAGGCCCG | 80  |
| Reference  | 31  | BYKRCTAMHMGYTGACCATGTGTTGTTTGTTCCTCCAGCGGGCCCCACAGGCCCCGCGATCAGCAGTTTTCCAGGCCCG  | 110 |
| Alt Allele | 81  | GCGGAGGTTTTCCGGGAGTCCAACGGCTCCCGGAAAAAACMGGGATGCTGGTGGGCA-CGCTGGCGGGCGCGCAGCTCTG | 159 |
| Reference  | 111 | GCGGAGGTTTTCCGGGAGTCCAACGGCACC-----ACAGGGATGGTGGTGGGCATCG-TGGCGGGCGCGCGCTCTG     | 181 |
| Alt Allele | 160 | CATCCTCATCCTGCTCTACGCCATGTACAAATACCGCCACCGAGACGAGGGGTCTGACCATGTGGACGAGAGCAGAACT  | 239 |
| Reference  | 182 | CATCCTCATCCTGCTCTACGCCATGTACAAATACCGCAACCGAGACGAGGGGTCTGACCATGTGGACGAGAGCAGAACT  | 261 |
| Alt Allele | 240 | ACATCTGCAACTCTAACGGAGCGGCGCTGAAGGAGAAAAACACTGCAGACGA-----GGASMRMGRGMRMSARRMM     | 311 |
| Reference  | 262 | ACATCTGCAACTCCAACGGAGCCGCGCTGAAGGAGAAAAACACTGCAGACGACGACGCGGGASMRMGRGMRMSARRMM   | 341 |
| Alt Allele | 312 | ARAARMACRRARWMWWSRKKKWWCSWRTRATCCWDMAWCACKCAGACACTCAGATWRRKGTNDSRBSMTR           | 384 |
| Reference  | 342 | ARAARMACRRARWMWWSRKKKWWCSWRTRATCCWDMAWCACKCAGACACTCAGATWRRKGTNDSRBSMTR           | 414 |

## Alternative allele

BYKRCTAMHMGYTGCGRATGTGTTGATTTCTTCCTCCAGCGGGCCCCACAGGCCCCGCGATCAGCAGTTTTCCAGGCCCGCGGAGGTTTTCCGGGAGTCCAACGGCTCCCGGAAAAAAC  
MGGGATGCTGGTGGGCACGCTGGCGGGCGCGCAGCTCTGCATCCTCATCCTGCTCTACGCCATGTACAAATACCGCCACCGAGACGAGGGGTCTGACCATGTGGACGAGAGCAGAACTA  
CATCTGCAACTCTAACGGAGCGGCGCTGAAGGAGAAAAACACTGCAGACGAGGASMRMGRGMRMSARRRMMARAARMACRRARWMWWSRKKKWWCSWRTRATCCWDMAWCACKCAGAC  
ACTCAGATWRRKGTNDSRBSMTR

## Reference sequence

GCTAGYAKCTRYAGYTRTSTATMWMWTVAWBYKRCTAMHMGYTGACCATGTGTTGTTTGTTCCTCCAGCGGGCCCCACAGGCCCCGCGATCAGCAGTTTTCCAGGCCCGCGGAGGTTT  
TCCGGGAGTCCAACGGCACACAGGGATGGTGGTGGGCATCGTGGCGGGCGCGGCGCTCTGCATCCTCATCCTGCTCTACGCCATGTACAAATACCGCAACCGAGACGAGGGGTCTGACC  
ATGTGGACGAGAGCAGAACTACATCTGCAACTCCAACGGAGCCGCGCTGAAGGAGAAAAACACTGCAGACGACGACGCGGGASMRMGRGMRMSARRRMMARAARMACRRARWMWWSR  
KKKWWCSWRTRATCCWDMAWCACKCAGACACTCAGATWRRKGTNDSRBSMTRYTMHTMHTACKHMDWCMGAAKMKAMGAA

## Alignment parameters

```
#####  
# Program: Biostrings (version 2.42.1), a Bioconductor package  
# Rundate: Fri Jul 23 07:45:25 2021  
#####  
#=====  
#  
# Aligned_sequences: 2  
# 1: Alt Allele  
# 2: Reference  
# Matrix: NA  
# Gap_penalty: 12.0  
# Extend_penalty: 2.0  
#  
# Length: 393  
# Identity:      362/393 (92.1%)  
# Similarity:    NA/393 (NA%)  
# Gaps:          18/393 (4.6%)  
# Score: 1250.908
```
