# Supplementary material
Source: publisher figshare collection journal article supplement (https://gsajournals.figshare.com/articles/dataset/_/15130656)
Supplement: Supplementary file 24 [file 1]

Alignment to

```
1B_Full_26-5F_215.txt-- Matches:230; Mismatches:5; Gaps:211; Unattempted:0
1B_Full_26-5R_217.txt-- Matches:230; Mismatches:5; Gaps:210; Unattempted:0
```

\* \* \* \*  
 400>ATCACAAC~~TTTGGAAATAAACTCGCTGTTTCTTGTA~~-TAAC~~TTACG~~->444  
 191>ATCACAAC~~TTTGGAAATGA~~ACTCGCTG~~TTTCTTGTA~~AA~~TTACG~~TAACGA->237  
 15<-----TGCA-TA-----GCAGAT-----G-----AA-----<1
