# Supplementary material
Source: publisher figshare collection journal article supplement (https://gsajournals.figshare.com/articles/dataset/_/15130656)
Supplement: Supplementary file 27 [file 1]

nrxn3a-tmr region.ape

Alignment to

3A\_TMR\_F16\_2F\_205.txt-- Matches:344; Mismatches:4; Gaps:223; Unattempted:0

3A\_TMR\_F16\_2R\_206.txt-- Matches:342; Mismatches:5; Gaps:223; Unattempted:0

```

      *      *      *      *      *      *      *      *      *      *
1>CGACATAGTCTTGCTTCCATTGCCCACTTCCTATGAGGTAGACAACACAAAGCTGAAGAGCCCATTAATAACCTCCCCCATGTTCCGTAATGTACCCACA>100
1>AGAATA-----CC--GC-----TGAG-----CAGCTGAAGAGCCCATTAATAACCTCCCCCAT----->49
347<-----ATAGTCTTGCTTCCATTGCCCACTTCCTATGAGGTAGACAACACAAAGCTGAAGAGCCCATTAATAACCTCCCCCAT-----<271
```

```

      *      *      *      *      *      *      *      *      *      *
101>GCAATCCCCACGGAGCCGGGCATCAGGCGGGTTCGGGGGCCTCCGAGGTGGTCCGTGAATCTAGCAGCACACCAGGAATGGTCGTCGGGATAGTTGCCG>200
49>----->49
271<-----<271
```

```

      *      *      *      *      *      *      *      *      *      *
201>CTGCCGCTTTGTGCATCCTAATTCTGCTCTACGCCATGTATAAGTACAGAAACAGGGACGAGGGGTCTTACCAAGTGGATGAGACCAGGAATTACATTAC>300
50>-----CAAGTGGATGAGACCAGGAATTACATTAC>78
270<-----CAAGTGGATGAGACCAGGAATTACATTAC<242
```

```

      *      *      *      *      *      *      *      *      *      *
301>CAACTCGGCGCAGAGCAATGGCGCGGTTCATGAAGGACAAGCAGCAGAGCACCAAAAGCGGCAACAAGAAACAGAAAAACAAGGACAAGGAGTACTACGTG>400
79>CAACTCGGCGCAGAGCAATGGCGCGGTTCATGAAGGACAAGCAGCAGAGCACCAAAAGCGGCAACAAGAAACAGAAAAACAAGGACAAGGAGTACTACGTG>178
241<CAACTCGGCGCAGAGCAATGGCGCGGTTCATGAAGGACAAGCAGCAGAGCACCAAAAGCGGCAACAAGAAACAGAAAAACAAGGACAAGGAGTACTACGTG<142
```

```

      *      *      *      *      *      *      *      *      *      *
401>TGAGTCCGAGCCACAGAACTTTAACAGACAGACAGACAGATGGACCTGTTGGGCACTGCGCCAAGAGAGAGGGCGACAGGAGCCCAACCTGGCGCCGTG>500
179>TGAGTCCGAGCCACAGAACTTTAACAGACAGACAGACAGATGGACCTGTTGGGCACTGCGCCAAGAGAGAGGGCGACAGGAGCCCAACCTGGCGCCGTG>278
141<TGAGTCCGAGCCACAGAACTTTAACAGACAGACAGACAGATGGACCTGTTGGCACTGCGCCAAGAGAGAGGGCGACAGGAGCCCAACCTGGCGCCGTG<42
```

```

      *      *      *      *      *      *      *
501>CCGAGAAGGCGAACTCTGACGCGAACTGTACCATAAAGCACACTTACAACAGTAAGCATACCGCGAAAGG~>570
279>CCGAGAAGGCGAACTCTGACGCGAACTGTACCATAAAGCACACTTACAACAGTAAGCATACCGCGAAAGGA>349
41<CCGAGAAGGCGAACTCTGACGCG-----AGAAC-----ACAGTAAGCTT-----G~<1
```
