# Supplementary material
Source: publisher figshare collection journal article supplement (https://gsajournals.figshare.com/articles/dataset/_/15130656)

File: 1B\_Partial\_36-3R\_161.ab1 Run Ended: 2020/11/24 21:54:13 Signal G:1465 A:3067 C:6716 T:2914  
 Sample: 1B\_Partial\_36-3R\_161 Lane: 95 Base spacing: 13.175449 363 bases in 4333 scans Page 1 of 1

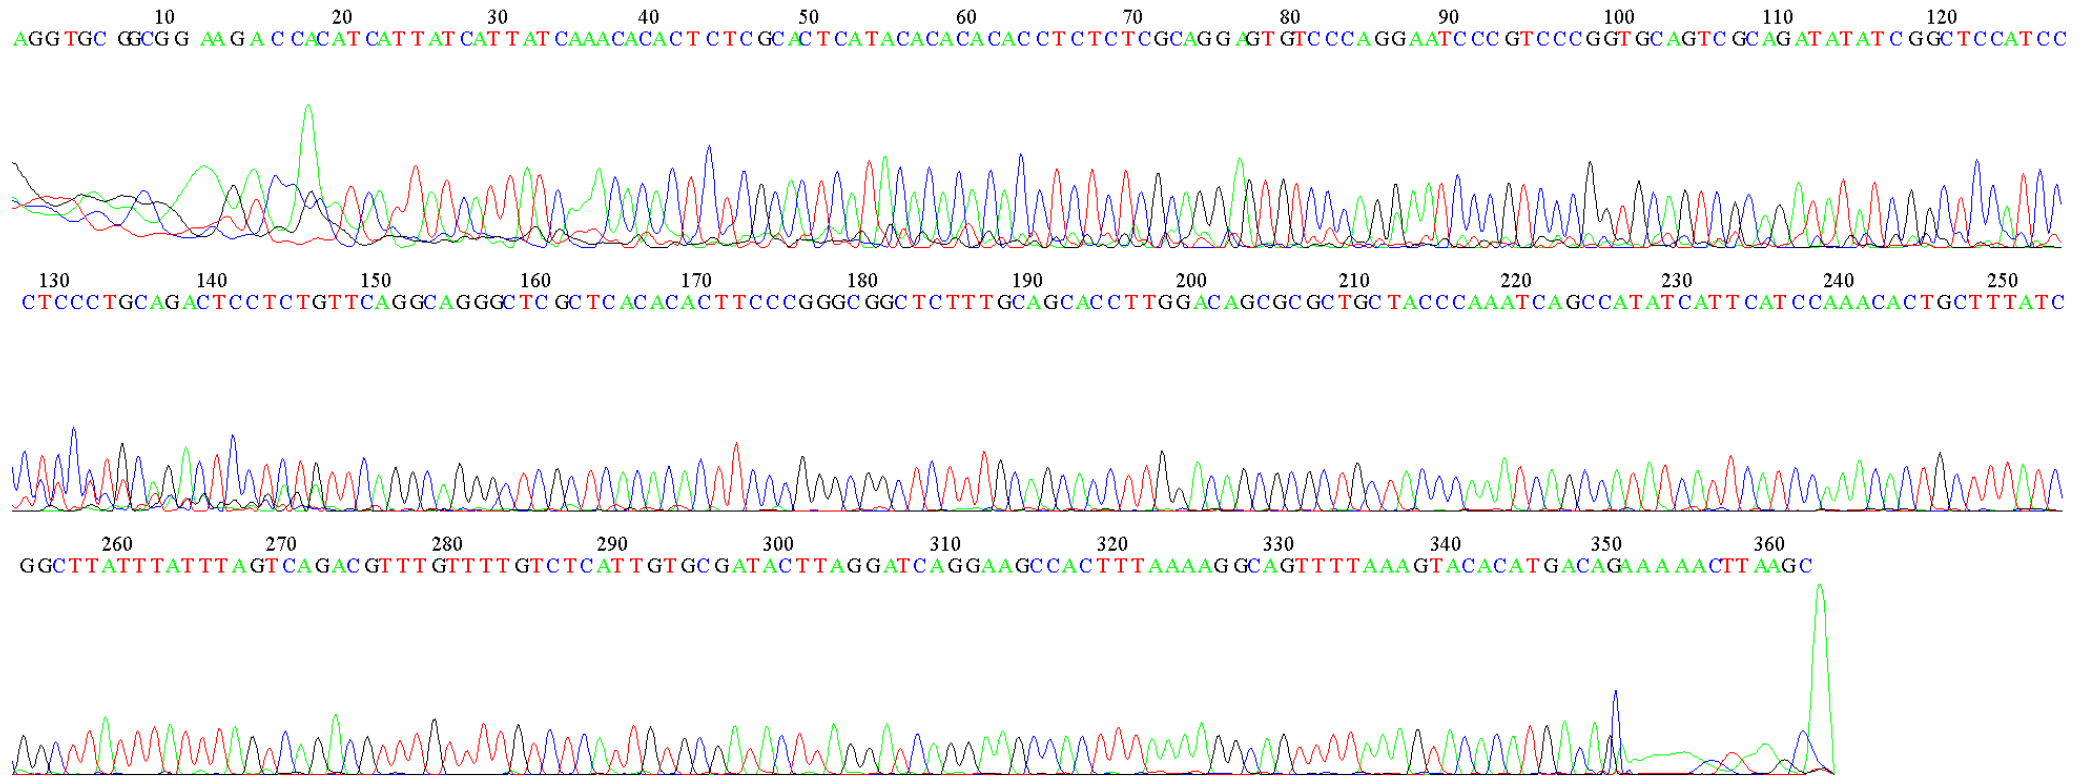

Supplement: Supplementary file 30 [file 1]
