# Supplementary material
Source: publisher figshare collection journal article supplement (https://gsajournals.figshare.com/articles/dataset/_/15130656)
Supplement: Supplementary file 34 [file 1]

nrxn2b\_tmr.ape  
Alignment to  
2B\_TMR\_7-3F\_211.txt-- Matches:241; Mismatches:1; Gaps:286; Unattempted:0  
2B\_TMR\_7-3R\_212.txt-- Matches:250; Mismatches:0; Gaps:283; Unattempted:0

```

      *      *      *      *      *      *      *      *
1>---GCTCAAACCGGGCATCAA-TGCGCCCAACAT-CCCCGCGGGTAAATGAACACTCGAGATCAGGTGCTGCTGCCGCCCTGCTCAGCCCTCGGGGCGACA>95
1>-----T-CCGCGGTTAAATGACACTCGAGATCAGGTGCTGCTGCCGCCCTGCTCAGCCCTCGGGGCGACA>62
255<TTGGCTCAAACCGGGCATCAAATGCGCCCAACATCCCCGCGGGTAAATGAACACTCGAGATCAGGTGCTGCTGCCGCCCTGCTCAGCCCTCGGGGCGACA<156
```

```

      *      *      *      *      *      *      *      *
96>CTGATCACAGCGGGCGGCATCGACACATCCCAGGTATAACATATCCCCCTAATTTCCCCCATGTGCCCACTACAGACCCCTCATCGCCGGACCGAGGGCC>195
63>CTGATCACAGCGGGCGGCATCGACACATCCCAGGTATAACATATCCCCCTAATTTCCCCCA----->123
155<CTGATCACAGCGGGCGGCATCGACACATCCCAGGTATAACATATCCCCCTAATTTCCCCCATGTGCCCACTACAGACCCCTCATCGCCGGACCGAGGGCC<56
```

```

      *      *      *      *      *      *      *      *
196>GCC TGGAGCGTGGAGGTGATCCGAGAGTCCAGCAGTACCACGGGTATGGTGGTGGGCATCGTGGCAGCGGCTGCCCTCTGCATCCTCATCTGCTGTAC>295
123>----->123
55<GCCTGGAGCGTGGAGGTGATCCGAGAGTCCAGCAGTACCACGGGT-----TA<8
```

```

      *      *      *      *      *      *      *      *
296>GCCATGTACAAGTACCGCAACCGCGACGAAGGCTCCTACCAGTGGACCAGAGCCGCAATTACATTAGCAATTCAGCCACGCAAAGCAATGGCGCCCTAG>395
123>----->123
7<-----GCT-----CAA-----<2
```

```

      *      *      *      *      *      *      *      *
396>TGAAGGAGAAACAGCCCGGCGCTGCCAAGACGGGCACCAAGAGCAAGAAAAACAAAGACAAGGAGTATTACGTCTGAGCACGGCCCCCTAGGGGGACCCGA>495
124>---GGAGAAACAGCCCGGCGCTGCCAAGACGGGCACCAAGAGCAAGAAAAACAAAGACAAGGAGTATTACGTCTGAGCACGGCCCCCTAGGGGGACCCGA>219
2<-----<2
```

```

      *      *      *      *
496>GGGGAGAAGGAGAGAGATAGGATGAGGACTGGA>528
220>GGGGAGAAGGAGAGAGATAGC-----GA>242
1<-----A<1
```
