# Supplementary material
Source: publisher figshare collection journal article supplement (https://gsajournals.figshare.com/articles/dataset/_/15130656)

File: 1B\_Partial\_36-3F\_213.ab1 Run Ended: 2020/11/24 21:54:13 Signal G:2442 A:3703 C:6176 T:3154  
 Sample: 1B\_Partial\_36-3F\_213 Lane: 66 Base spacing: 12.91344 358 bases in 4326 scans Page 1 of 1

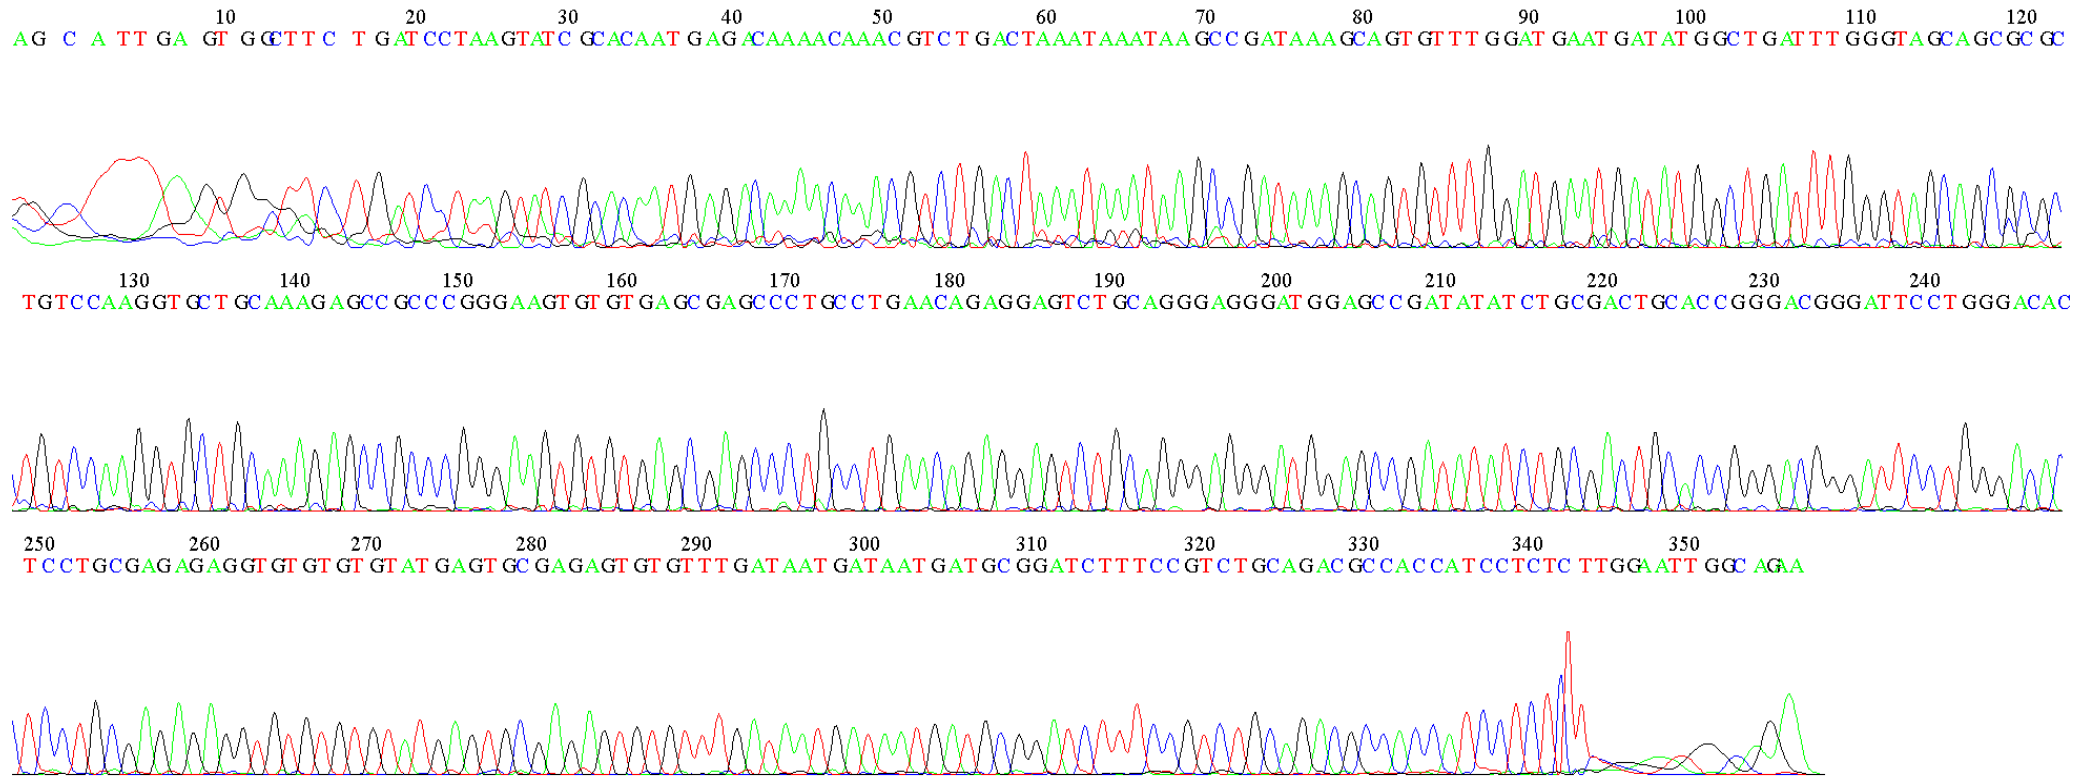

Supplement: Supplementary file 38 [file 1]
