# Supplementary material
Source: publisher figshare collection journal article supplement (https://gsajournals.figshare.com/articles/dataset/_/15130656)
Supplement: Supplementary file 39 [file 1]

nrxn1A.ape  
Alignment to  
1A\_Full1\_32-2R\_215.txt-- Matches:274; Mismatches:4; Gaps:103; Unattempted:0

```

      *      *      *      *      *      *      *      *
1>~GCATAGA-CTTCGAGTGTTCATGTTGTTTCATAAATGAACATTGGGATGCAAGAATTGATAATAGTCTTGTATAGTAACCGATGCCATGTTTGAATGCTG>98
280<AGCATAGACCTCGAGTGTTCATGTTGTTTCATAAATGAACATTGGGATGCAAGAATTGATAATAGTCTTGTATAGTAACCGATGCCATGTTTGAATGCTG<181

      *      *      *      *      *      *      *      *
99>CACCACATTTTGACAGATAAACCTTTTTTCATTTCCCTTTCTTTCTTTTGGATACGCATGACCGGTTCACTCATATATGTAATGTTGACTAATAGG>198
180<CACCACATTTTGACAGATAAACCTTTTTTCATTTCCCTTTCTTTCTTTTGGATACGCATGACCGGTTCACTCATATATGTAATGTTGACTAATAGG<81

      *      *      *      *      *      *      *      *
199>AGCTCATTCCTTCGTAAATAGCTTTGAAGCACAGCAATGAAACAGAGAAGACCATACTGGCAATTTAGCTGGAAATAGnnnnnnnnnnnnnnnnCCGGGGCC>298
80<AGCTCATTCCTTCGTAAATAGCTTTGAAGCACAGCAATGAAACAG-----<36

      *      *      *      *      *      *      *      *
299>ATTCGGAATAGATTGAGGAAAACTCCATGCACGTAAAGTATCTTATTACATGTTTATATACGGTGCAAAGACTATCTGTG>379
35<-----GAAAAACTCCATGCACGTAAAGTATC-----CAAACCCE-C-C<1
```
