# Supplementary material
Source: publisher figshare collection journal article supplement (https://gsajournals.figshare.com/articles/dataset/_/15130656)
Supplement: Supplementary file 44 [file 1]

nrxn1A.ape  
Alignment to  
1A\_TMR\_F8\_2F\_179.txt-- Matches:165; Mismatches:2; Gaps:209; Unattempted:0  
1A\_TMR\_F8\_2R\_180.txt-- Matches:168; Mismatches:2; Gaps:203; Unattempted:0

```

      *      *      *      *      *      *      *      *      *      *
1>nnataaacgtctctctcttctccnnagtactccttgctccttggtctcttaaacgtctctctcttctccctttctgtctacagctcaccaccacttcccgag>100
1>-----CCT-----ACCCACCACCTTCCGAG>19
170<-----TCATAACGCTCTCCTTTCTCCCTTTCTGTCTACAGCTCACCCACCACCTTCCCGAG<114
```

```

      *      *      *      *      *      *      *      *      *      *
101>gccaagggttacccgagcccagaggtgattcgggagtcagcagcaccacgggcatggtcgtagcatcgttgccagccgctgcactctgcacctaacc>200
20>GCAAGGGTTACCCGAGCCCAGA----->41
113<GCCAAGGGTTACCCGAGCCCAGA-----<91
```

```

      *      *      *      *      *      *      *      *      *      *
201>tgtctacgccatgtacaaatacacaaaaccgacgaagggctcttaccacgtggacgagagtcgtaactacattagtaattctgccacgcagcccaatgg>300
42>-----CACGTGGACGAGAGTCGTAACCTACATTAGTAATTCTGCCACGC-----GCCCAATGG>94
90<-----CACGTGGACGAGAGTCGTAACCTACATTAGTAATTCTGCCACGCAGCCCAATGG<38
```

```

      *      *      *      *      *      *      *
301>agctgccgtcaaagaaaagcccatcgccgtgccccaaaaataaaaaagataaaaaagaacaaggacaaggaggtac~~~>373
95>AGCTGCCGTCAAAGAAAAGCCCATCGGCGTGCCCCAAAAATAAAAAAGATAAAAAAGACAAGACAAGGAGTACAAA>170
37<AGCTGCCGTCAAAGAAAAGCCCATCGCTCCCA-----ACAA-----A~~~~~<1
```
