# Supplementary material
Source: publisher figshare collection journal article supplement (https://gsajournals.figshare.com/articles/dataset/_/15130656)
Supplement: Supplementary file 45 [file 1]

nrxn3b-tmr region.ape  
Alignment to  
3B\_TMR\_20-4F\_207.txt-- Matches:152; Mismatches:3; Gaps:352; Unattempted:0  
3B\_TMR\_20-4R\_208.txt-- Matches:153; Mismatches:1; Gaps:353; Unattempted:0

\* \* \* \* \*  
1>---CCAAAATCCCAGCAGGGAAAAATGAATAACCGCGAGGTCAAACCCCAACCG-GATATAGTGCTGCTGCCGCTCCCCACGTCTTTCGATATGGATGGCA>96  
1>-----GGA---GA---C-----ACCTACCGGATATAGTGCTGCTGCCGCTCCCCACGTCTTTCGATATGGATGGCA>63  
157<AGTCCAAAATCCCAGCAGGGAAAAATGAATAACCGCGAGGTCAAACCCCAACCG-GATATAGTGCTGCTGCCGCTCCCCACGTCTTTCGATATGGATGGCA<59

\* \* \* \* \*  
97>CCAAACCGAAGGGGCCGTACATCACACAGCCCATGTTGCGGACCATCCCCAGTGCCCTACCCACTGTGCCAGGTATCAGGAGAGTGCCCCCTGGTGCCTC>196  
64>CCAAACC----->70  
58<CCAAACC-----<52

\* \* \* \* \*  
197>GGAGGTAATACGAGAGTCCAGCAGCACTACGGGCATGGTGGTGGGTATCGTTTCTGCTGCTGCTCTTTCATTCTCATCTTCTCTATGCCATGTACAAA>296  
70>----->70  
52<-----<52

\* \* \* \* \*  
297>TACAGAAACAGGGACGAGGGTTCCTATCAGGTAGATGAAACCCGGAACACATCAGTAATTCGGCACAGAATAACGGCACAGTAGTGAAAGACAAACAGC>396  
70>----->70  
52<-----<52

\* \* \* \* \*  
397>CCAGCACTAAAGGTGCCAGTAACAAGAGACCCAAAGACAAGGACAAGGAATACTATGTATAAAAGAACATTCCAATGACAAAACACAGAGACAGAGCAAC>496  
71>-----CAAGAGACCCAAAGACAAGGACAAGGAATACTATGTATAAAAGAACATTCCAATGACAAAACACAGAGACAGAGCAAC>148  
51<-----CAAGAGACCCAAAGACAAGGACAAGGAATACTATGTATAAAAGAACATTCCAATGACAAAACACAGAGACAGAGCAAC>1

\*  
497>ATCTGAGA~~>504  
149>ATCTGAGAGG>158  
1<~~~~~<1
