# Supplementary material
Source: publisher figshare collection journal article supplement (https://gsajournals.figshare.com/articles/dataset/_/15130656)

File: WTForward\_179.ab1 Run Ended: 2020/8/7 2:32:51 Signal G:2893 A:5893 C:9699 T:3363  
 Sample: WTForward\_179 Lane: 61 Base spacing: 12.330772 300 bases in 3768 scans Page 1 of 1

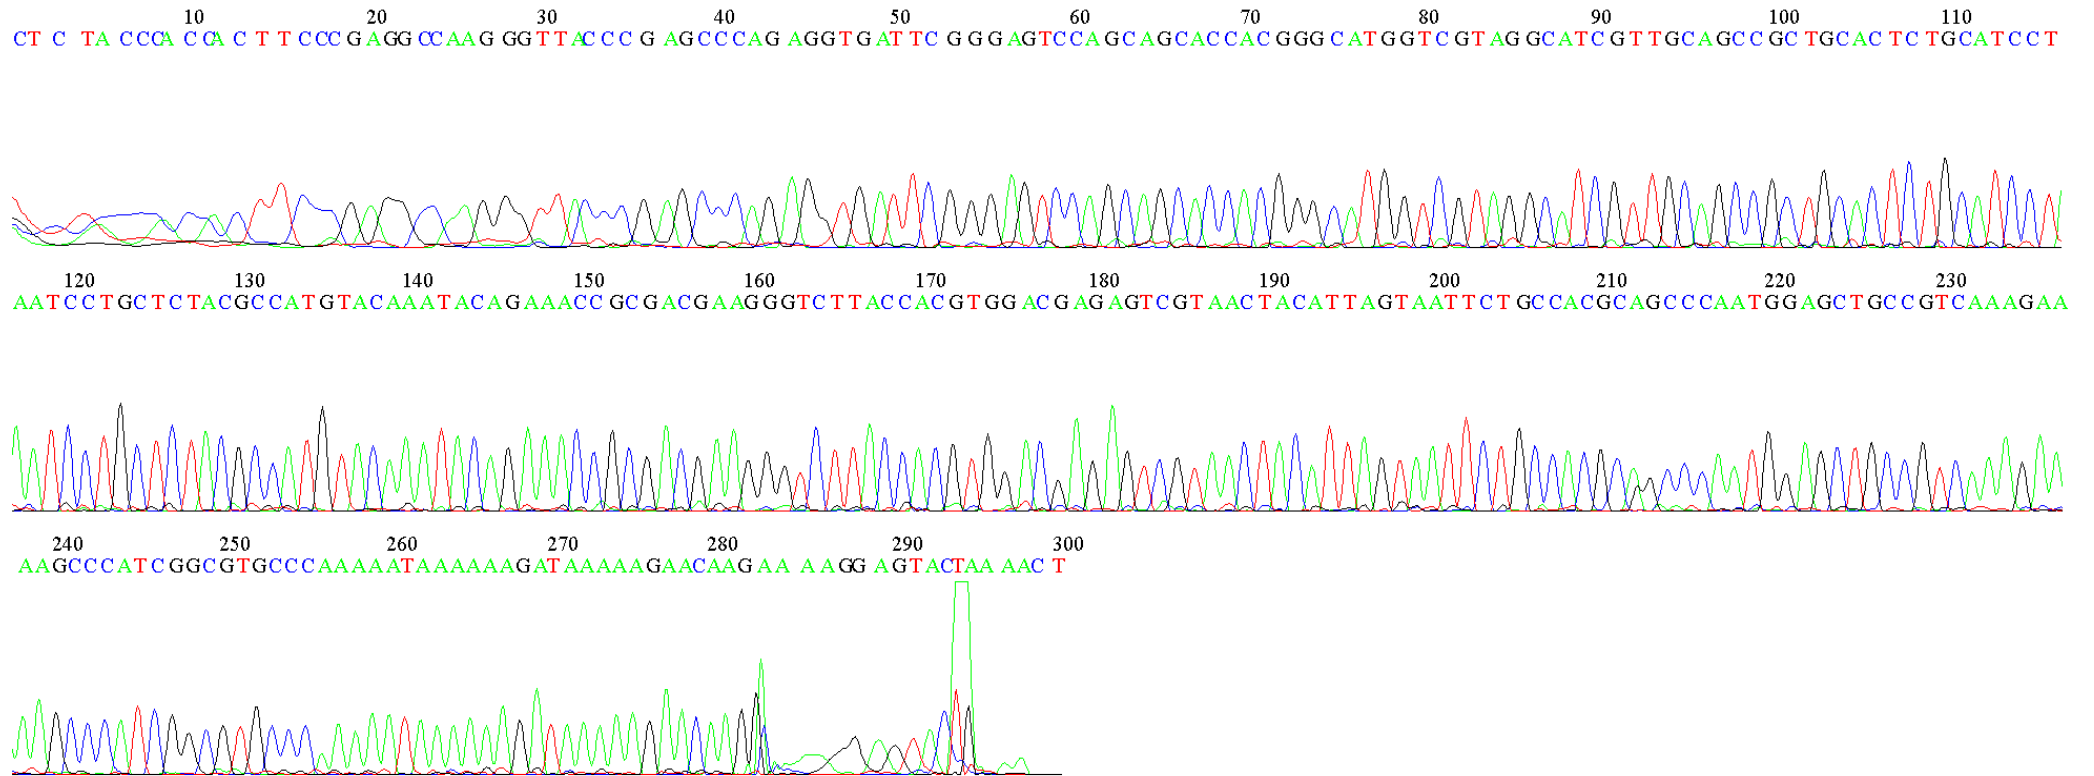

Supplement: Supplementary file 68 [file 1]
