# Supplementary material
Source: publisher figshare collection journal article supplement (https://gsajournals.figshare.com/articles/dataset/_/15130656)

File: 1B\_TMR\_5-7R\_225.ab1 Run Ended: 2021/2/9 21:56:5 Signal G:749 A:1408 C:3442 T:1362  
 Sample: 1B\_TMR\_5-7R\_225 Lane: 54 Base spacing: 13.273698 400 bases in 4821 scans Page 1 of 1

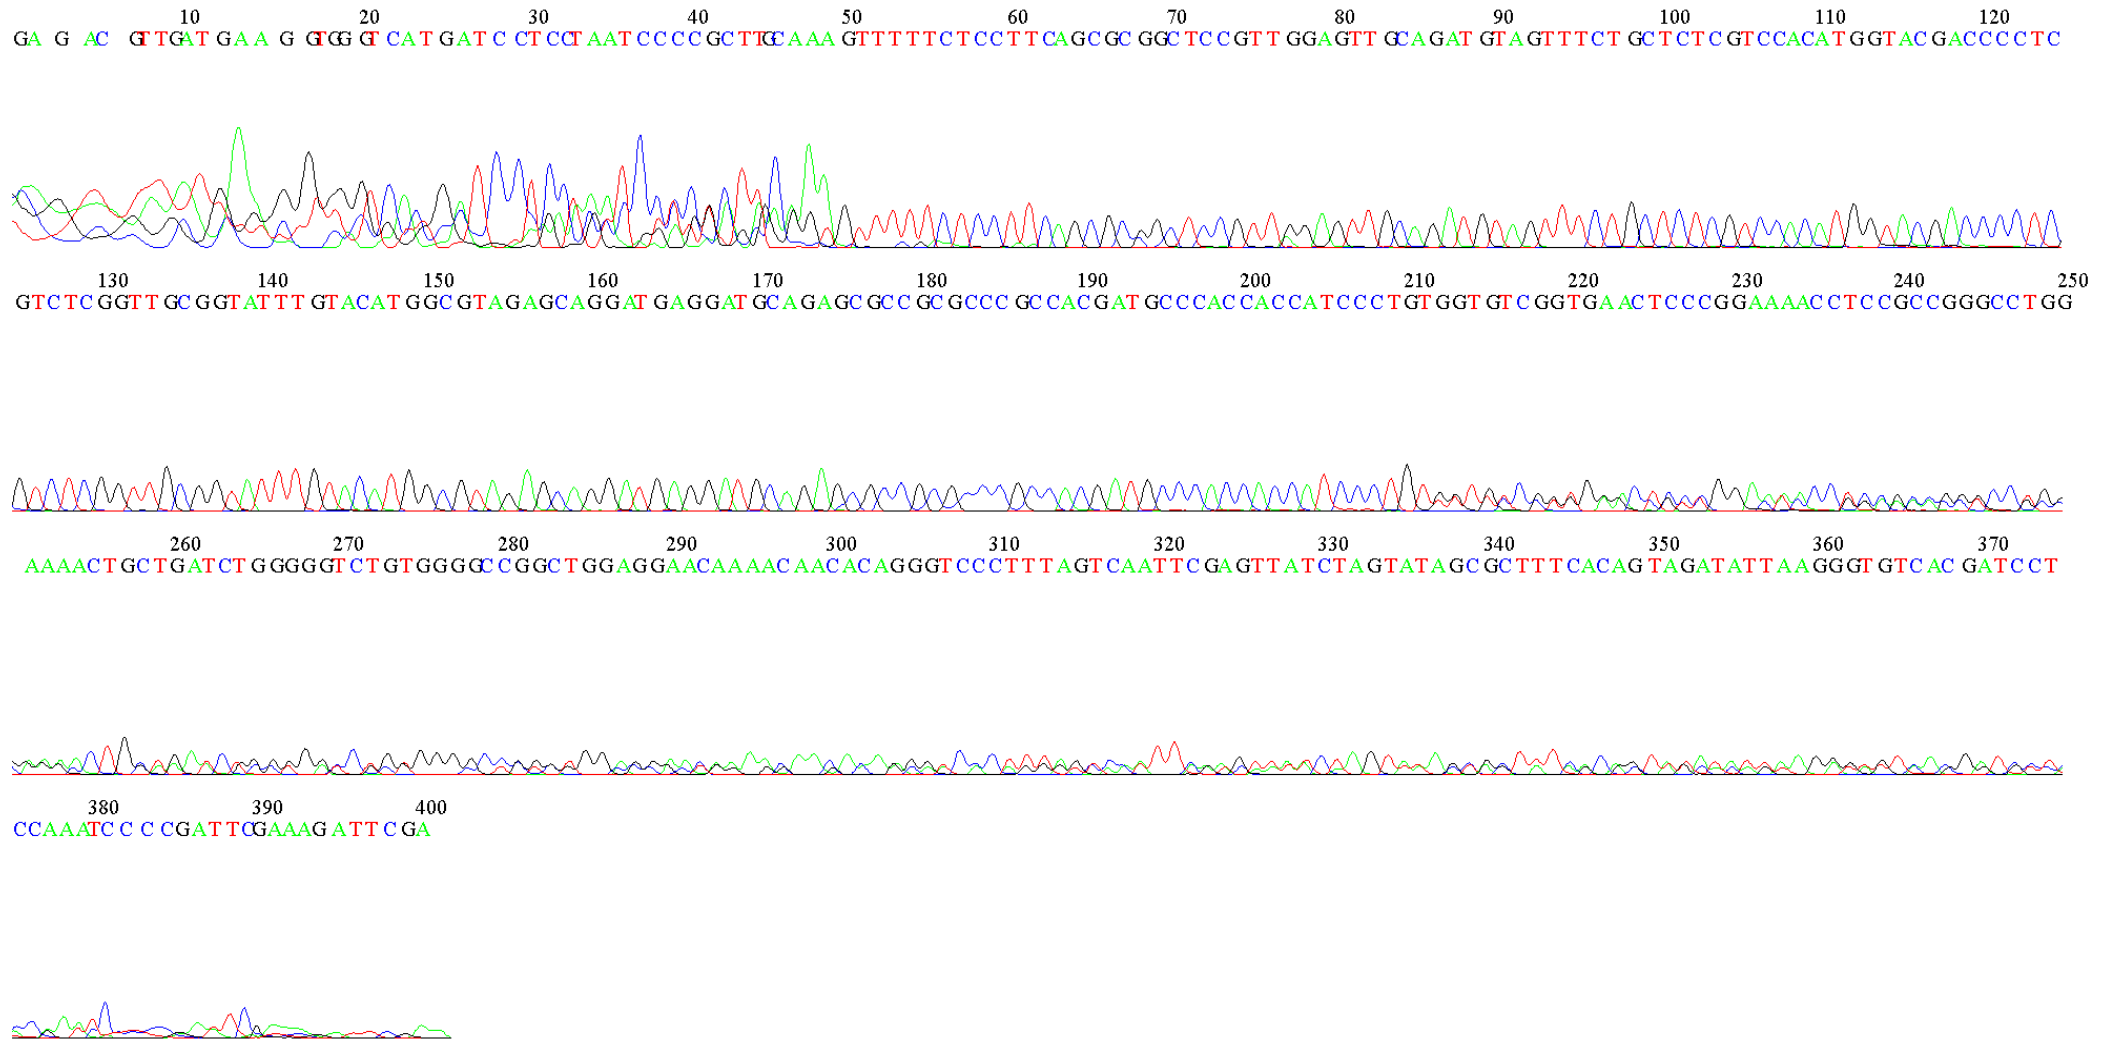

Supplement: Supplementary file 4 [file 1]

File: 3A\_TMR\_F16\_2F\_205.ab1 Run Ended: 2021/4/20 21:59:28 Signal G:363 A:699 C:864 T:307  
Sample: 3A\_TMR\_F16\_2F\_205 Lane: 73 Base spacing: 13.121104 349 bases in 4204 scans Page 1 of 1

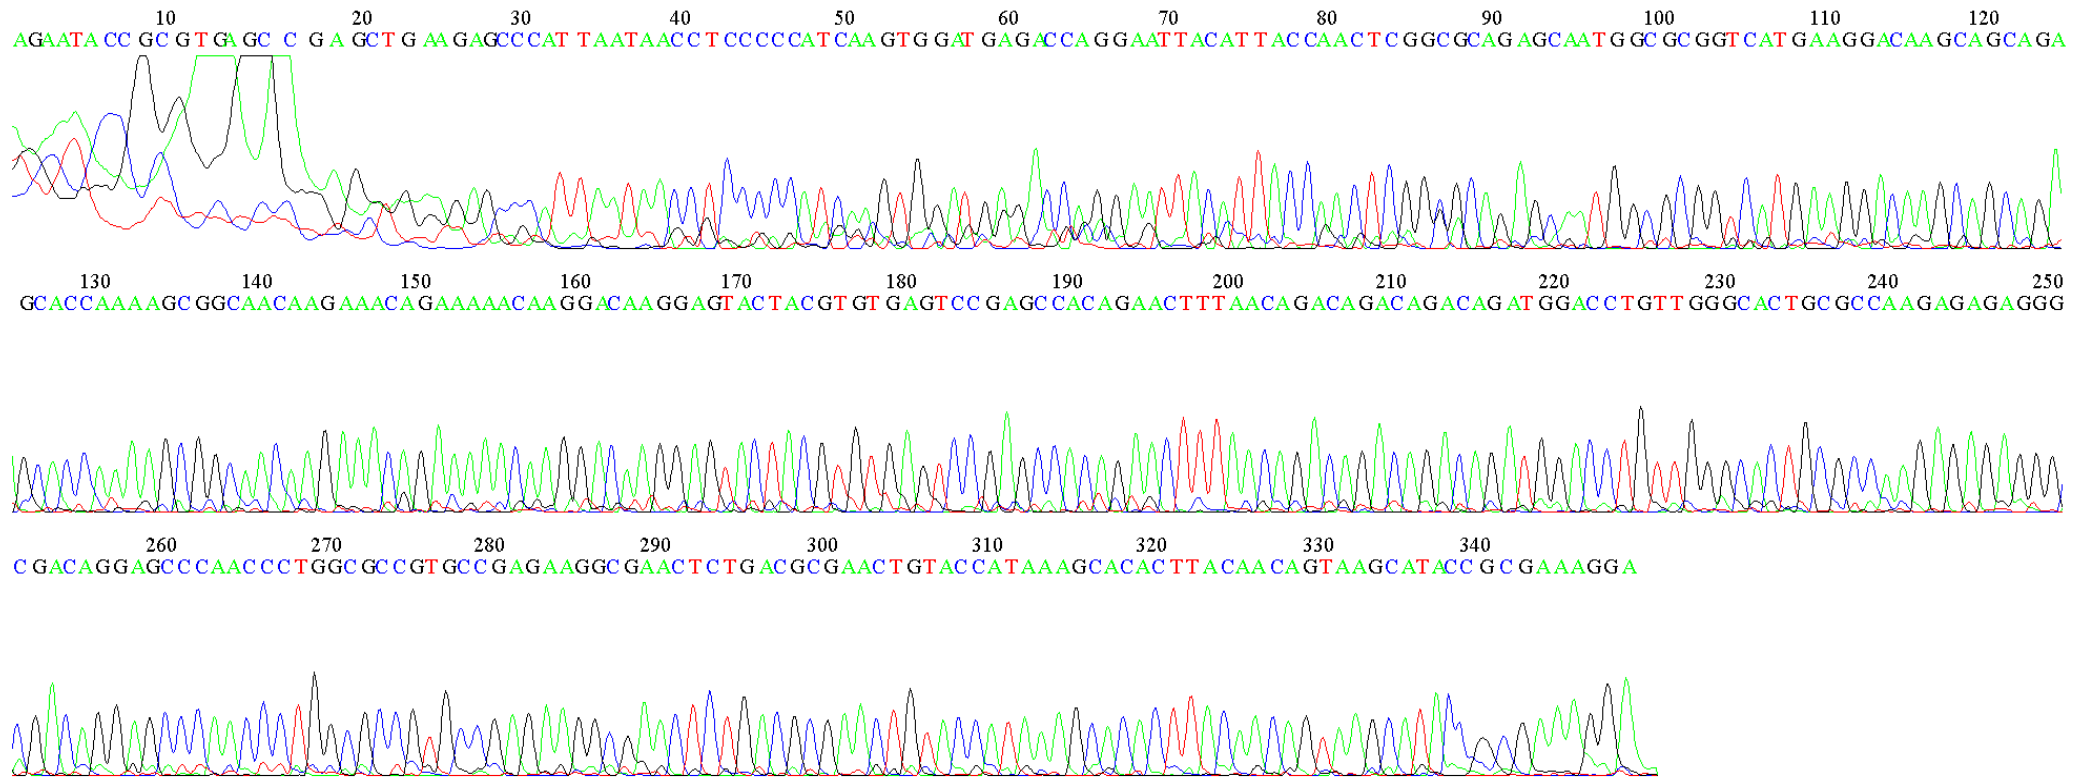

Supplement: Supplementary file 6 [file 1]

File: 17-2Reverse\_180.ab1 Run Ended: 2020/8/7 2:32:51 Signal G:1833 A:2761 C:4224 T:2395  
 Sample: 17-2Reverse\_180 Lane: 20 Base spacing: 12.73686 387 bases in 4687 scans Page 1 of 1

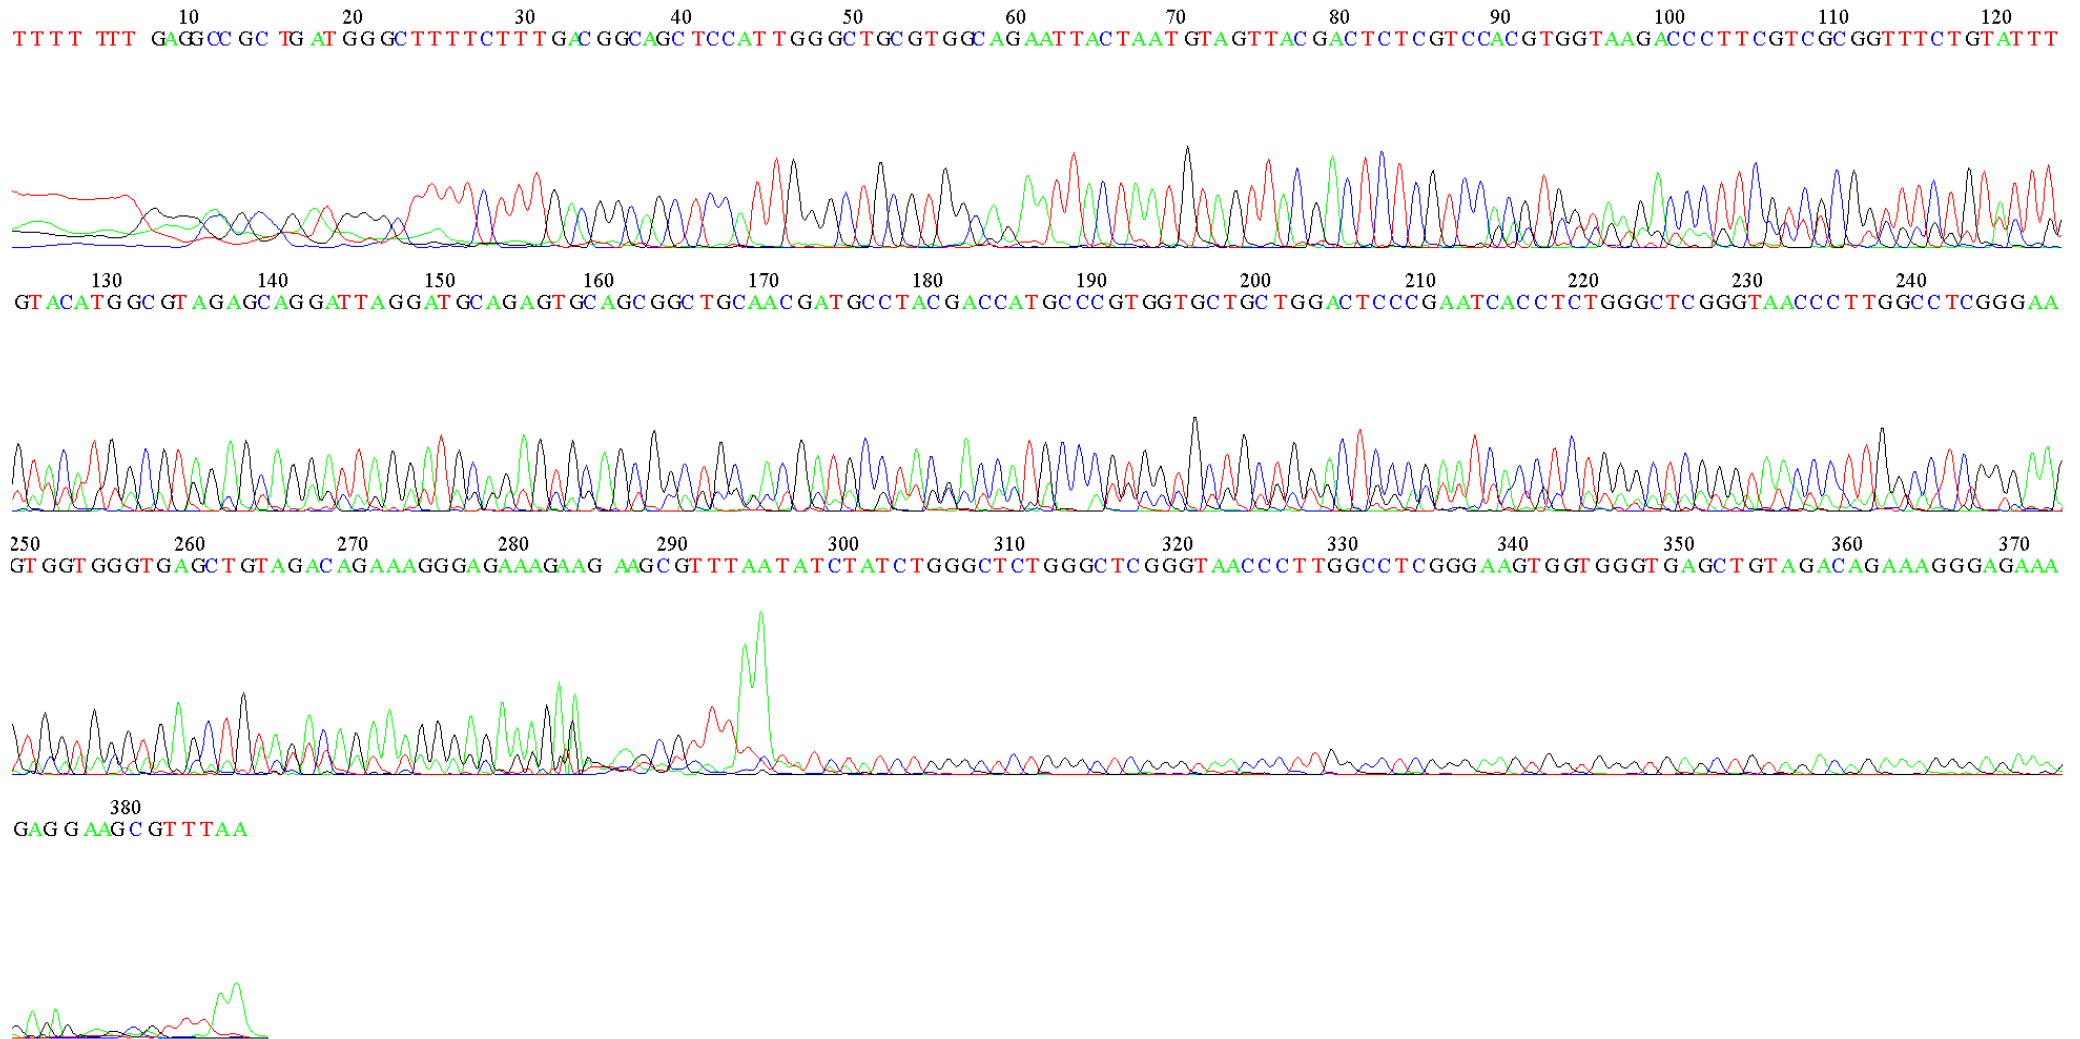

Supplement: Supplementary file 7 [file 1]

File: 3B\_TMR\_20-4R\_208.ab1 Run Ended: 2020/9/28 22:28:4 Signal G:1156 A:1611 C:3153 T:2031  
 Sample: 3B\_TMR\_20-4R\_208 Lane: 83 Base spacing: 13.262182 472 bases in 5772 scans Page 1 of 1

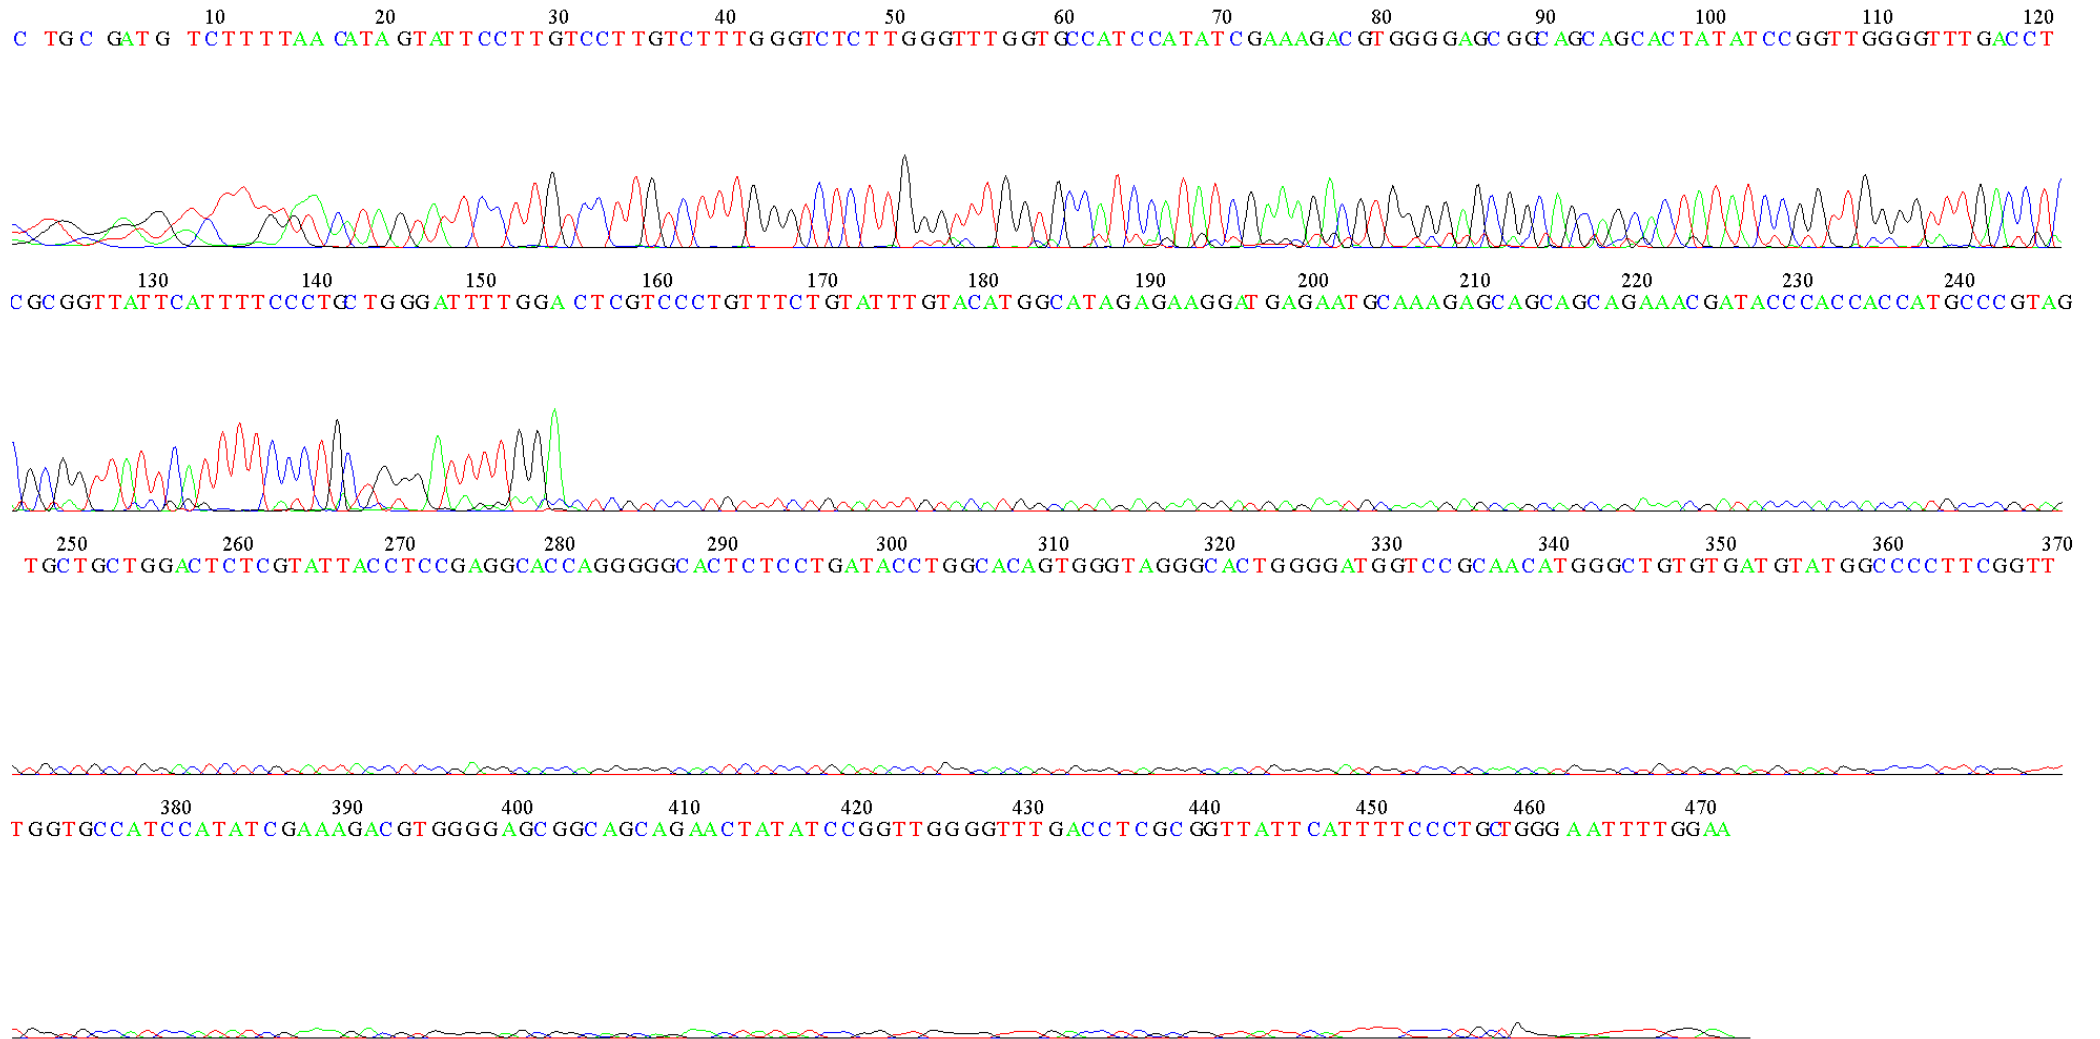

Supplement: Supplementary file 8 [file 1]

File: 2A\_Full\_41-3\_F\_219.ab1 Run Ended: 2021/7/20 23:25:31 Signal G:1633 A:3909 C:4689 T:3011  
Sample: 2A\_Full\_41-3\_F\_219 Lane: 20 Base spacing: 12.960205 294 bases in 3693 scans Page 1 of 1

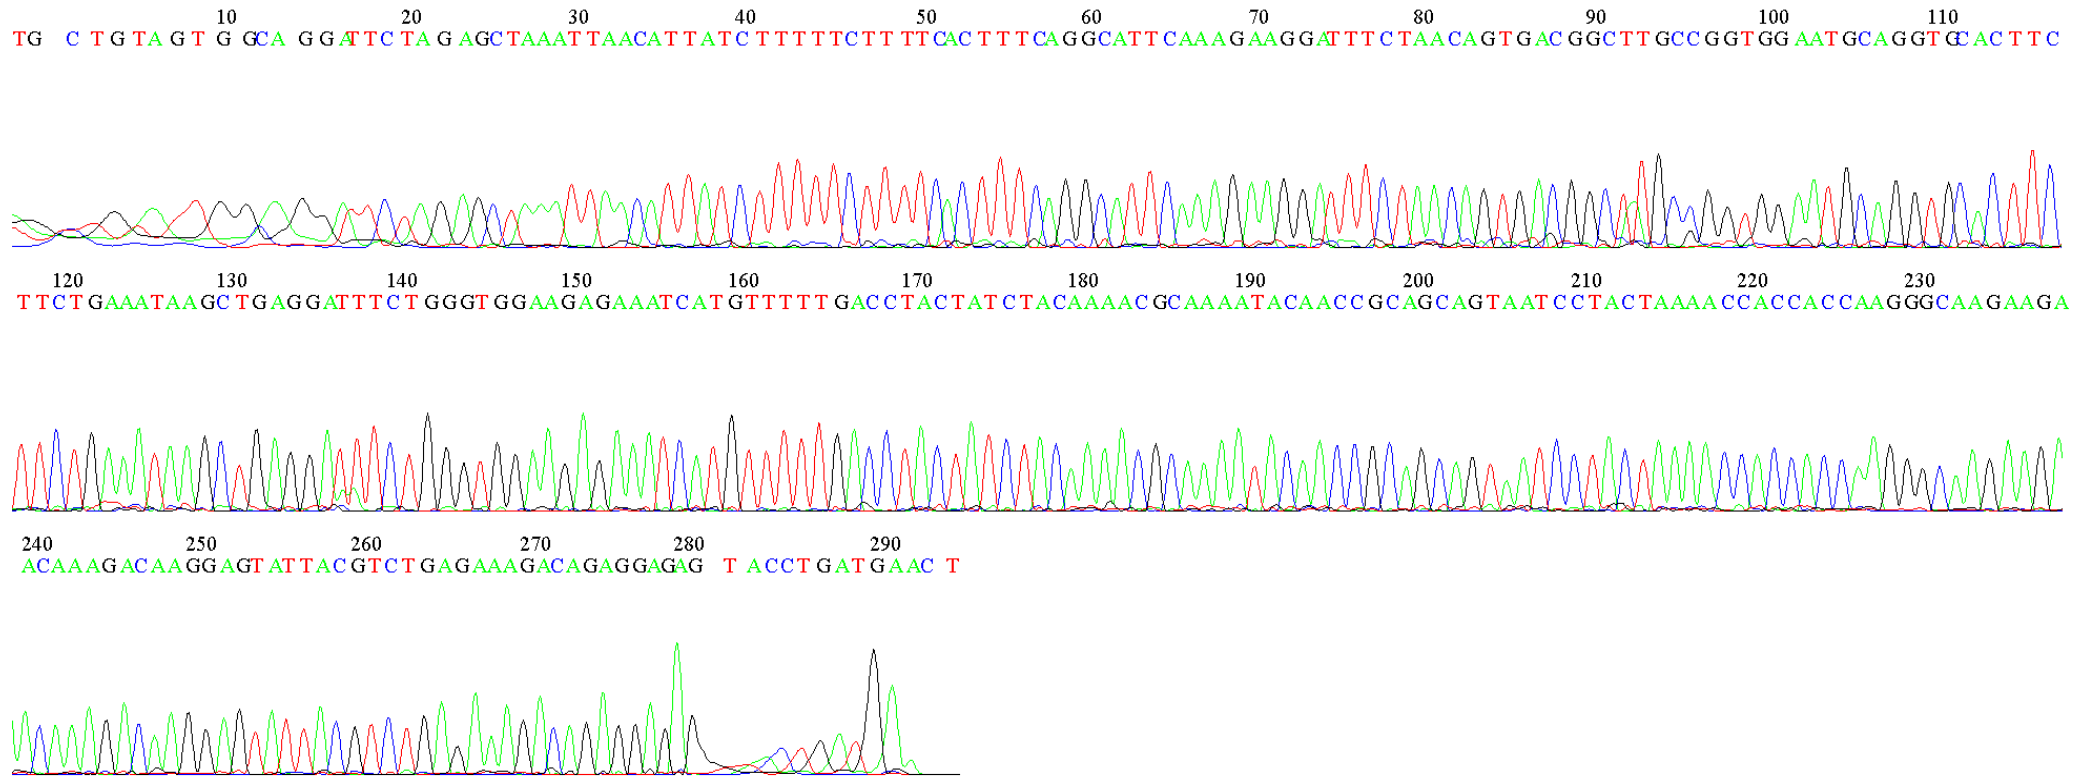

Supplement: Supplementary file 9 [file 1]

File: 1A\_TMR\_F8\_2F\_179.ab1 Run Ended: 2021/4/20 21:59:28 Signal G:4042 A:8370 C:12408 T:4618  
 Sample: 1A\_TMR\_F8\_2F\_179 Lane: 89 Base spacing: 12.951091 170 bases in 2178 scans Page 1 of 1

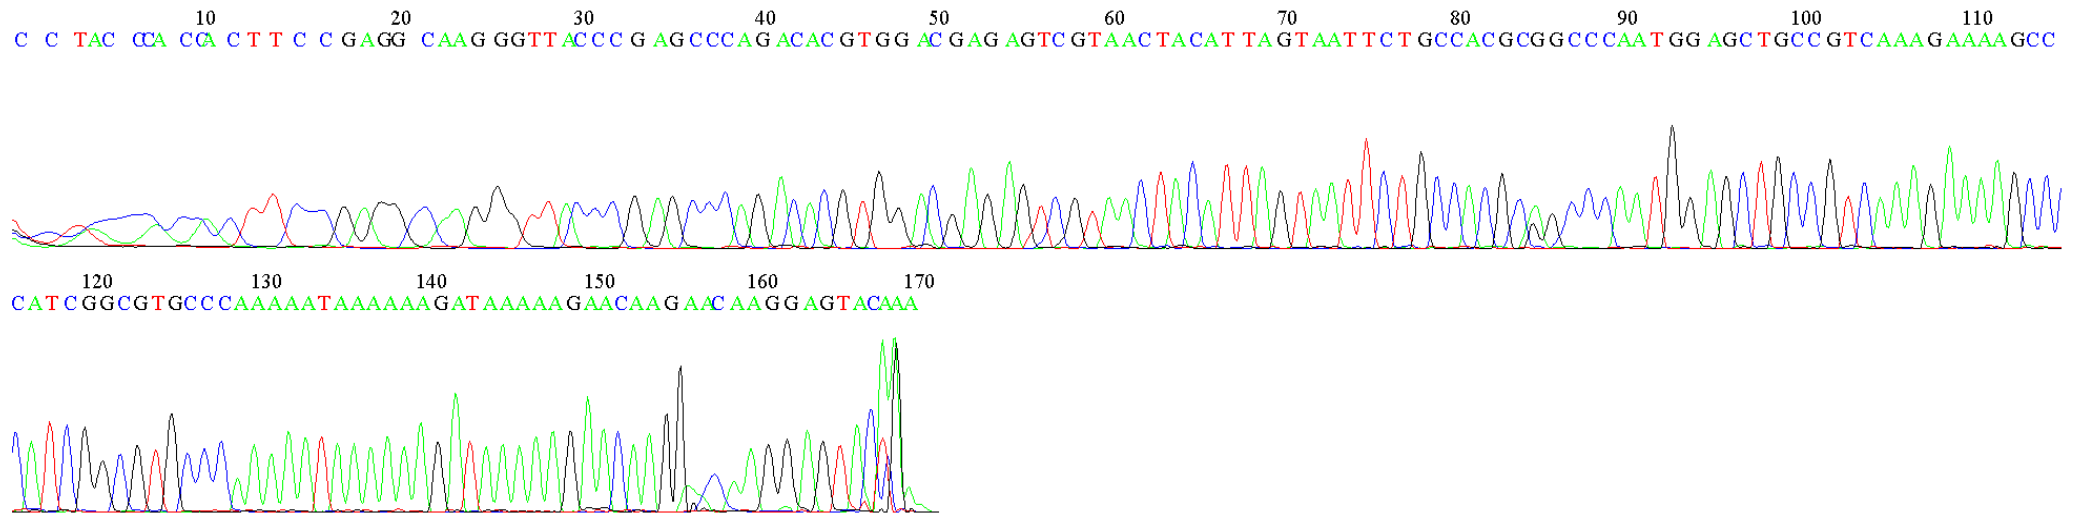

Supplement: Supplementary file 11 [file 1]

File: 20-4Reverse\_180.ab1 Run Ended: 2020/8/7 2:32:51 Signal G:3727 A:5399 C:9272 T:5126  
 Sample: 20-4Reverse\_180 Lane: 39 Base spacing: 12.534271 309 bases in 3721 scans Page 1 of 1

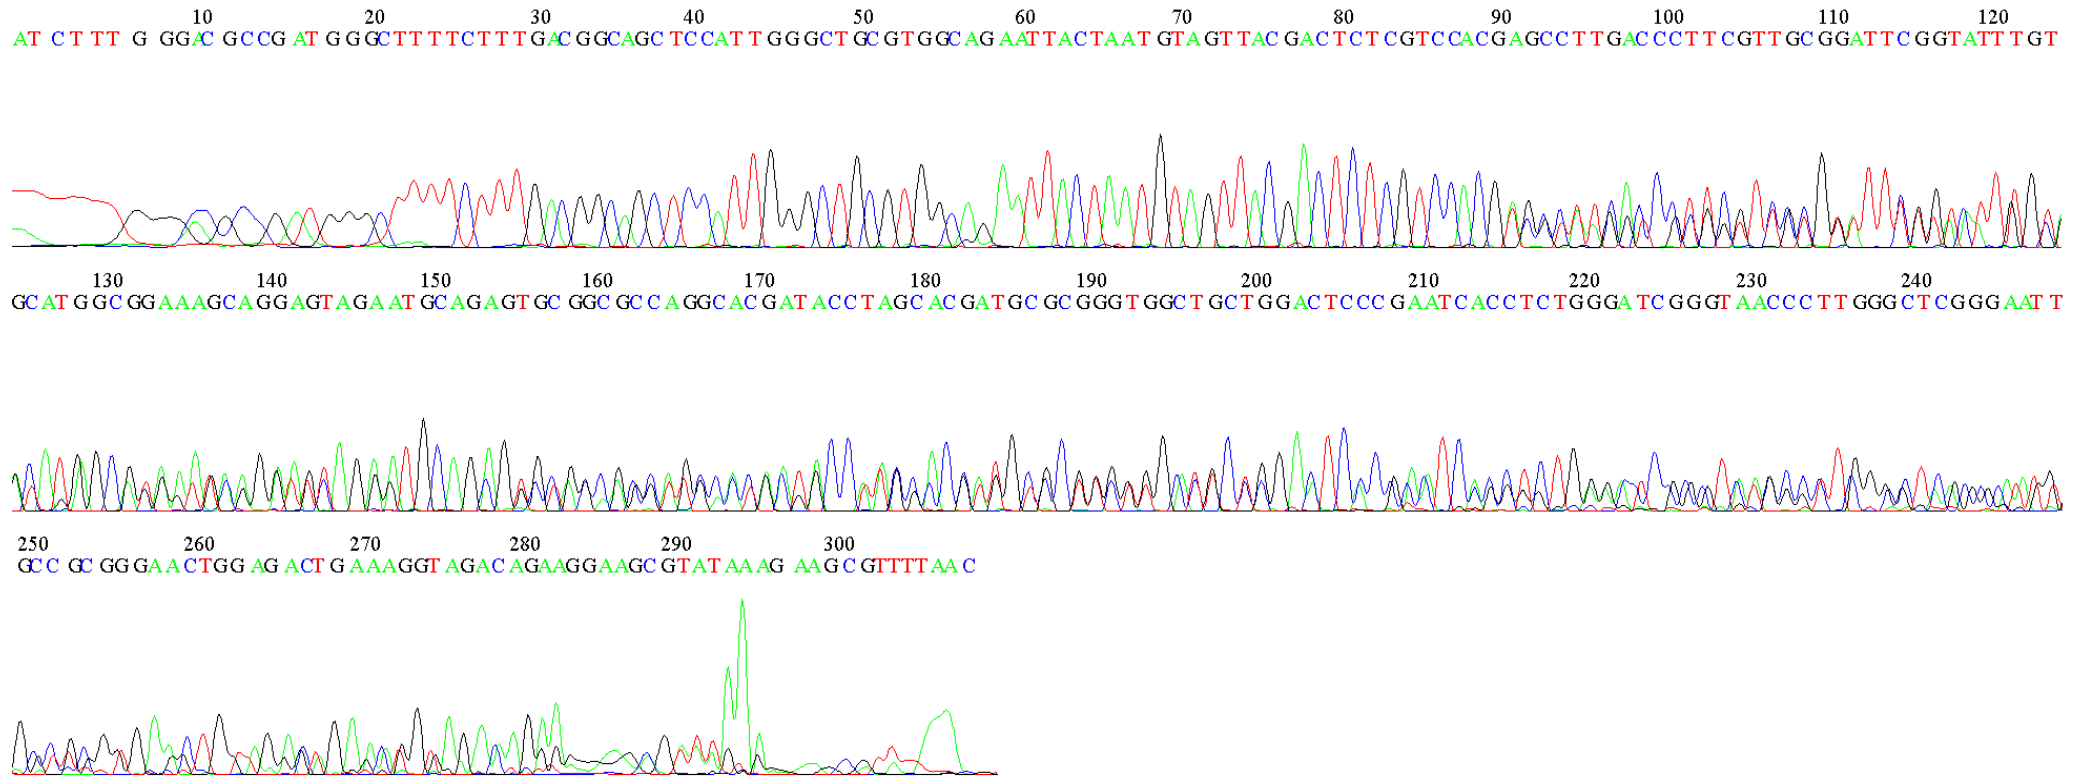

Supplement: Supplementary file 12 [file 1]

File: 1A\_TMR\_F8\_2R\_180.ab1 Run Ended: 2021/4/20 21:59:28 Signal G:6456 A:8134 C:13786 T:8889  
 Sample: 1A\_TMR\_F8\_2R\_180 Lane: 87 Base spacing: 13.33591 170 bases in 2148 scans Page 1 of 1

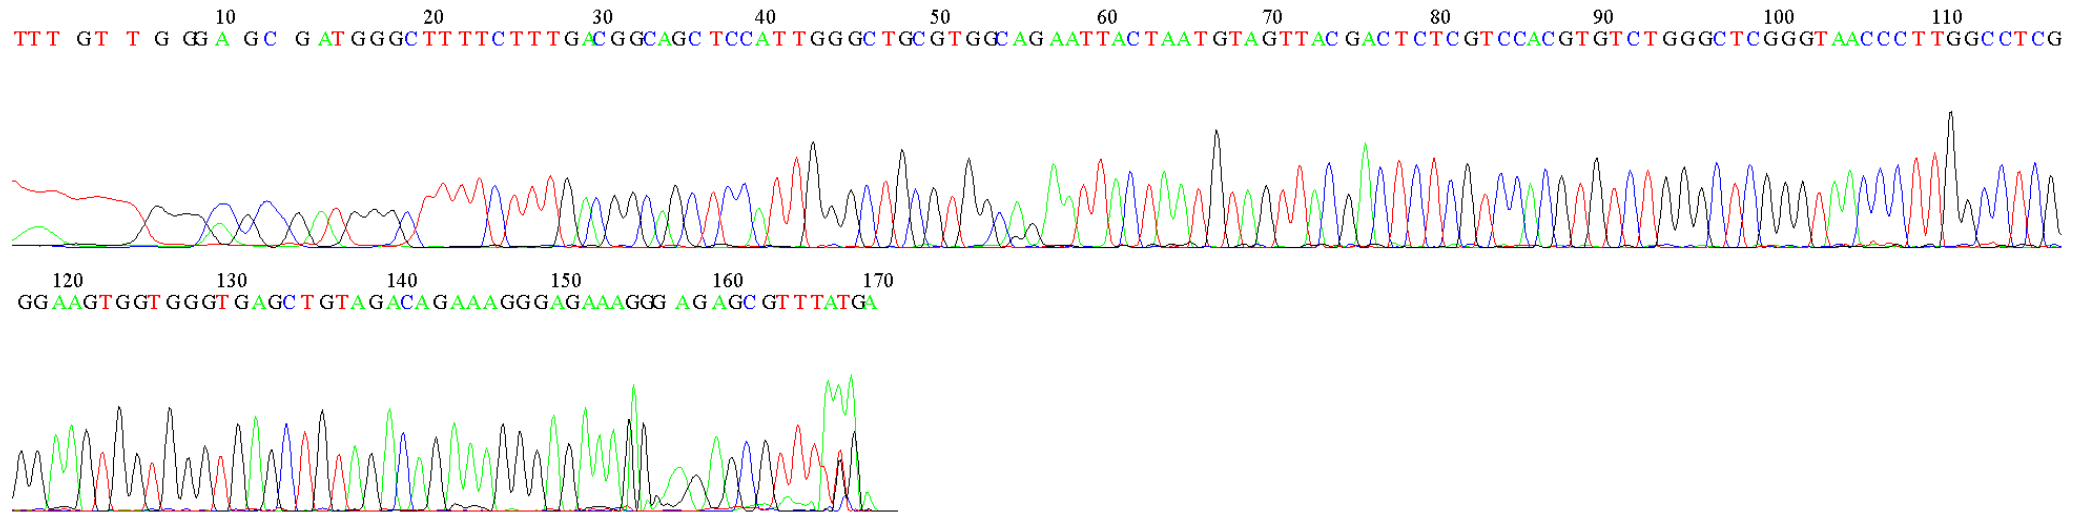

Supplement: Supplementary file 21 [file 1]

File: 39-4Reverse\_180.ab1 Run Ended: 2020/8/7 2:32:51 Signal G:3382 A:5311 C:8988 T:4751  
 Sample: 39-4Reverse\_180 Lane: 44 Base spacing: 12.565878 289 bases in 3650 scans Page 1 of 1

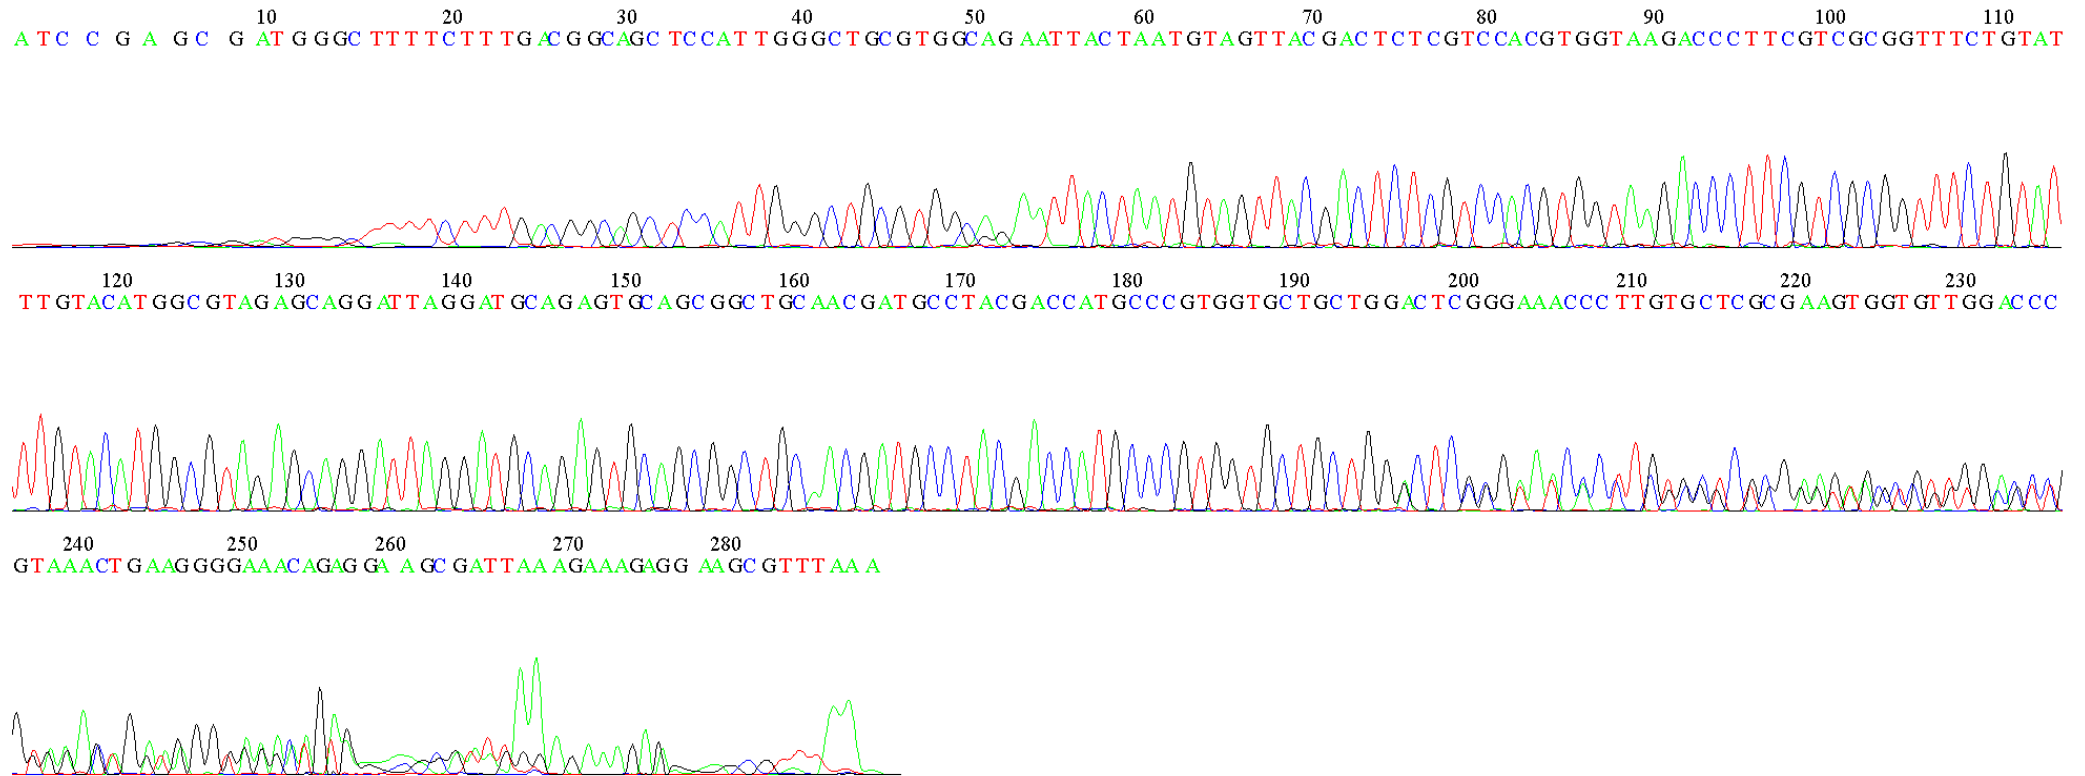

Supplement: Supplementary file 25 [file 1]

File: 1B\_TMR\_5-7F\_224.ab1 Run Ended: 2021/2/9 21:56:5 Signal G:795 A:1752 C:3269 T:1026  
 Sample: 1B\_TMR\_5-7F\_224 Lane: 56 Base spacing: 13.181665 446 bases in 5381 scans Page 1 of 1

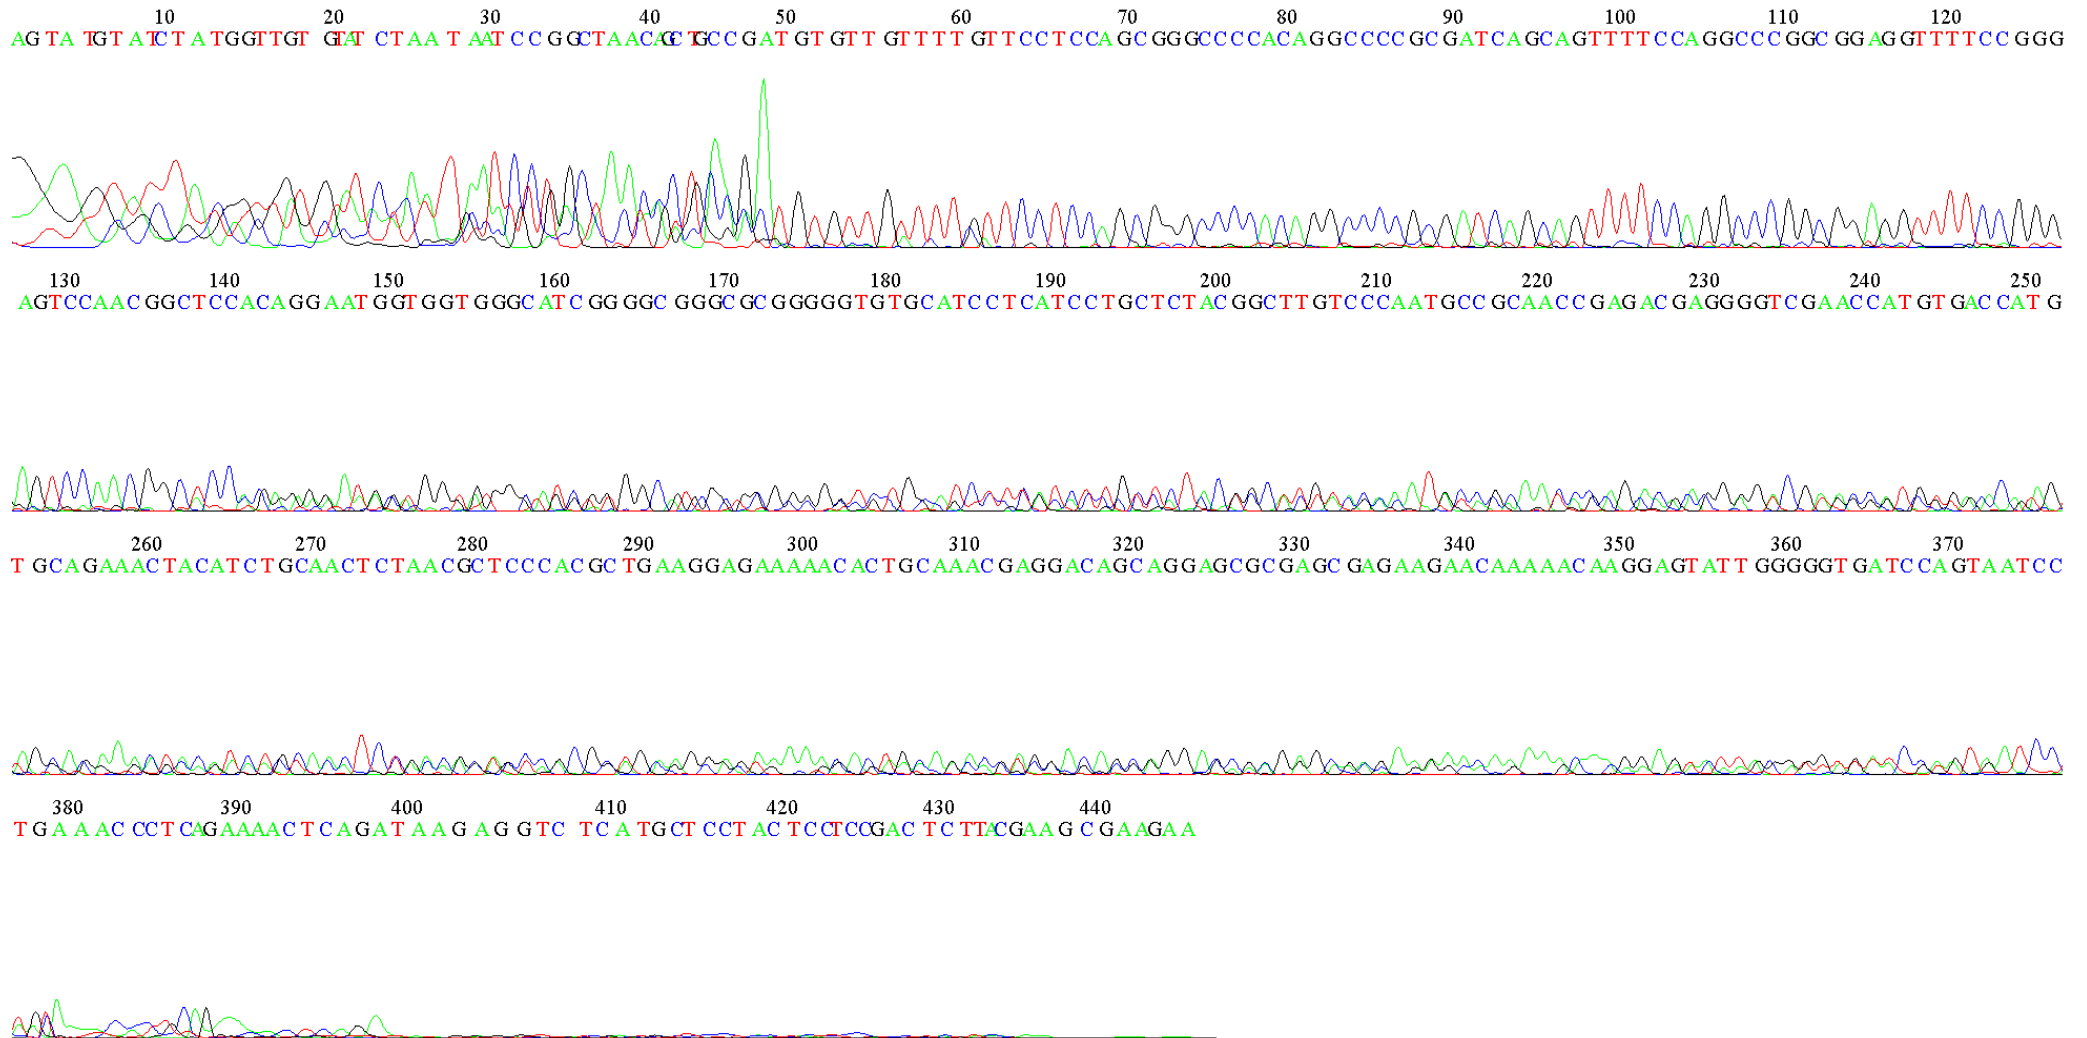

Supplement: Supplementary file 29 [file 1]

File: 2A\_TMR\_3-7R\_210.ab1 Run Ended: 2020/9/28 22:28:4 Signal G:1725 A:1686 C:4608 T:2041  
 Sample: 2A\_TMR\_3-7R\_210 Lane: 96 Base spacing: 13.369642 492 bases in 5980 scans Page 1 of 1

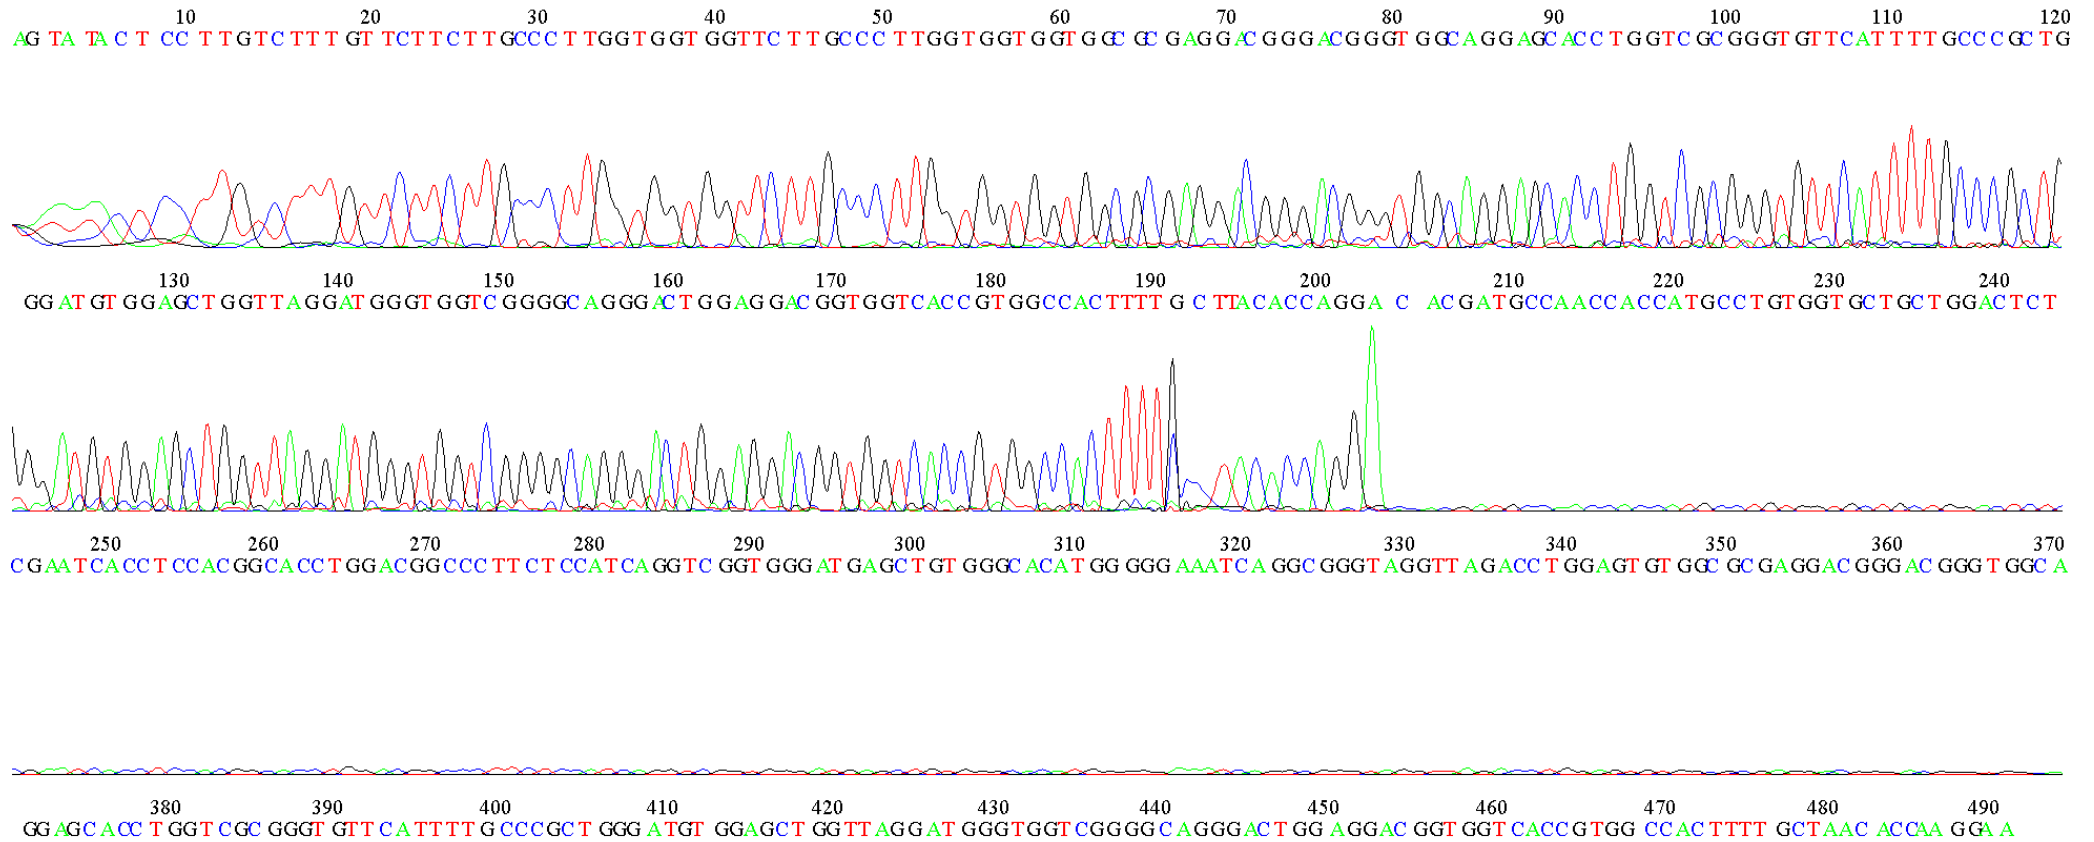

Supplement: Supplementary file 32 [file 1]

File: 2A\_TMR\_F3\_8R\_210.ab1 Run Ended: 2021/2/9 21:56:5 Signal G:1346 A:1549 C:3982 T:1544  
 Sample: 2A\_TMR\_F3\_8R\_210 Lane: 66 Base spacing: 13.609285 222 bases in 2768 scans Page 1 of 1

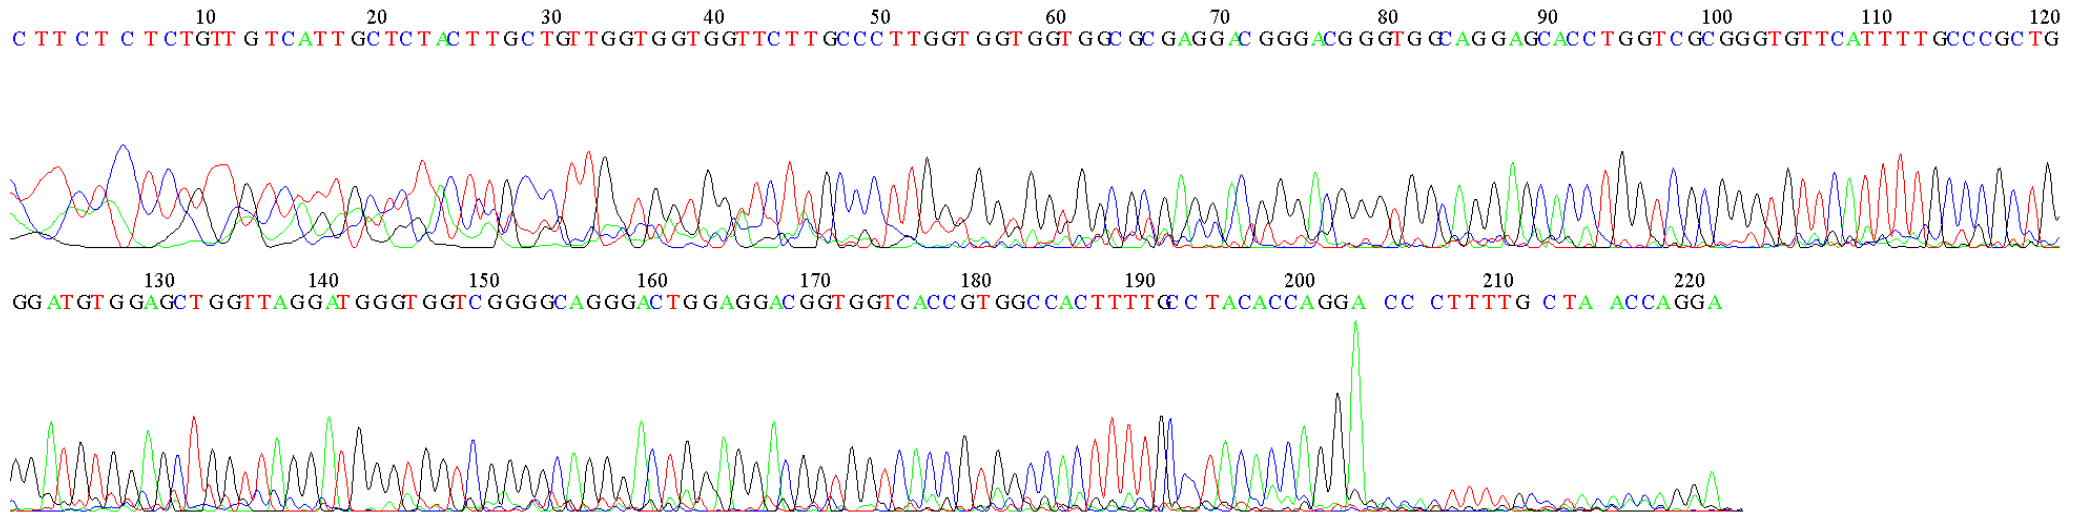

Supplement: Supplementary file 33 [file 1]

File: 23-2Reverse\_180.ab1 Run Ended: 2020/8/7 2:32:51 Signal G:4594 A:6471 C:11970 T:6129  
 Sample: WTReverse\_180 Lane: 59 Base spacing: 12.629766 296 bases in 3675 scans Page 1 of 1

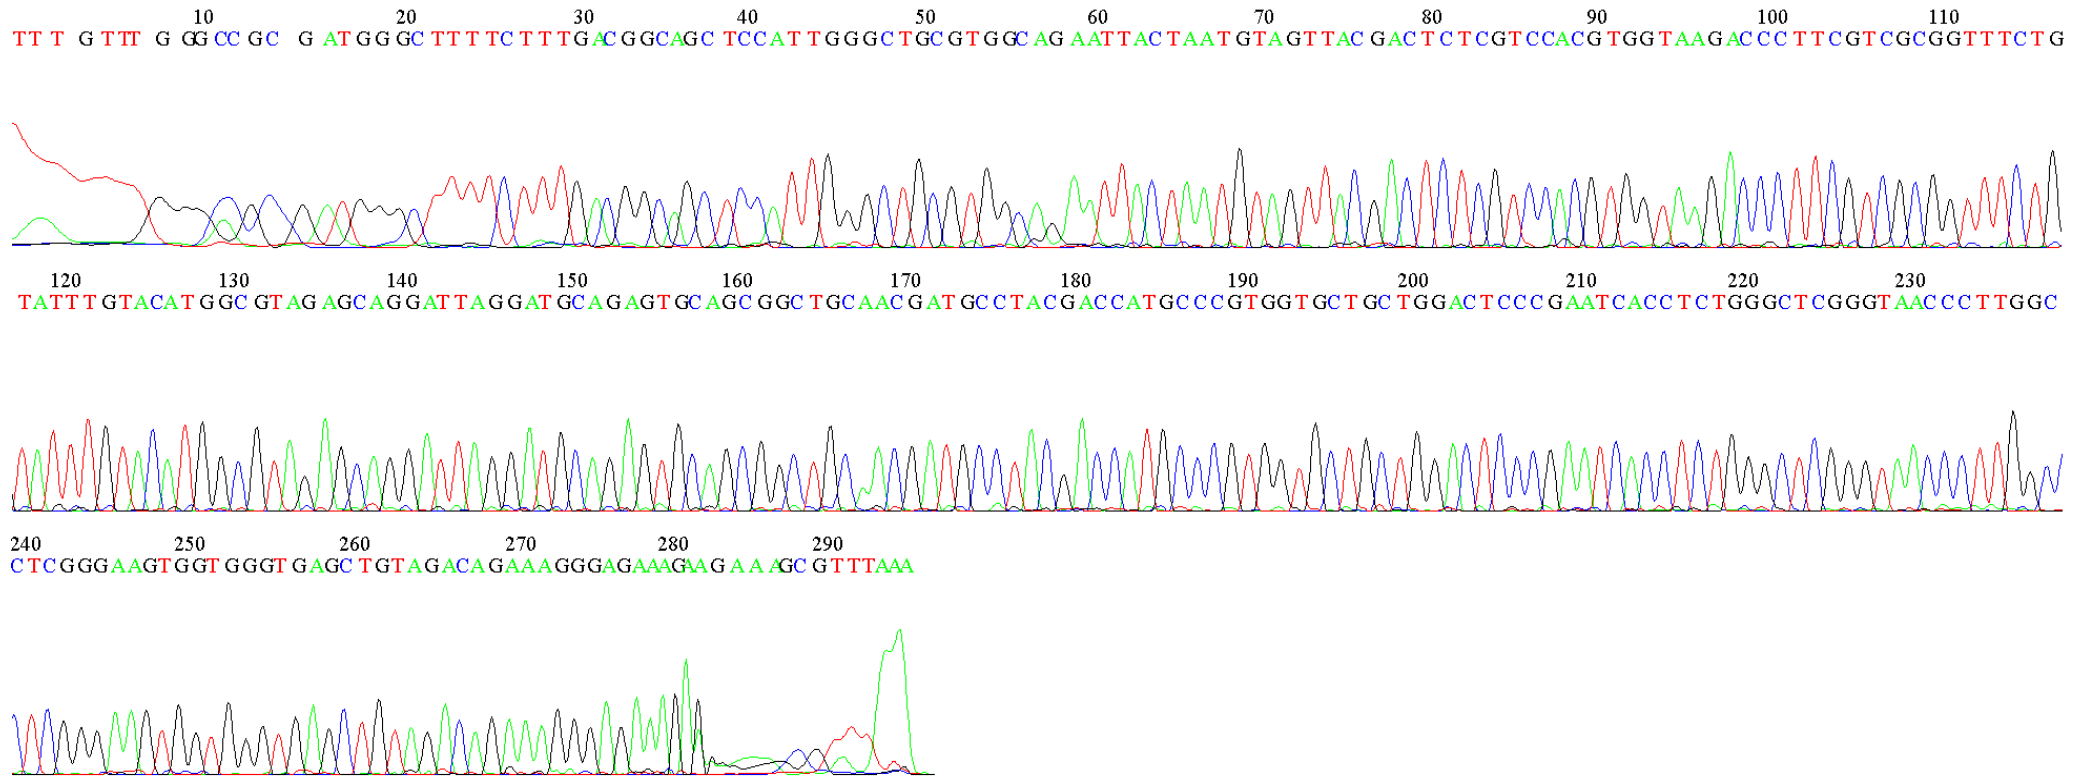

Supplement: Supplementary file 35 [file 1]

File: 3A\_TMR\_F16\_2R\_206.ab1 Run Ended: 2021/4/20 21:59:28 Signal G:686 A:768 C:1440 T:912  
Sample: 3A\_TMR\_F16\_2R\_206 Lane: 71 Base spacing: 13.293003 540 bases in 6532 scans Page 1 of 1

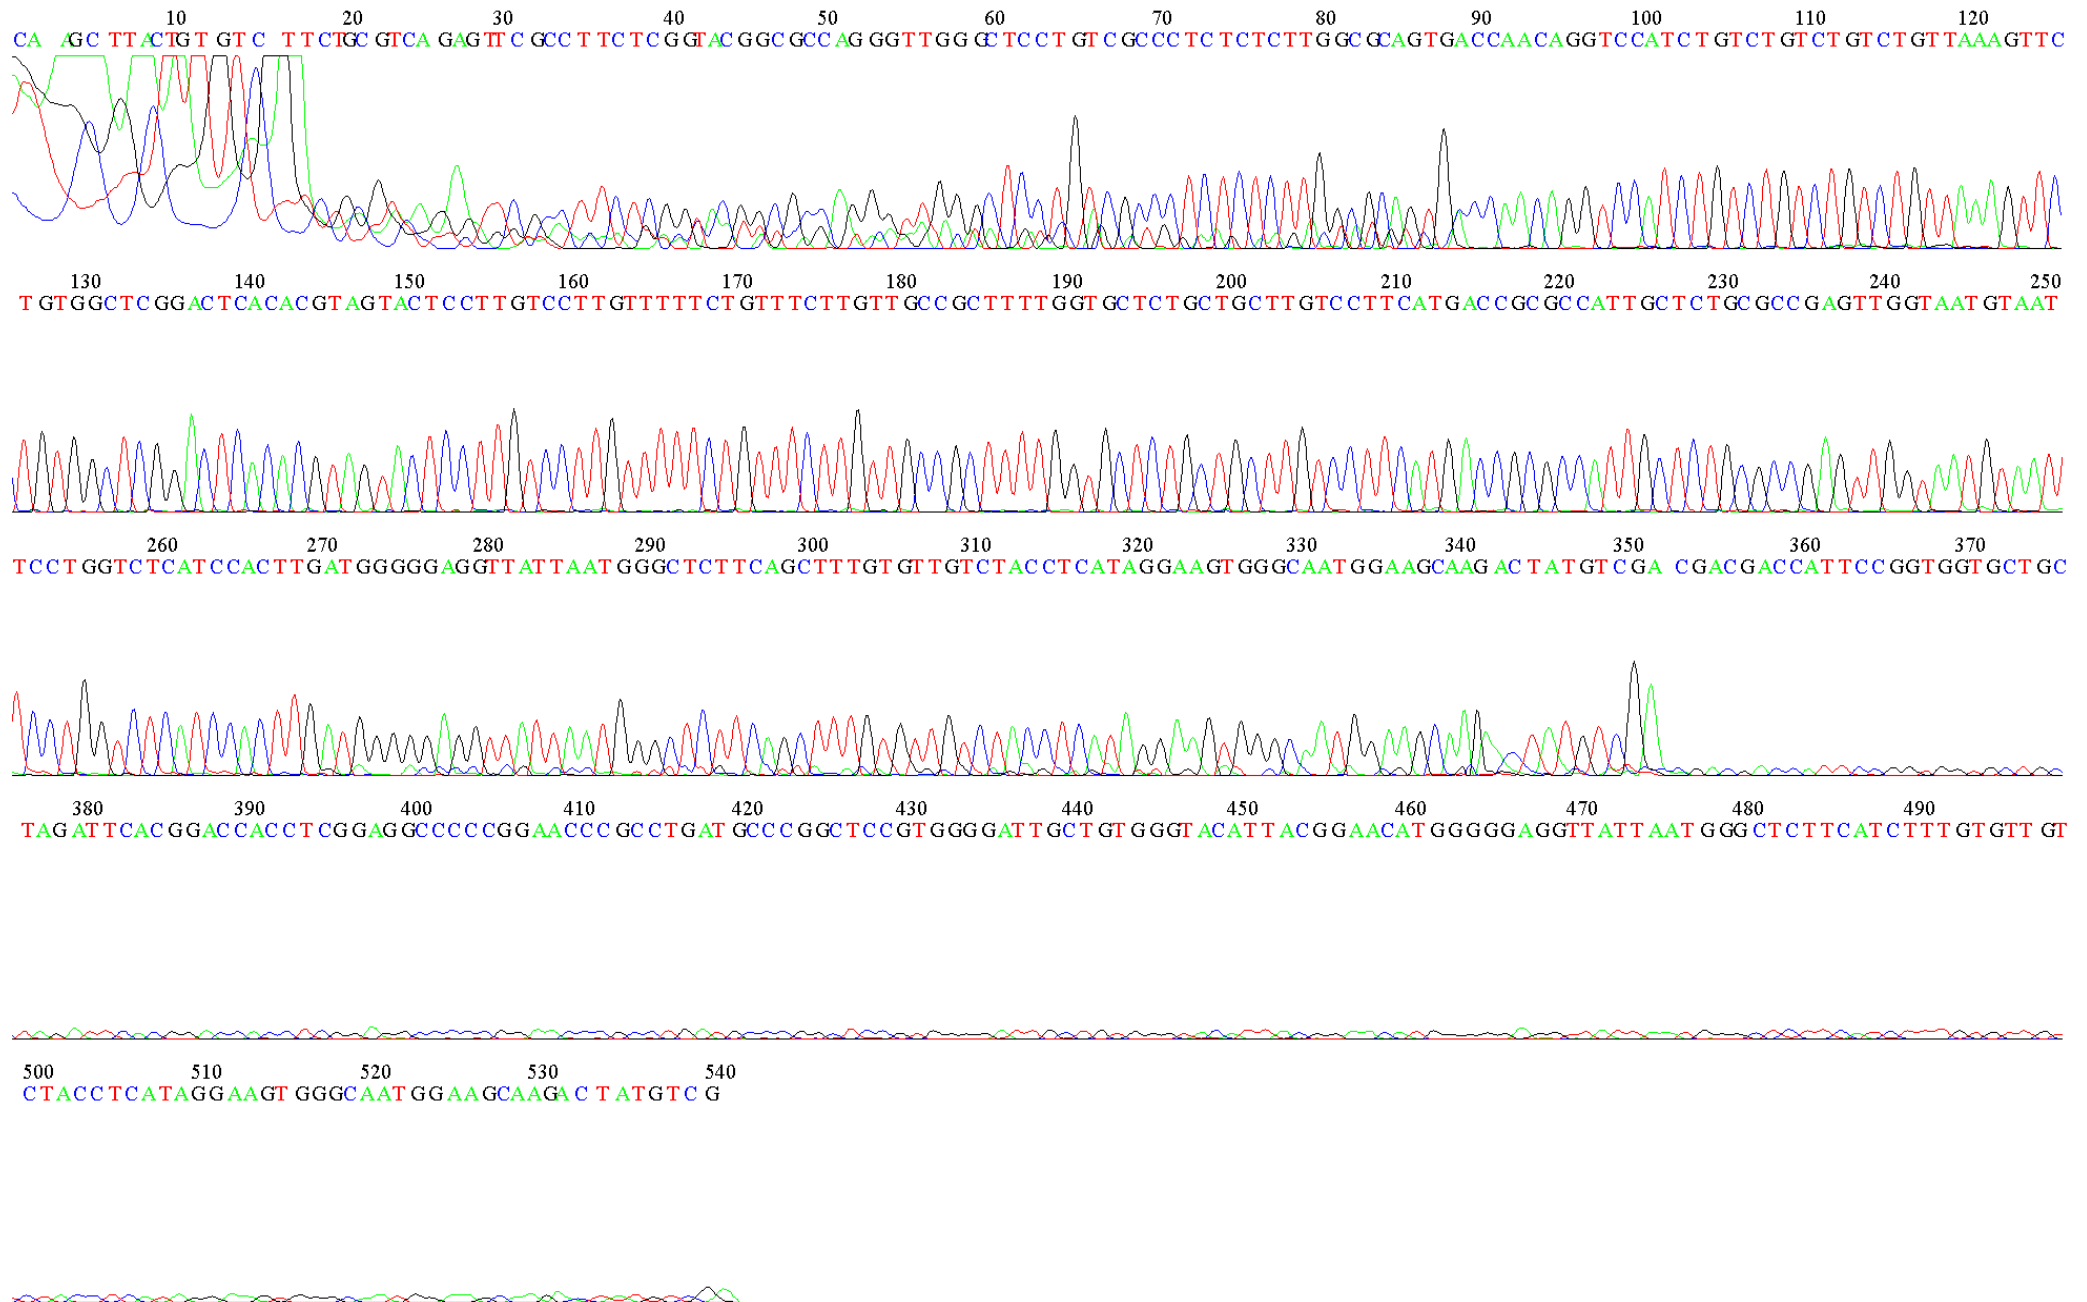

Supplement: Supplementary file 36 [file 1]

File: 1A\_Part\_F60\_5F\_226.ab1 Run Ended: 2021/4/20 21:59:28 Signal G:1255 A:2617 C:3873 T:2452  
 Sample: 1A\_Part\_F60\_5F\_226 Lane: 93 Base spacing: 13.434329 433 bases in 5265 scans Page 1 of 1

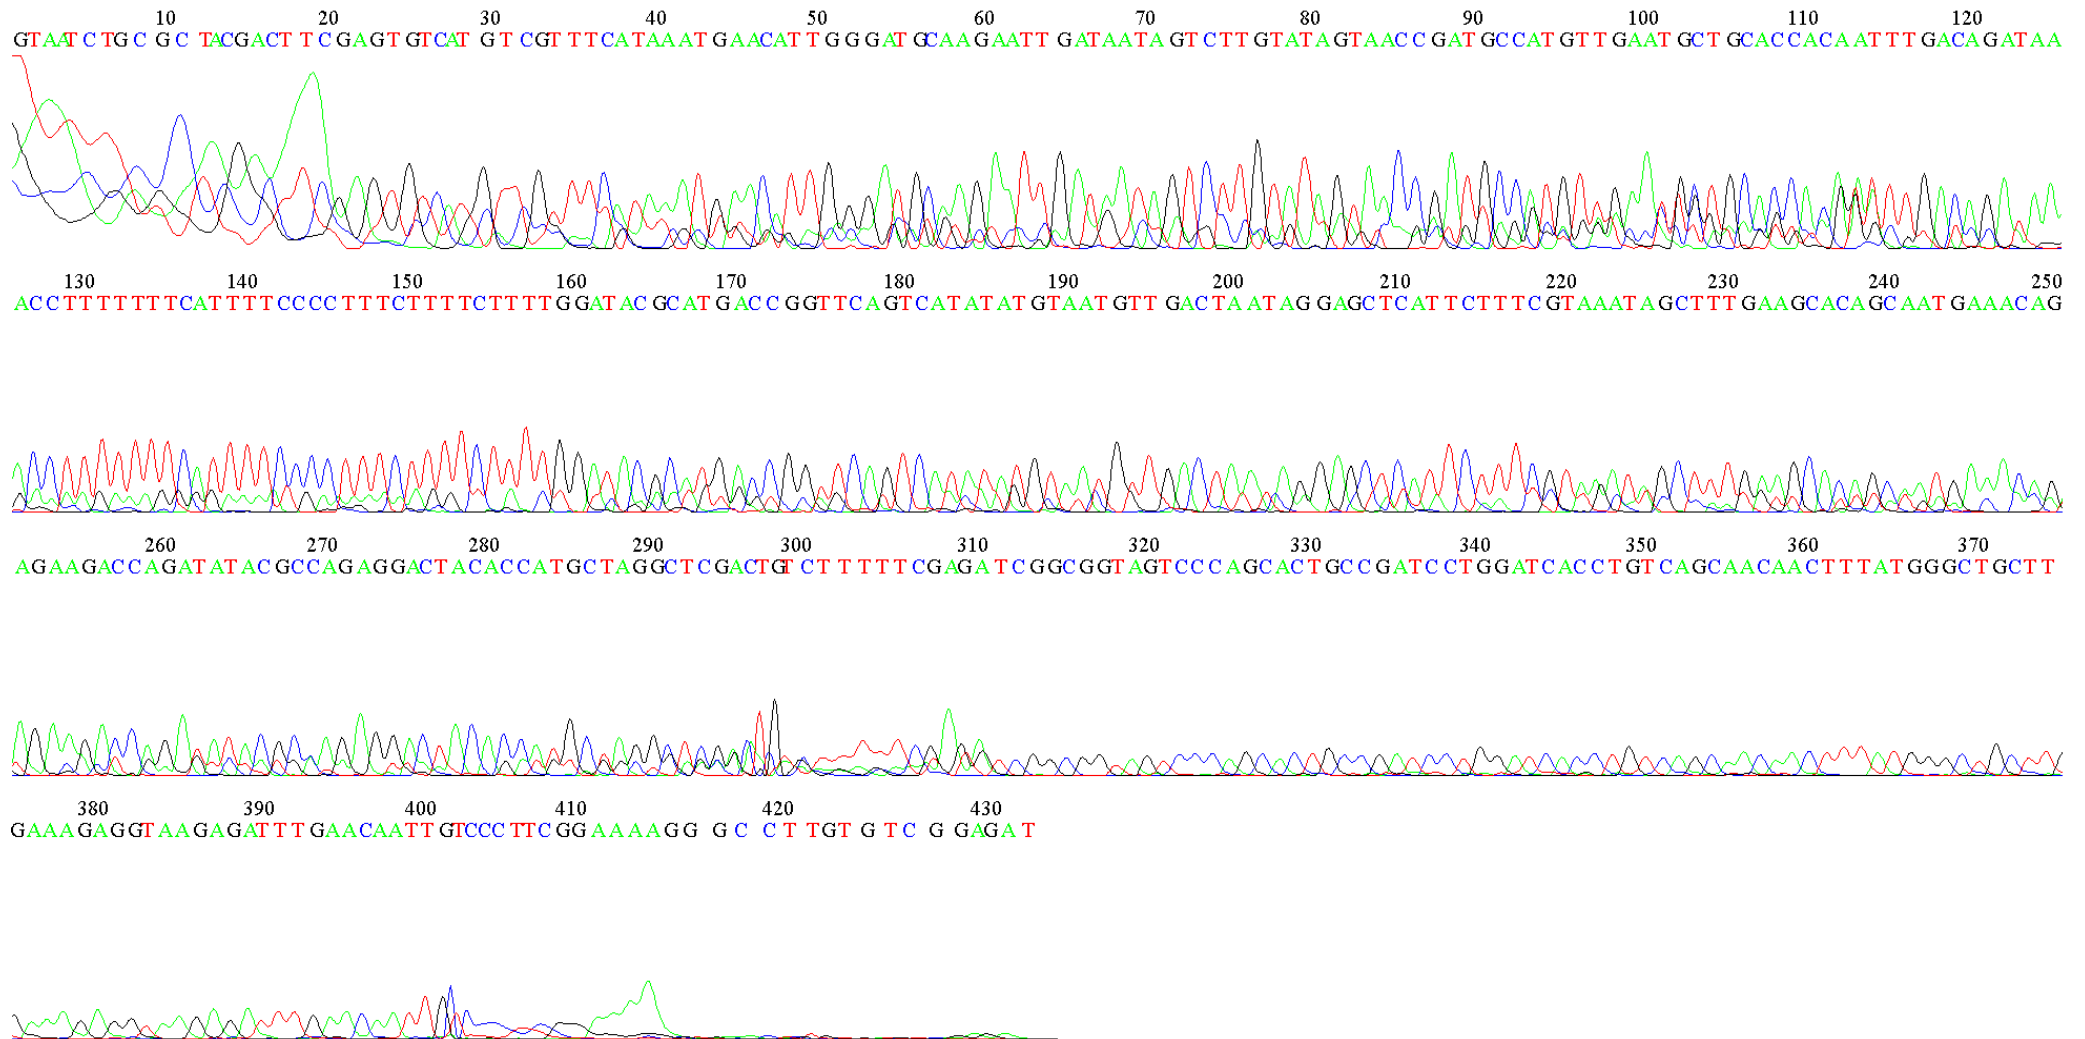

Supplement: Supplementary file 40 [file 1]

File: 2A\_Full\_41-3\_R\_210.ab1 Run Ended: 2021/7/20 23:25:31 Signal G:2673 A:4639 C:5757 T:4564  
 Sample: 2A\_Full\_41-3\_R\_210 Lane: 18 Base spacing: 13.140968 295 bases in 3653 scans Page 1 of 1

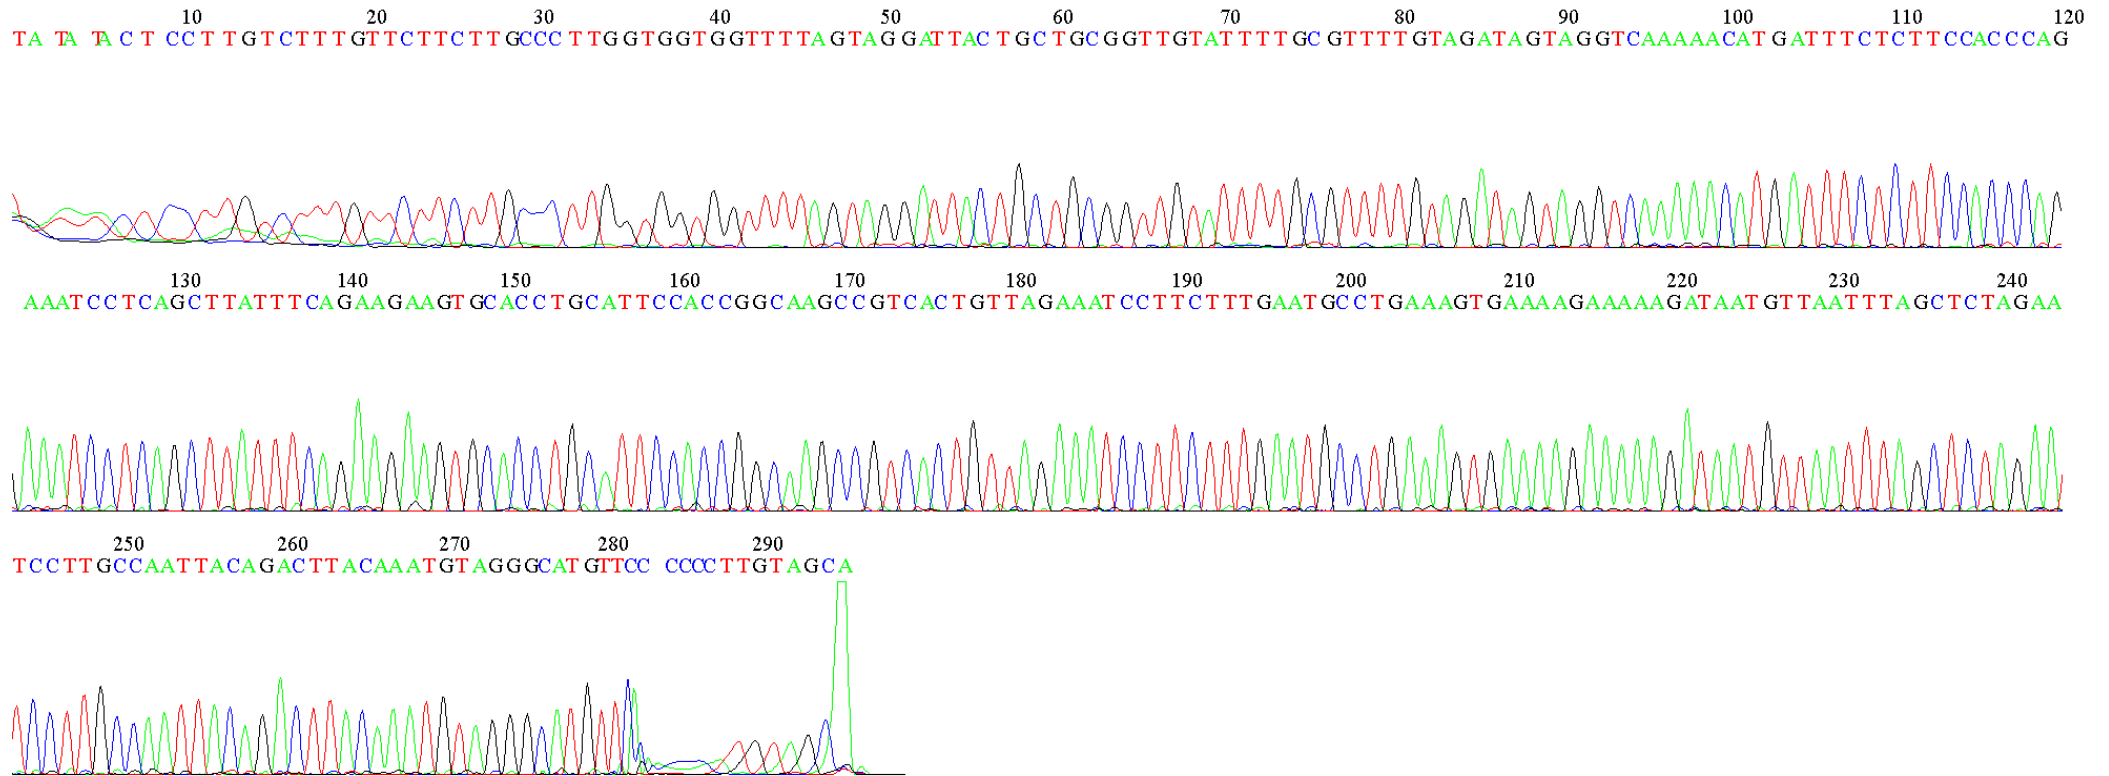

Supplement: Supplementary file 42 [file 1]

File: 1A\_TMR\_8-6R\_180.ab1 Run Ended: 2020/11/24 21:54:13 Signal G:1956 A:3648 C:5974 T:3495  
 Sample: 1A\_TMR\_8-6R\_180 Lane: 91 Base spacing: 13.094286 295 bases in 3651 scans Page 1 of 1

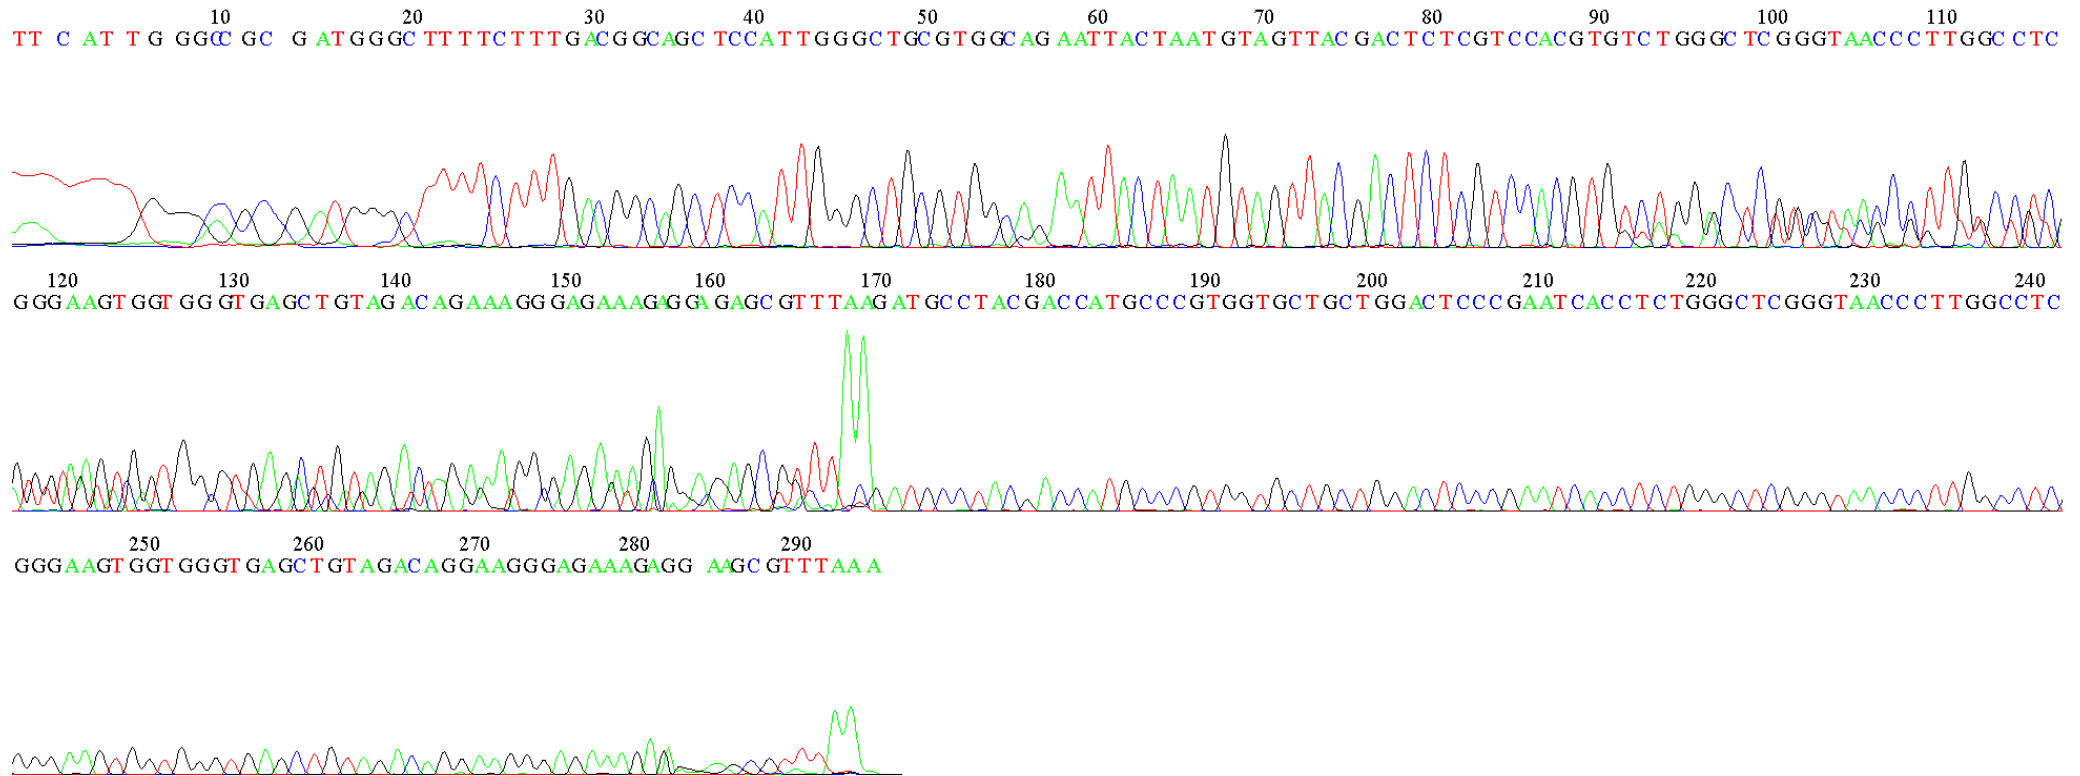

Supplement: Supplementary file 46 [file 1]

File: 3B\_TMR\_20-4F\_207.ab1 Run Ended: 2020/9/28 22:28:4 Signal G:716 A:1943 C:2429 T:927  
Sample: 3B\_TMR\_20-4F\_207 Lane: 85 Base spacing: 13.198108 473 bases in 5741 scans Page 1 of 1

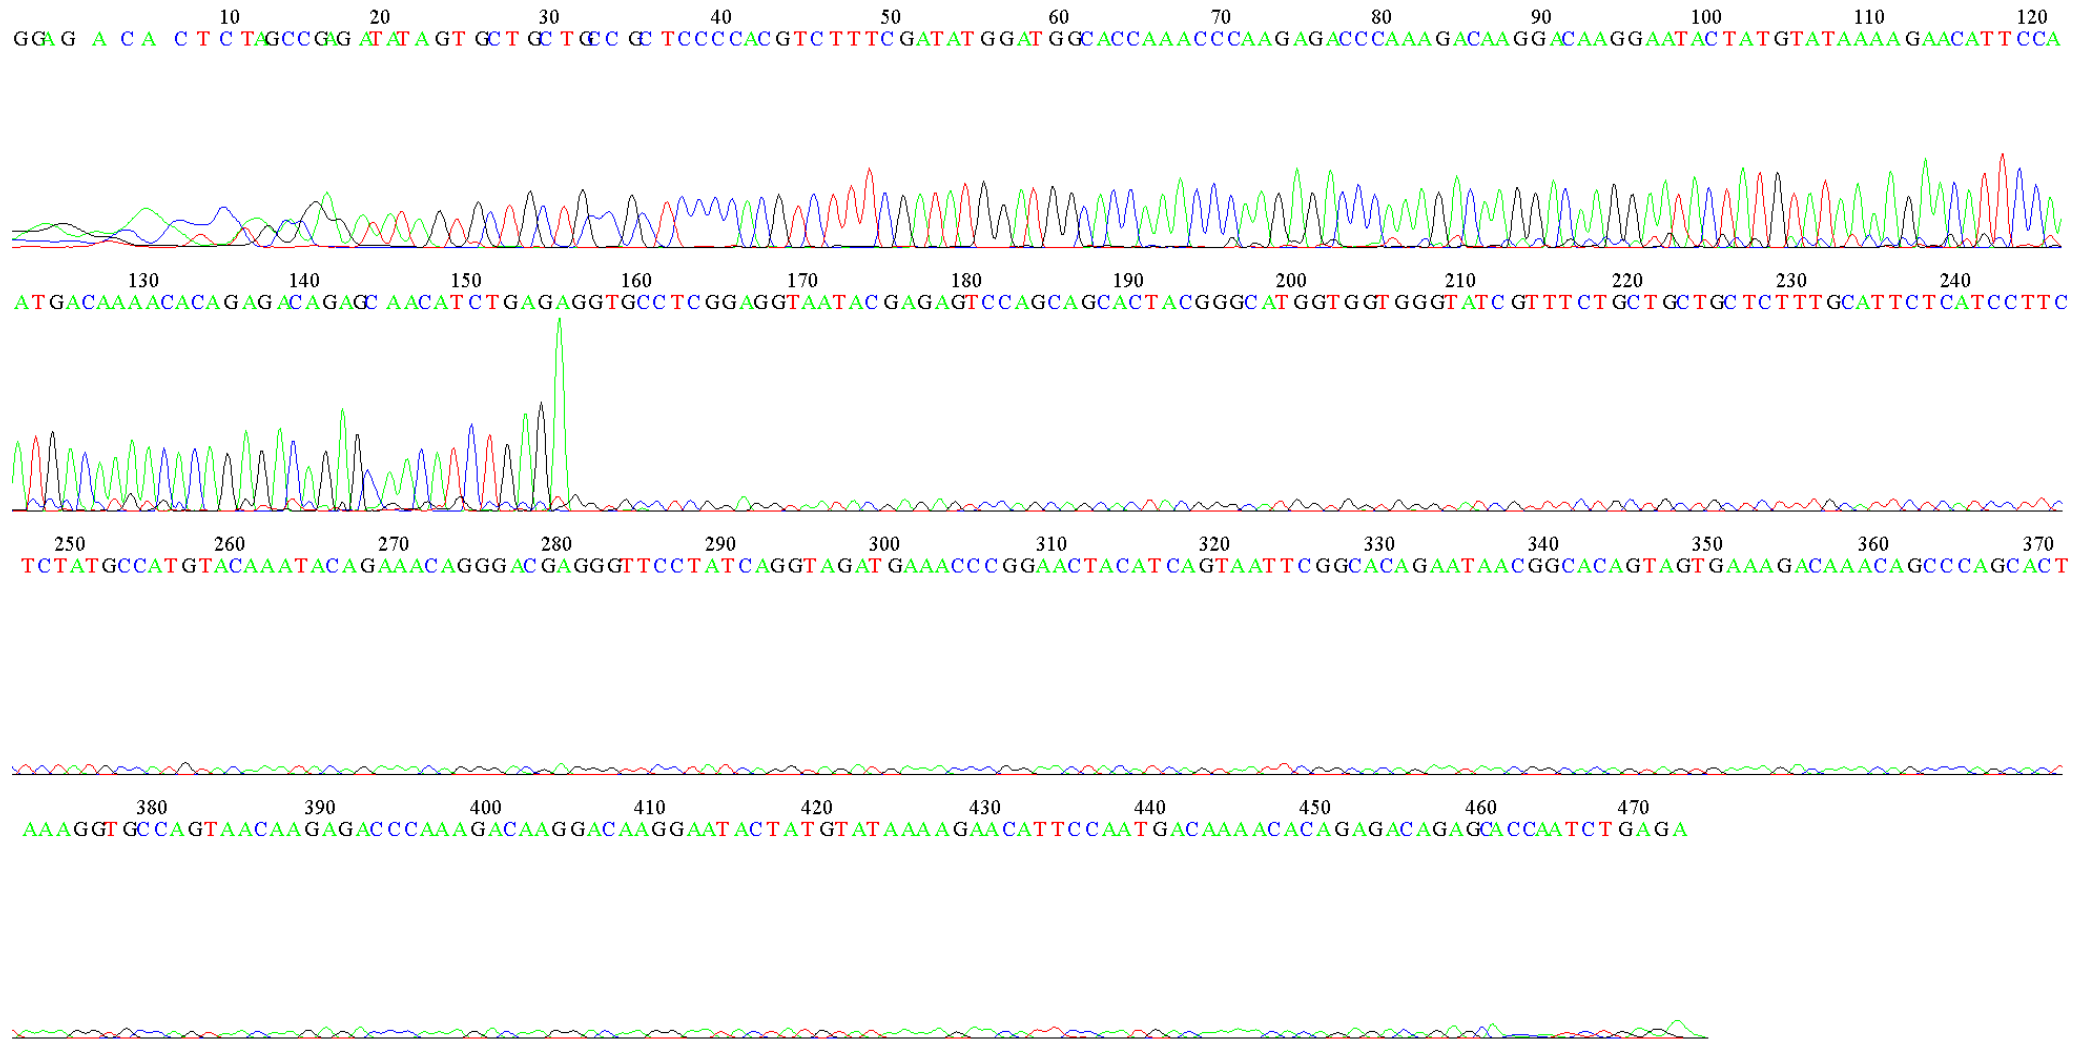

Supplement: Supplementary file 50 [file 1]

File: 32-3Reverse\_180.ab1 Run Ended: 2020/8/7 2:32:51 Signal G:3032 A:4784 C:7576 T:4021  
 Sample: 32-3Reverse\_180 Lane: 36 Base spacing: 12.73107 290 bases in 3595 scans Page 1 of 1

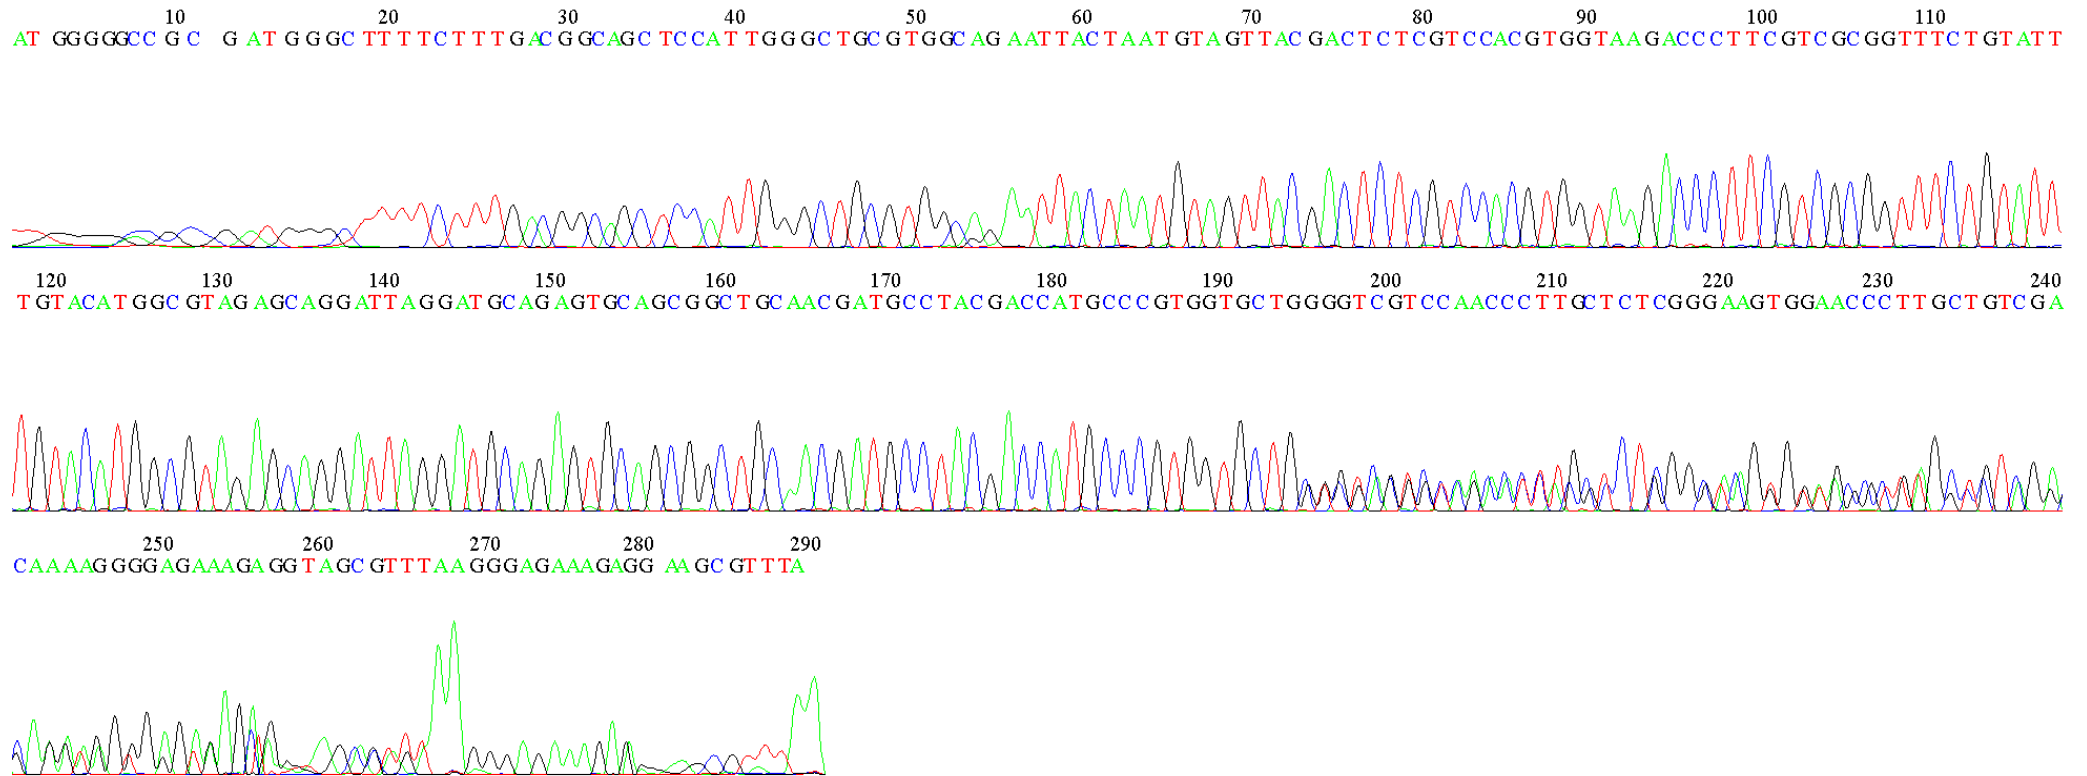

Supplement: Supplementary file 52 [file 1]

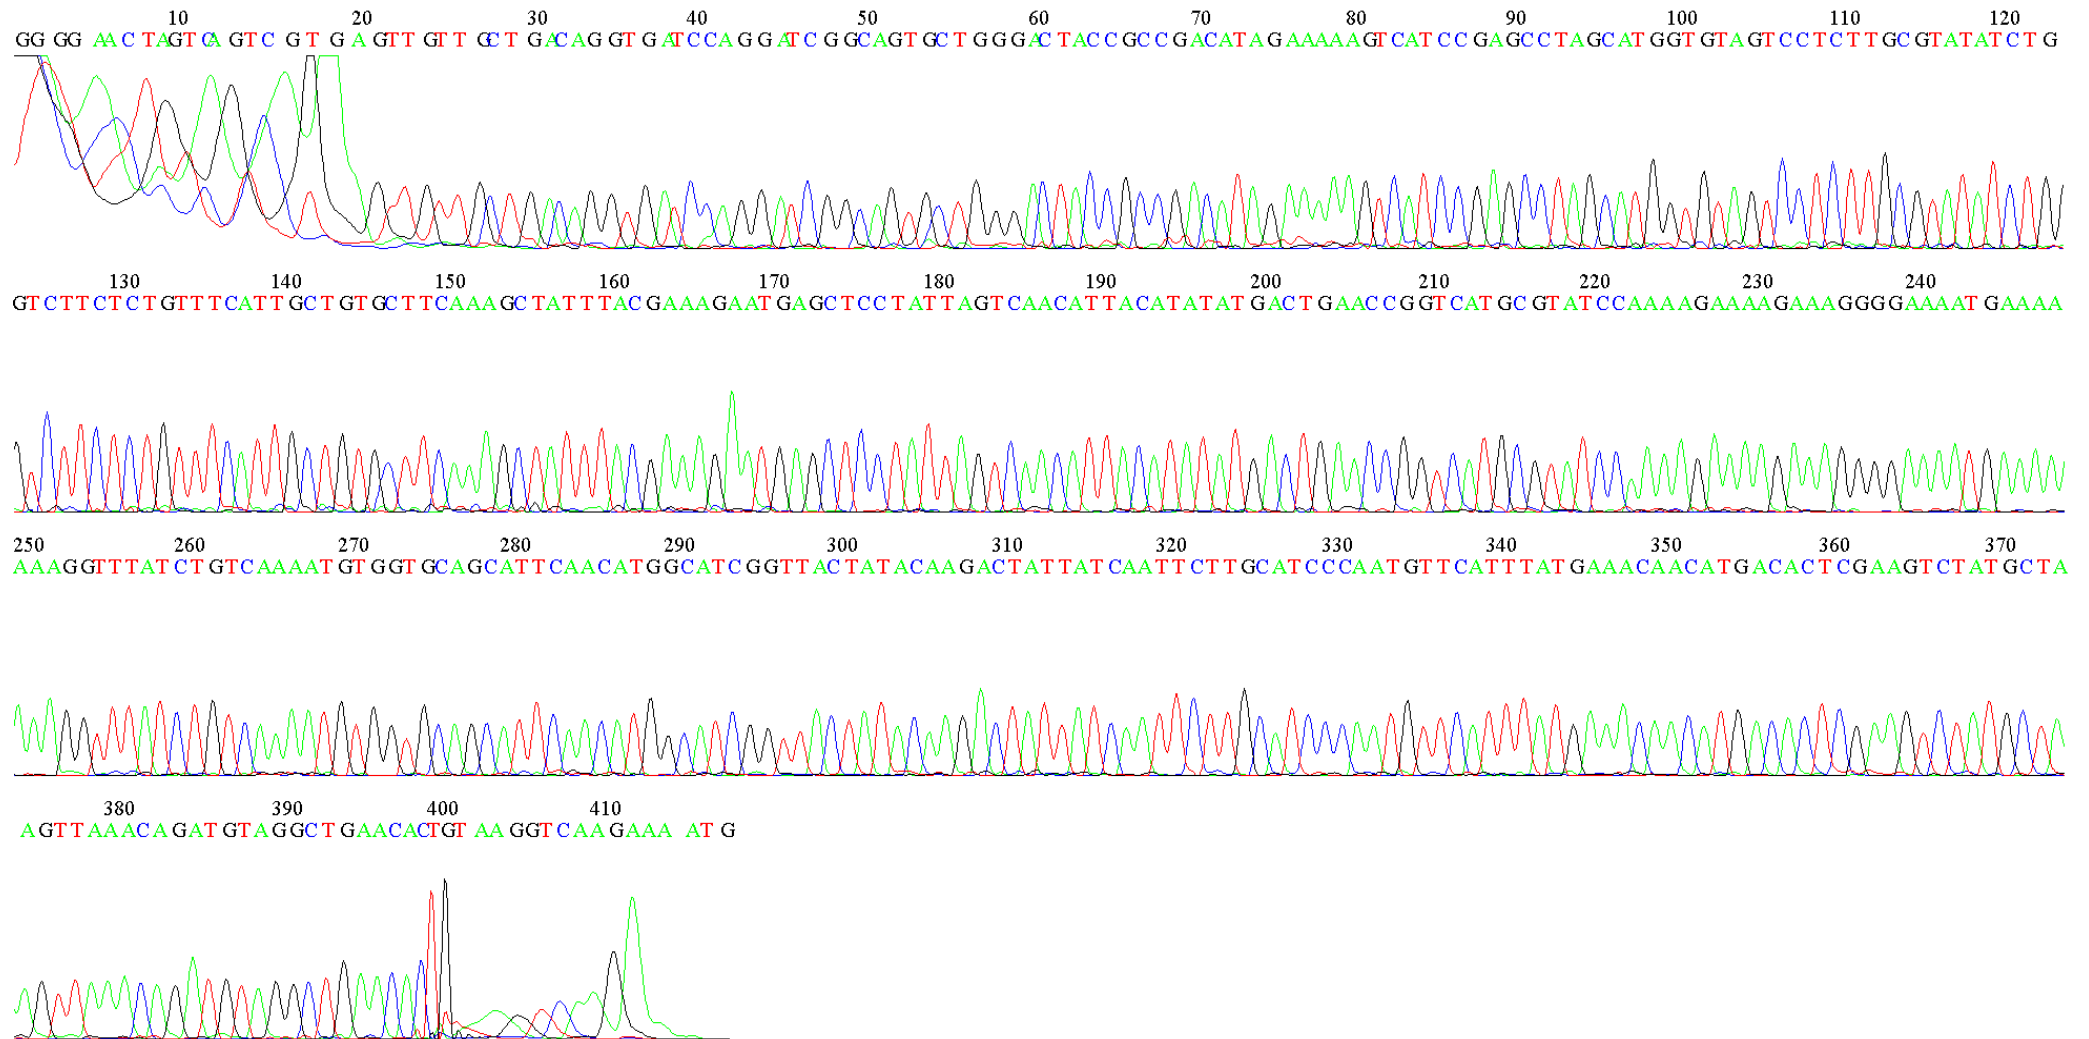

Supplement: Supplementary file 54 [file 1]

File: 1A\_Full\_32-2R\_215.ab1 Run Ended: 2020/9/28 22:28:4 Signal G:1536 A:5245 C:7016 T:3764  
Sample: 1A\_Full\_32-2R\_215 Lane: 88 Base spacing: 12.946524 280 bases in 3453 scans Page 1 of 1

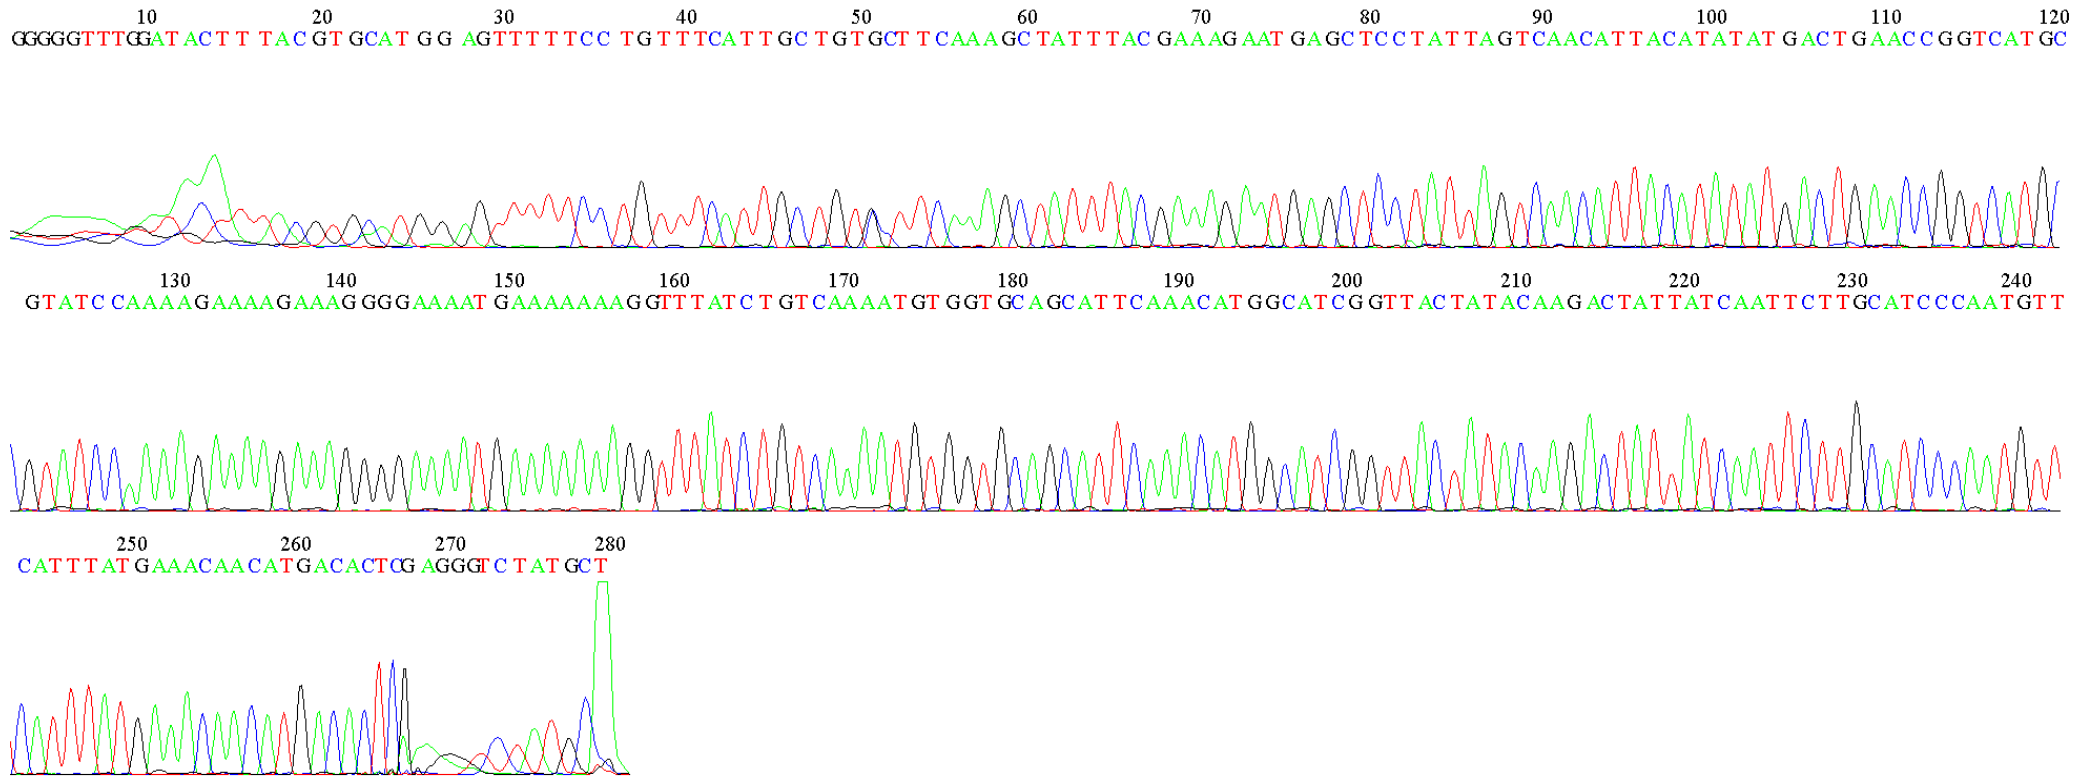

Supplement: Supplementary file 55 [file 1]

File: 23-3Reverse\_180.ab1 Run Ended: 2020/8/7 2:32:51 Signal G:2719 A:4291 C:7240 T:3690  
 Sample: 23-3Reverse\_180 Lane: 35 Base spacing: 12.657659 295 bases in 3635 scans Page 1 of 1

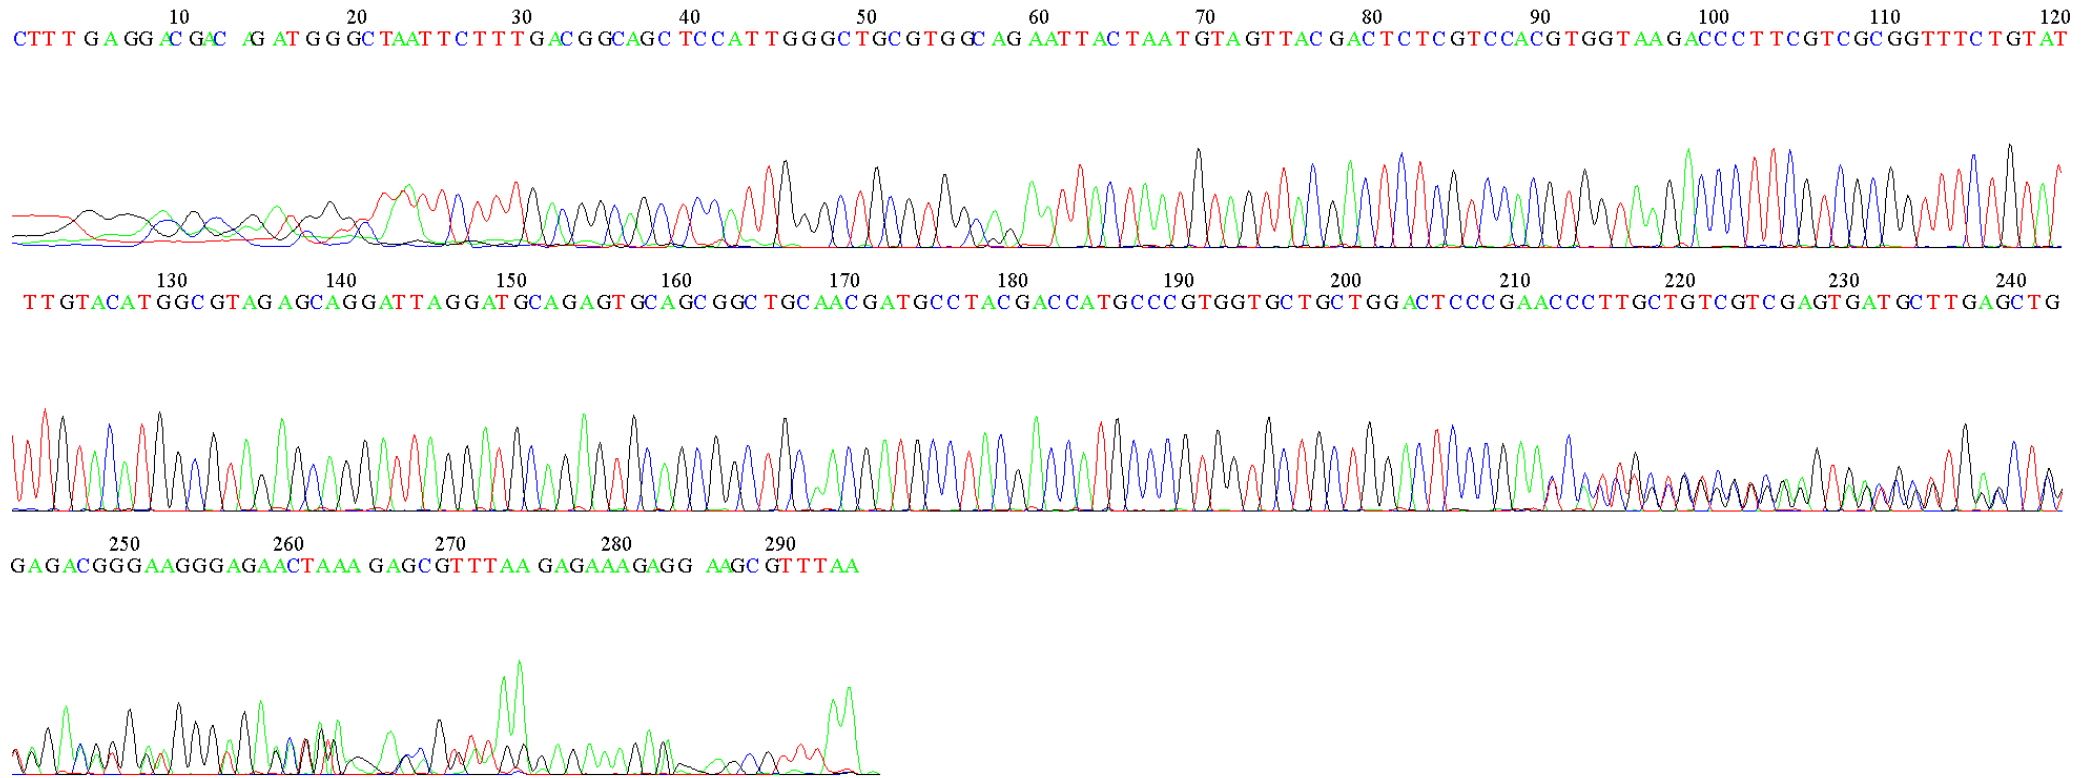

Supplement: Supplementary file 59 [file 1]

File: 28-6Reverse\_180.ab1 Run Ended: 2020/8/7 2:32:51 Signal G:3450 A:5203 C:9234 T:4771  
 Sample: 28-6Reverse\_180 Lane: 63 Base spacing: 12.730081 293 bases in 3634 scans Page 1 of 1

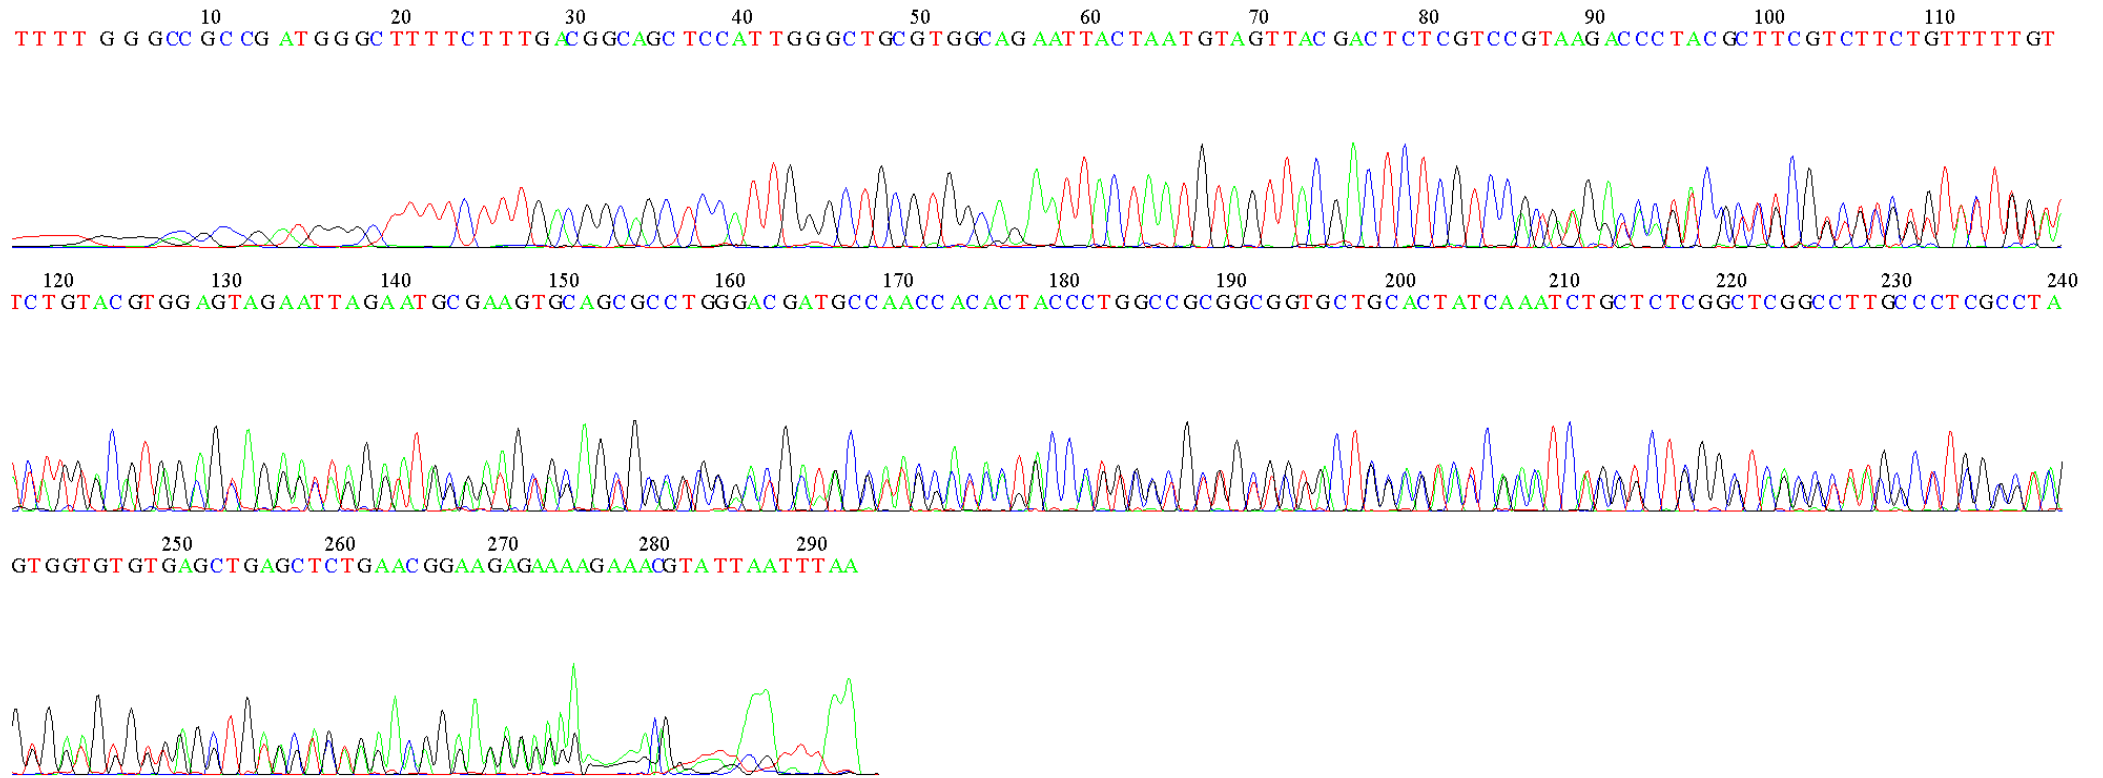

Supplement: Supplementary file 60 [file 1]

File: 1B\_Full\_26-5R\_217.ab1 Run Ended: 2020/9/1 19:34:29 Signal G:2049 A:4508 C:6500 T:3393  
 Sample: 1B\_Full\_26-5R\_217 Lane: 86 Base spacing: 12.941336 236 bases in 2945 scans Page 1 of 1

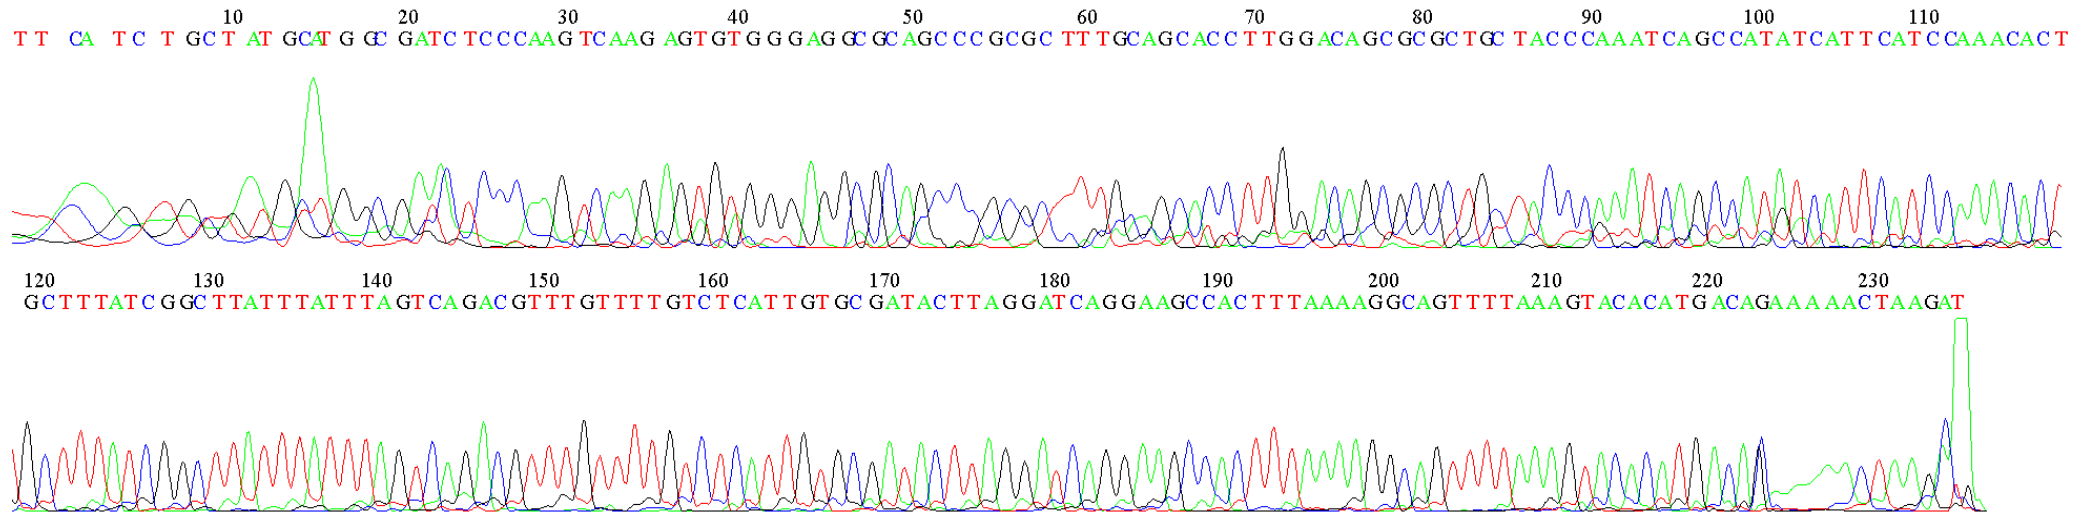

Supplement: Supplementary file 62 [file 1]

File: 26-4Reverse\_180.ab1 Run Ended: 2020/8/7 2:32:51 Signal G:3848 A:6417 C:10320 T:5327  
 Sample: 26-4Reverse\_180 Lane: 40 Base spacing: -13.4993105 331 bases in 3839 scans Page 1 of 1

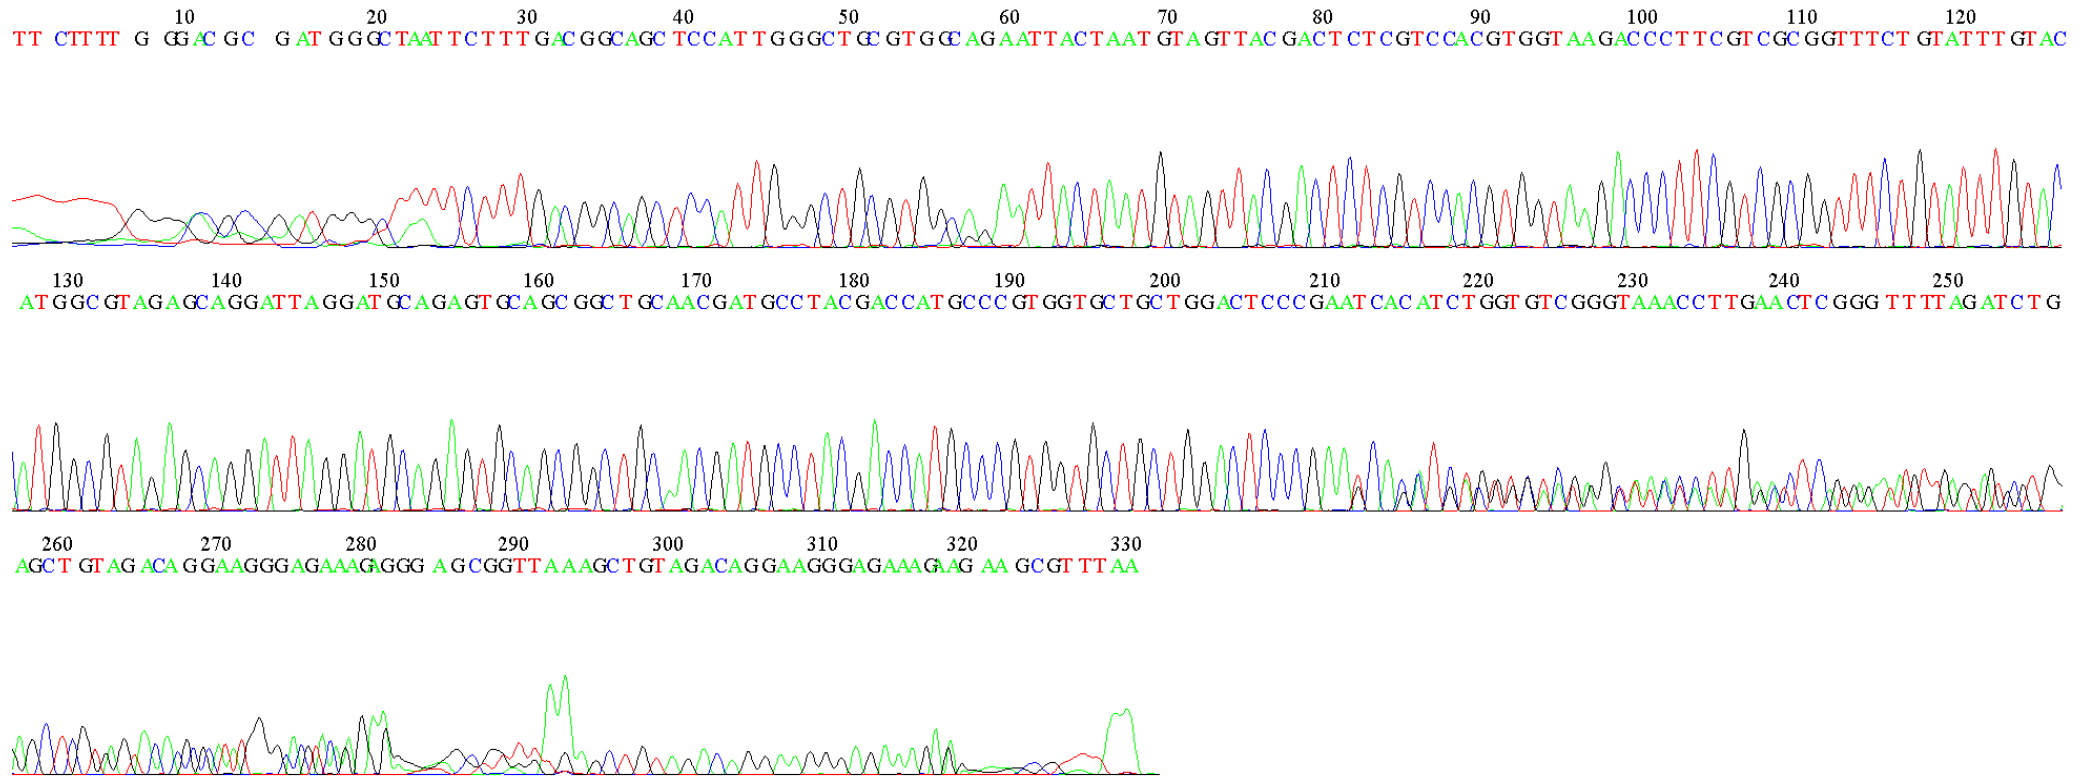

Supplement: Supplementary file 64 [file 1]

File: 2B\_TMR\_7-3F\_211.ab1 Run Ended: 2020/11/24 21:54:13 Signal G:1806 A:3210 C:5569 T:1679  
 Sample: 2B\_TMR\_7-3F\_211 Lane: 85 Base spacing: -13.4993105 499 bases in 6142 scans Page 1 of 1

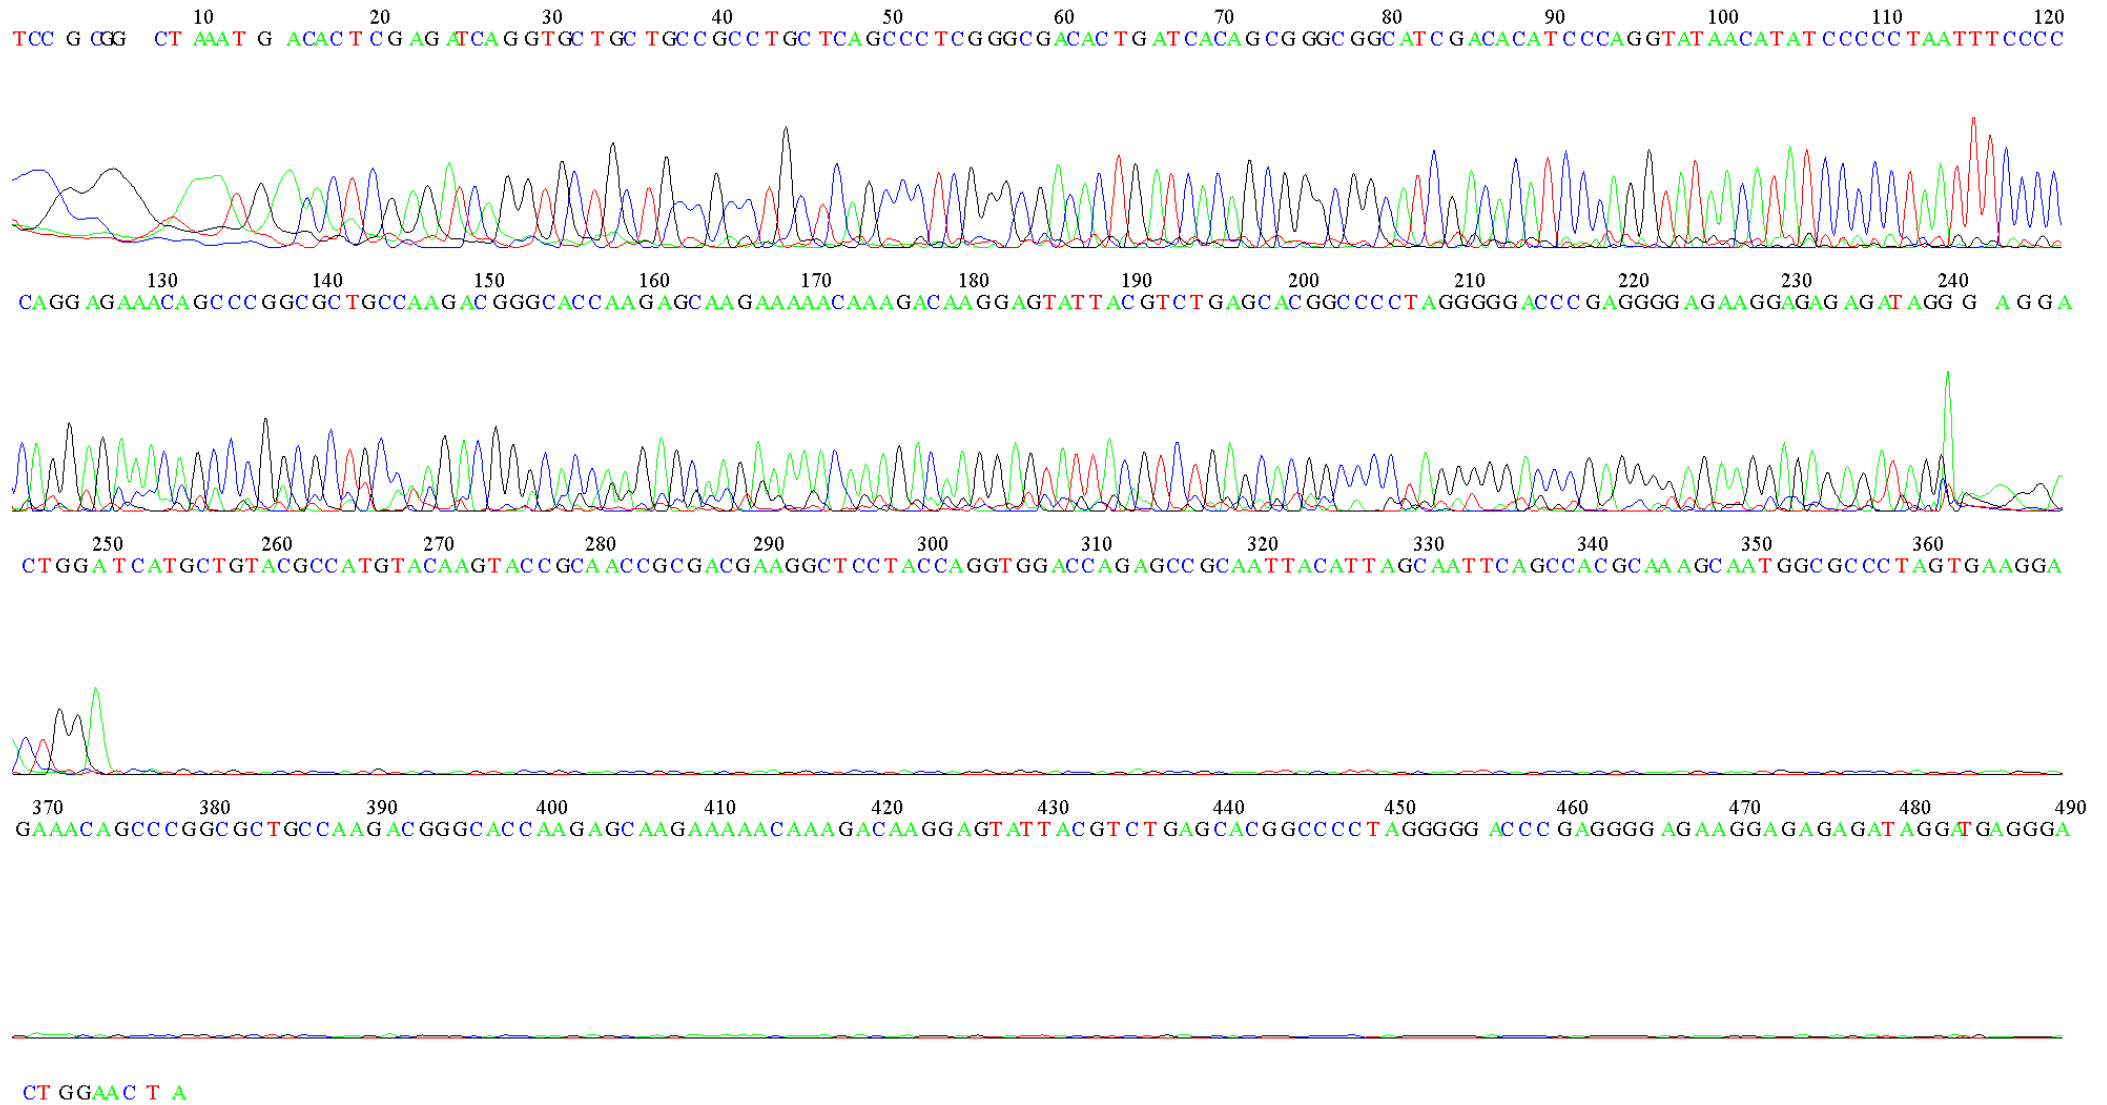

Supplement: Supplementary file 65 [file 1]

File: 20-3Reverse\_180.ab1 Run Ended: 2020/8/7 2:32:51 Signal G:3398 A:4861 C:8314 T:4226  
 Sample: 20-3Reverse\_180 Lane: 43 Base spacing: 12.632737 290 bases in 3629 scans Page 1 of 1

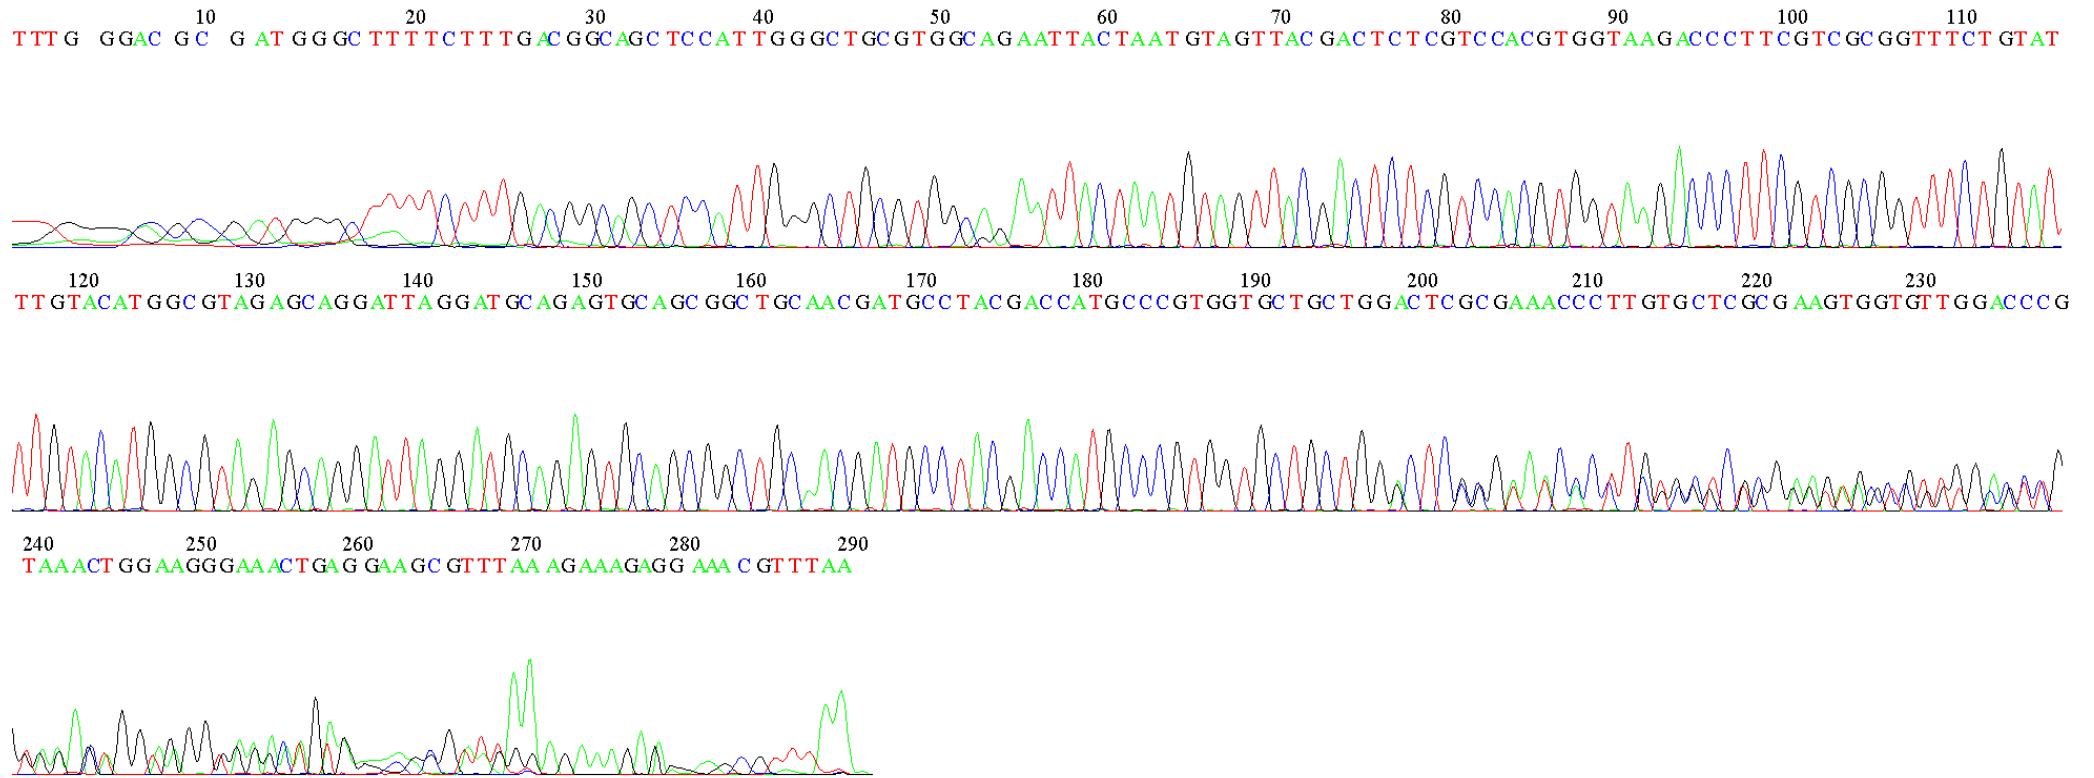

Supplement: Supplementary file 66 [file 1]

File: 2B\_TMR\_7-3R\_212.ab1 Run Ended: 2020/11/24 21:54:13 Signal G:1131 A:1537 C:3134 T:1502  
Sample: 2B\_TMR\_7-3R\_212 Lane: 83 Base spacing: -13.4993105 502 bases in 6000 scans Page 1 of 1

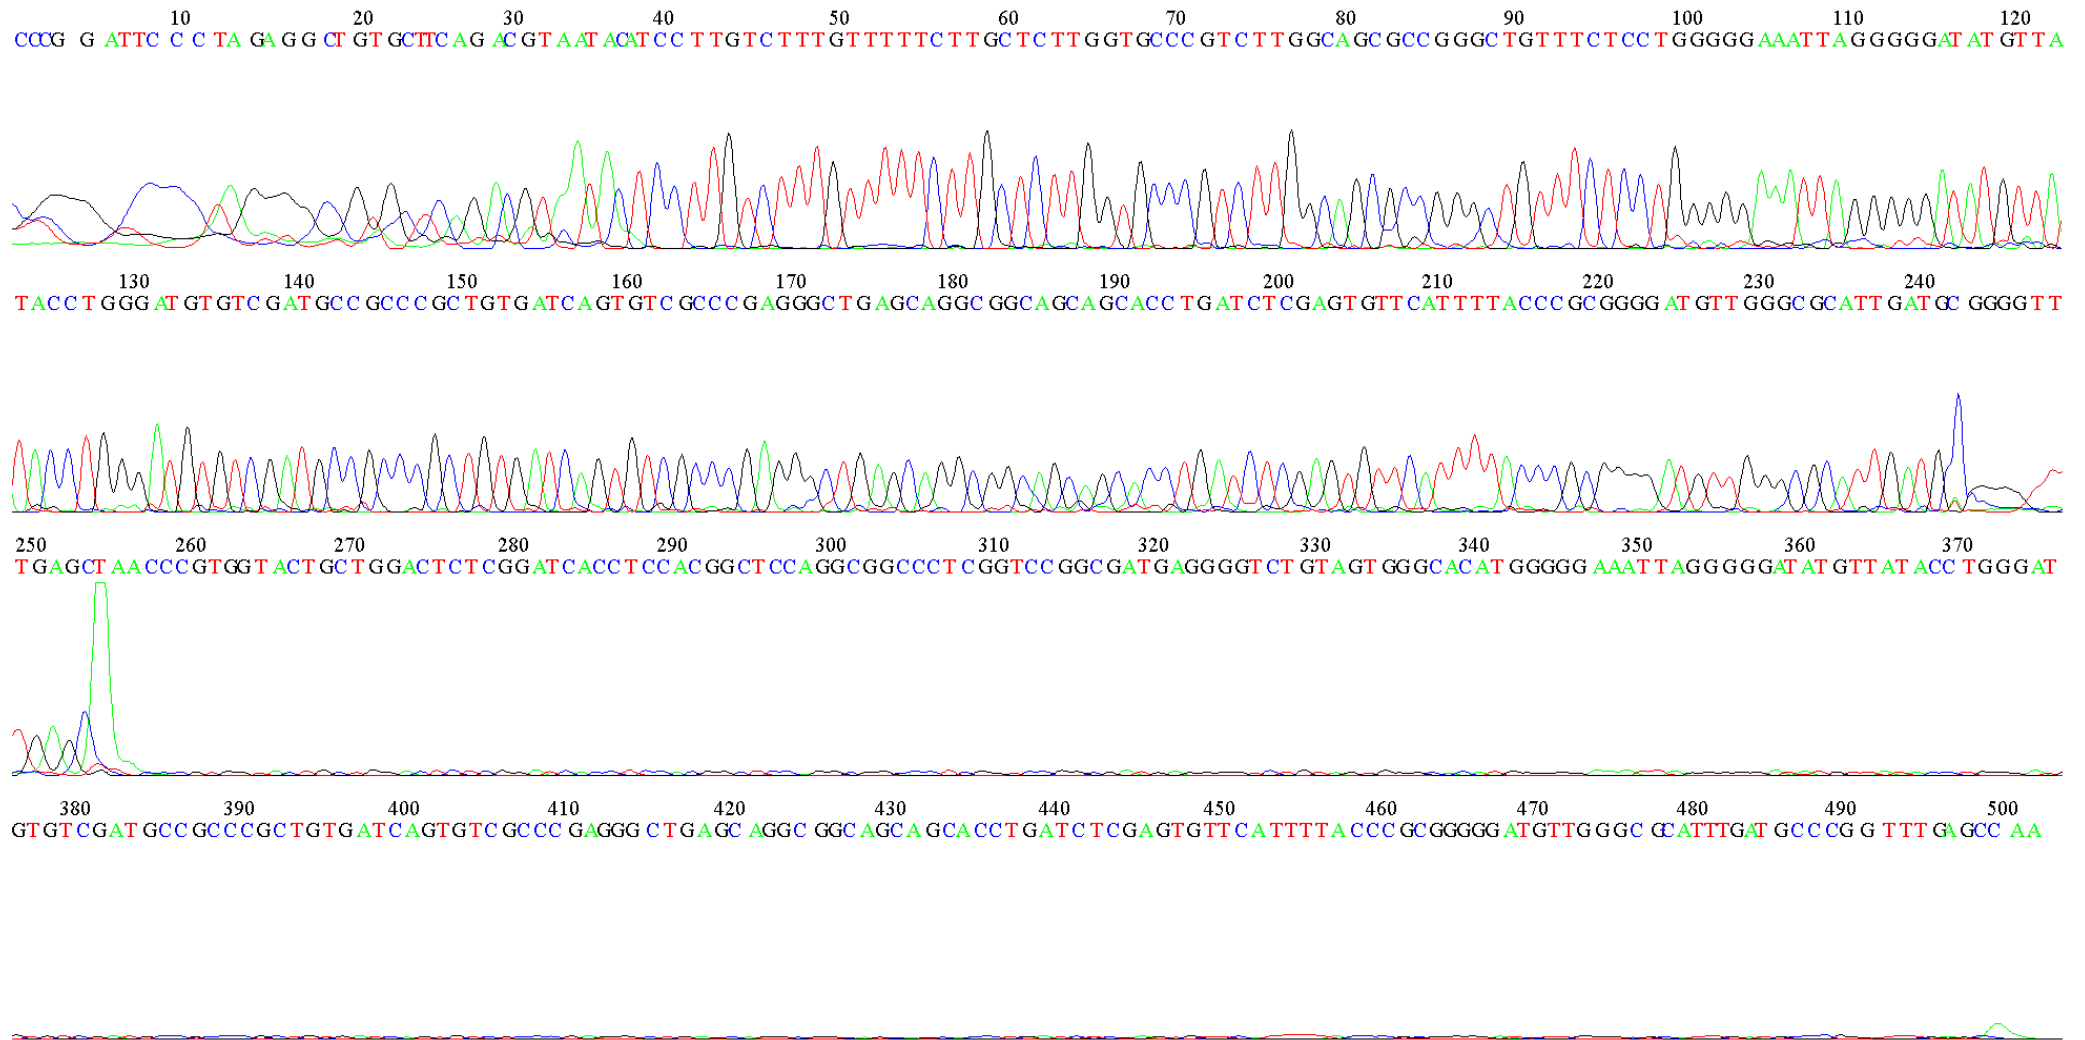

Supplement: Supplementary file 67 [file 1]

File: 2A\_TMR\_3-7F\_209.ab1 Run Ended: 2020/9/28 22:28:4 Signal G:680 A:1620 C:2942 T:693  
 Sample: 2A\_TMR\_3-7F\_209 Lane: 81 Base spacing: 13.251242 491 bases in 5989 scans Page 1 of 1

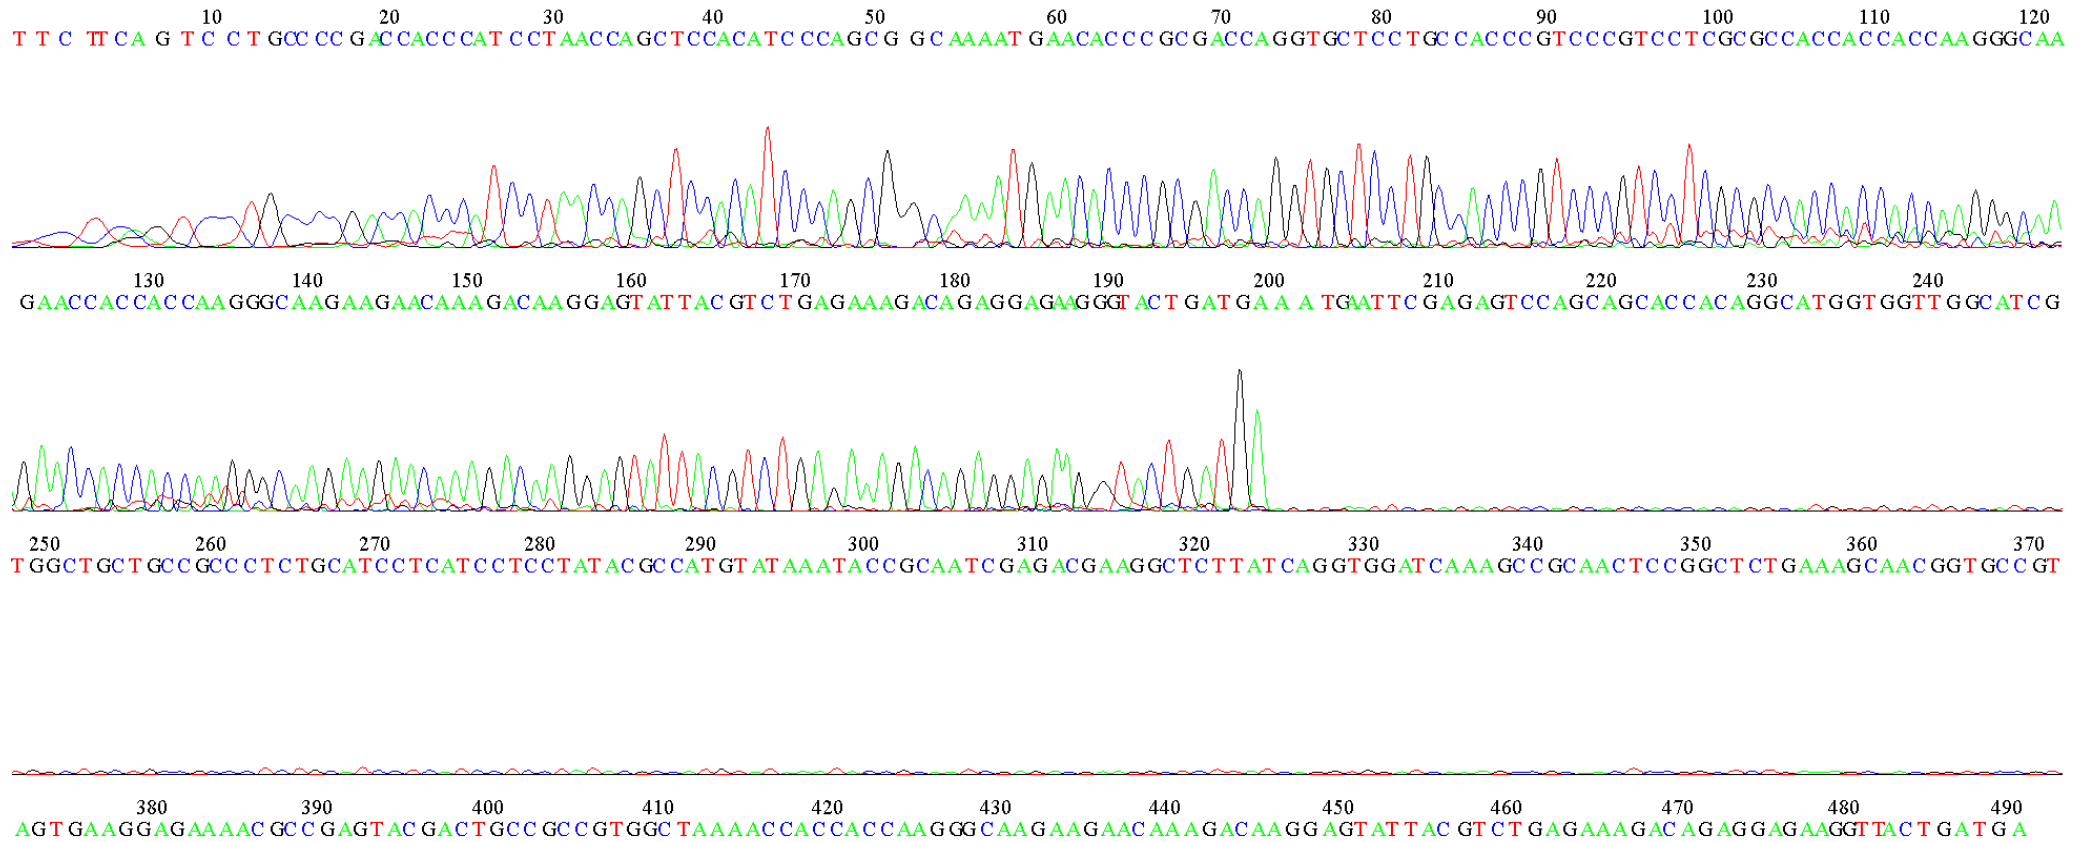

Supplement: Supplementary file 70 [file 1]

File: 1B\_Full\_26-5F\_213.ab1 Run Ended: 2020/9/1 19:34:29 Signal G:2679 A:5002 C:7857 T:4452  
 Sample: 1B\_Full\_26-5F\_213 Lane: 88 Base spacing: 12.85166 237 bases in 2938 scans Page 1 of 1

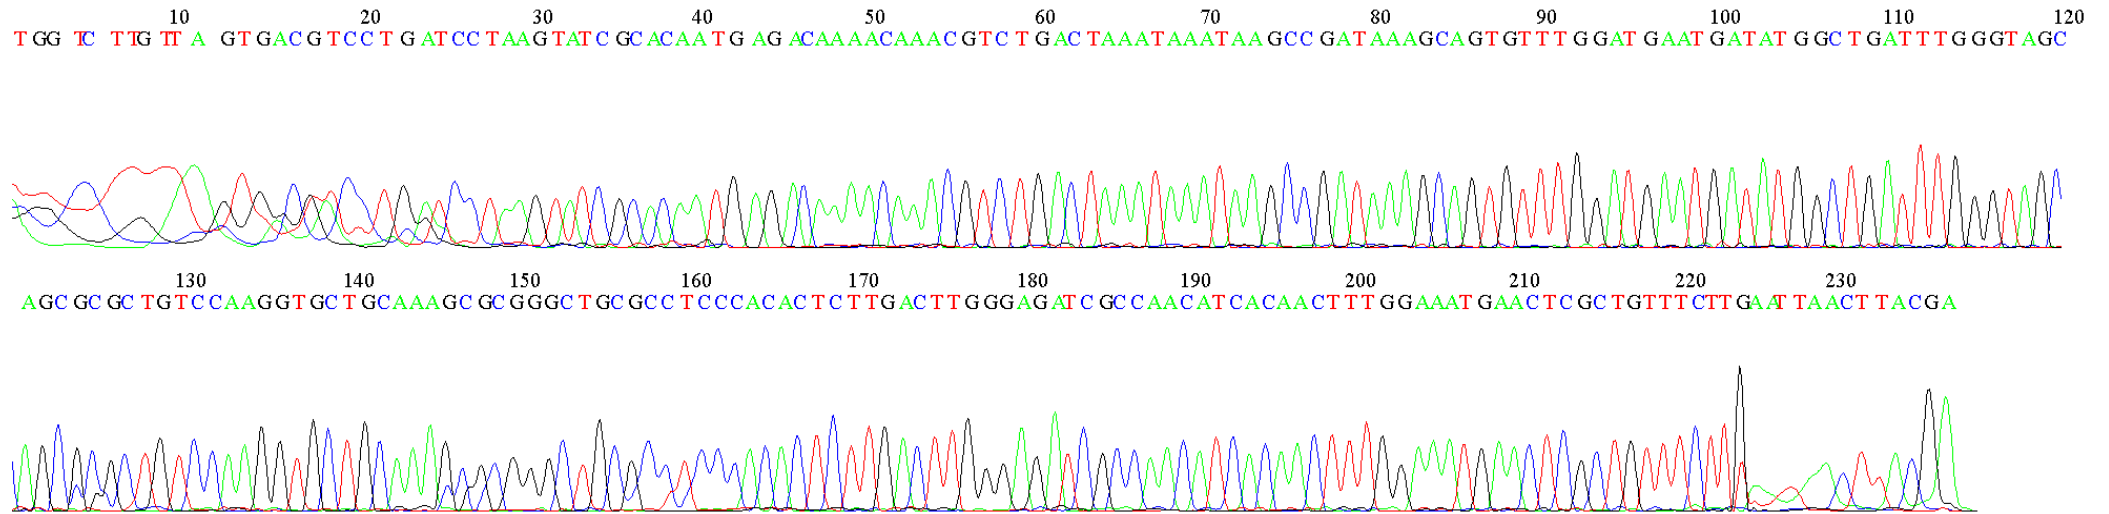

Supplement: Supplementary file 71 [file 1]

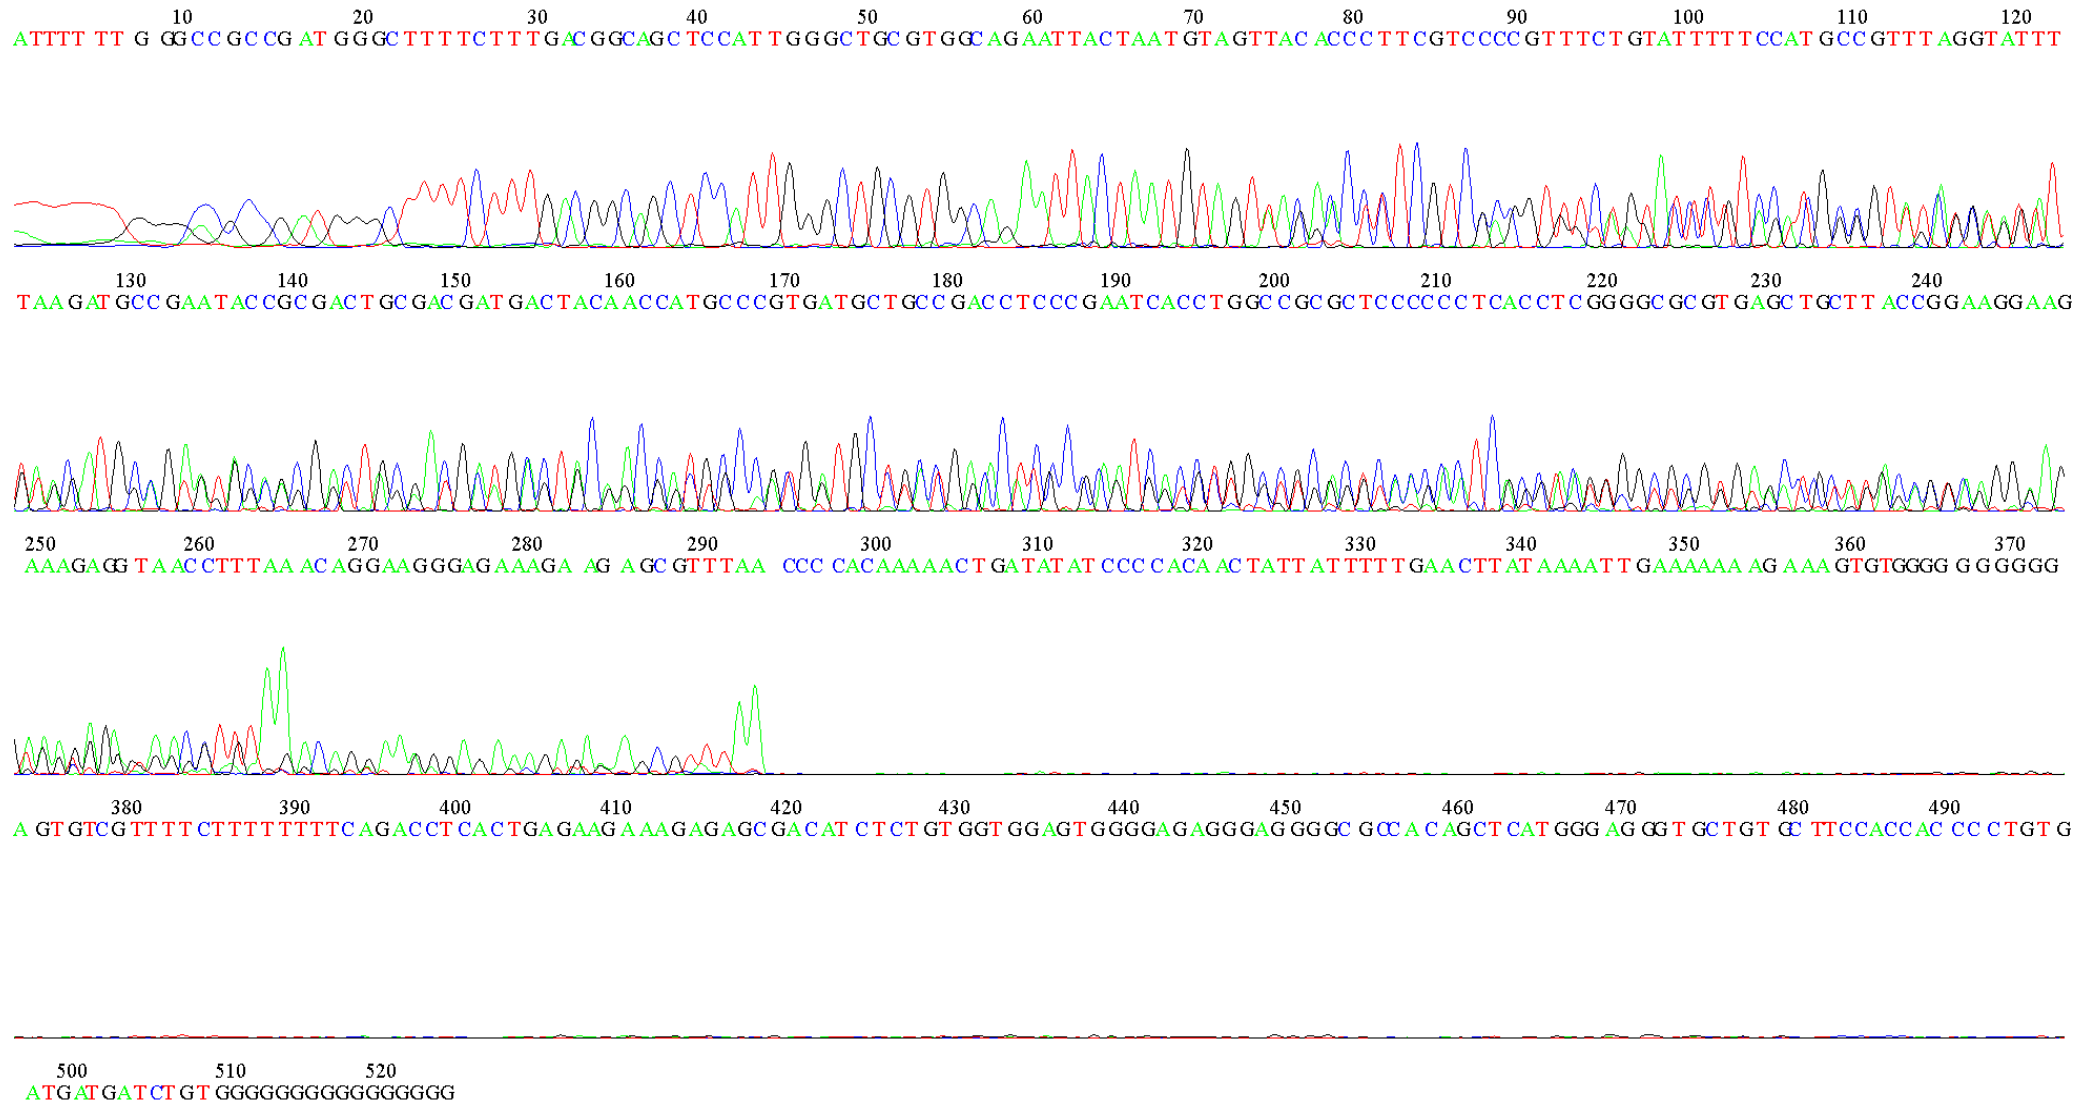

Supplement: Supplementary file 72 [file 1]
